# Supplementary material for: Cold-Adapted Live Attenuated SARS-Cov-2 Vaccine Completely Protects Human ACE2 Transgenic Mice from SARS-Cov-2 Infection
Source: PubMed Central journal article supplement (PMC7712048; doi:10.3390/vaccines8040584), 2020-10-03
Supplement: vaccines-08-00584-s001.pdf [file vaccines-08-00584-s001.pdf]

**SUPPLEMENTARY MATERIALS for**

**Cold-adapted live attenuated SARS-CoV-2 vaccine completely protects**

**human ACE2 transgenic mice from SARS-CoV-2 infection**

Sang Heui Seo <sup>1,2, \*</sup> & Yunyueng Jang <sup>1,2</sup>

<sup>1</sup>Laboratory of Influenza Research, College of Veterinary Medicine,

<sup>2</sup>Institute of Influenza Virus,

Chungnam National University, Daejeon 34134,

Republic of Korea.

Table S1-S4

Figs. S1-S11

**Table S1. Primers used for PCR amplification of the gene segments in cold-adapted live attenuated SARS-CoV-2 vaccine strain (SARS-CoV-2/human/Korea/CNUHV03-CA22°C/2020)**

| segment | F Primer | F sequence                       | R primer | R sequence                    |
|---------|----------|----------------------------------|----------|-------------------------------|
| 1       | 1F       | ATTAAGGTTTATACCTCCAGGTAAC        | 1300R    | CACCTTCTTAGTCAAATTCAGTG       |
| 2       | 1200F    | GCAACCAAATGTGCCTTTCAAC           | 2500R    | TTCTCCCTCTAAGAAGATAATTTCTTTT  |
| 3       | 2400F    | ACTCAAAGGATTGTACAGAAAGTGTGT      | 3750R    | GTGCGAACAGTATCTACACAAACTCTTA  |
| 4       | 3650F    | GACATTCAACTTCTTAAGAGTGCTTAT      | 5000R    | GGTTAATGTTGTCTACTGTTGTAAACAC  |
| 5       | 4901F    | CTAGATGGTGAAGTTATCACCTTTGACA     | 6250R    | GCTTTATTAGTTGCATTGTTAACATGCC  |
| 6       | 6150F    | GACTTAAATGGTGATGTGGTGGC          | 7500R    | CACATCATAACAAGTTGATGAATTACAAC |
| 7       | 7400F    | GCTATGGTTAGAATGTACATCTTCTTTG     | 8750R    | GTTAGCAAAAACAAGTATCTGTAGATGC  |
| 8       | 8650F    | CCTGTTTCATGTCATGTCTAAACATACTGACT | 10,000R  | ACCTGAGTTACTGAAGTCATTGAGAGCC  |
| 9       | 9900F    | ATAAGTACAAGTATTTTAGTGGAGCAAT     | 11250R   | ACCATATCCAACCATGTCATAATAC     |
| 10      | 11150F   | GTCAAACATAAGCATGCATTCTCTGT       | 12,500R  | TGTTATAGTCTGGTAAGACAACCATTAG  |
| 11      | 12,400F  | CAACAACATTATCAACAATGCAAGAGAT     | 13750R   | TACCATGTCACCGTCTATTCTAAAC     |
| 12      | 13650F   | TGTAGTTAAGAGACACACTTCTCTAA       | 15,000R  | ACTCATTGAATCATAATAAAGTCTAGCC  |
| 13      | 14,900F  | GTATTAATGCTAACCAAGTCATCGTCAA     | 16250R   | CTGTGAATTGCAAAGAACAAGCC       |
| 14      | 16150F   | ACACATGTTAGACATGTATTCTGTTATGC    | 17,500R  | AATATTCTGGTTCTAGTGTGCCCTTAGT  |
| 15      | 17,400F  | TGCCAGATTACGTGCTAAGCACTATGTG     | 18750R   | CCCCATTGTTGAACATCAATCATAAACGG |
| 16      | 18650F   | CCTGAGCGCACCTGTTGTCTATG          | 20,000R  | ACTCTACCATCAAAAAAGACAGTGAGTG  |
| 17      | 19,900F  | GCACATATACTACTATTGGTGTGTTGTT     | 21250R   | GCTTCAGATGATGACGCATTAC        |
| 18      | 21150F   | GGAGGTTCCGTGGCTATAAAGAT          | 22,500R  | TAGATTCCTTTTCTACAGTGAAGGATT   |
| 19      | 22,401F  | ATGAAAATGGAACCATTACAGATGCTGT     | 23750R   | CTGATGTCTTGGTCATAGACACTG      |
| 20      | 23650F   | CTACACTATGTCACCTGGTGCAGA         | 25,000R  | GTCTAATTCAGGTTGCAAAGGATCATAA  |
| 21      | 24,900F  | AAATCATTACTACAGACAACACATTTGT     | 26250R   | CTCTCCGAAACGAATGAGTAC         |
| 22      | 26150F   | CGACGGTTCATCCGGAGTTGTT           | 27,500R  | GAGCAAGGTTCTTTTAAAAGTACTGTTG  |
| 23      | 27,400F  | ATTATTCTTTTCTTGGCACTGATAACAC     | 28700R   | CGGGTGCCAATGTGATCTTTTG        |
| 24      | 28600F   | TTCTACTACCTAGGAAGTGGGC           | 29,843R  | GTCATTCTCCTAAGAAGCTATTAATAATC |

**Table S2. Primers for the synthesis of cDNA for cold-adapted live attenuated SARS-CoV-2 vaccine strain (SARS-CoV-2/human/Korea/CNUHV03-CA22°C/2020)**

| <b>Primer</b> | <b>Sequence</b>               |
|---------------|-------------------------------|
| 2500R         | TTCTCCCTCTAAGAAGATAATTTCTTTT  |
| 5000R         | GGTAAATGTTGTCTACTGTTGTAAACAC  |
| 7500R         | CACATCATAACAAGTTGATGAATTACAAC |
| 10,000R       | ACCTGAGTTACTGAAGTCATTGAGAGCC  |
| 12,500R       | TGTTATAGTCTGGTAAGACAACCATTAG  |
| 15,000R       | ACTCATTGAATCATAATAAAGTCTAGCC  |
| 17,500R       | AATATTCTGGTTCTAGTGTGCCCTTAGT  |
| 20,000R       | ACTCTACCATCAAAAAGACAGTGAGTG   |
| 22,500R       | TAGATTCCTTTTTCTACAGTGAAGGATT  |
| 25,000R       | GTCTAATTCAGGTTGCAAAGGATCATAA  |
| 27,500R       | GAGCAAGGTTCTTTTAAAAGTACTGTTG  |
| 29,843R       | GTCATTCTCCTAAGAAGCTATTAAAATC  |

**Table S3. The changed nucleotide sequences in cold-adapted live attenuated SARS-CoV-2 vaccine strain (SARS-CoV-2/human/Korea/CNUHV03-CA22°C/2020)**

| Gene name                      |       | Changed nucleotide sequences                                                        | The number of changed sequence                                                                                                                                              |                           |
|--------------------------------|-------|-------------------------------------------------------------------------------------|-----------------------------------------------------------------------------------------------------------------------------------------------------------------------------|---------------------------|
| ORF1ab                         | ORF1a | nsp2                                                                                | Deletion : GGTCATGTT(244~252) (NS), A253G (NS), G698A (NS), T2271C (S)                                                                                                      | 12 [11 (NS) + 1 (S)]/1923 |
|                                |       | nsp3                                                                                | G3288A(S), A3550G (NS), C3855T (S), G4754A (NS), G5765A (NS), G6126A (S), G6240A (S), C6933T (S), C7115T (NS), C7311T (S), A7419G (S), C8031T (S), C8174T (NS), C8258T (NS) | 14 [6 (NS) + 8 (S)]/5835  |
|                                |       | nsp4                                                                                | A8611G (NS), C8914T (NS), G8953A (NS)                                                                                                                                       | 3 (NS)/1500               |
|                                |       | nsp6                                                                                | T10818G (NS), T10827A (NS), T10851G (S)                                                                                                                                     | 3 [2(NS)+ 1 (S)]/870      |
|                                |       | nsp7                                                                                | A11777C (NS)                                                                                                                                                                | 1 (NS)/249                |
|                                |       | nsp10                                                                               | C12882T (S), G13050A (S)                                                                                                                                                    | 2 (S)/417                 |
|                                | ORF1b | RNA-dependent RNA polymerase                                                        | C13822T (NS), G14417A (NS), C15464T (NS)                                                                                                                                    | 3 (NS)/2796               |
|                                |       | helicase                                                                            | C16810T (NS), C17508T (S), G17545A (NS)                                                                                                                                     | 3[2(NS)+ 1 (S)]/1803      |
|                                |       | 3'-to-5' exonuclease                                                                | C18349T (S)                                                                                                                                                                 | 1(S)/1581                 |
|                                |       | endoRNase                                                                           | T19506G (S)                                                                                                                                                                 | 1(S)/1038                 |
| 2'-O-ribose methyl transferase |       | G21113C (NS), C21168T (S), C21175T (NS)                                             | 3 [2(NS)+1 (S)]/894                                                                                                                                                         |                           |
| S                              |       | G113A (NS), C257T (NS), G287A (NS), G451A (NS), C2511T (S), T2902G (NS), C3003T (S) | 7 [5 (NS)+ 2 (S)]/3822                                                                                                                                                      |                           |
| M                              |       | C537T (S)                                                                           | 1 (S)/669                                                                                                                                                                   |                           |
| ORF7a                          |       | C141T (S), A201G (NS)                                                               | 2 [1(NS)+ 1(S)]/366                                                                                                                                                         |                           |
| ORF8                           |       | C63T (S)                                                                            | 1 (S)/366                                                                                                                                                                   |                           |
| N                              |       | N243T (S), T1082A (NS)                                                              | 2[1(NS)+1 (S)]/1260                                                                                                                                                         |                           |
| Total nucleotides              |       |                                                                                     | 59 [37 (NS)+22 (S)]/29874 including non-coding nucleotides                                                                                                                  |                           |

We compared the nucleotide sequences of cold-adapted live attenuated SARS-CoV-2 vaccine strain (SARS-CoV-2/human/Korea/CNUHV03-CA22°C/2020) with those in wild-type SARS-CoV-2: (SARS-CoV-2/human/Korea/CNUHV03/2020), which was used for developing cold-adapted live attenuated vaccine strain in Vero cells.

(S): (synonymous substitution). (NS): (nonsynonymous substitution)

**Table S4. Changed amino acid sequences in cold-adapted live attenuated SARS-CoV-2 vaccine strain (SARS-CoV-2/human/Korea/CNUHV03-CA22°C/2020)**

| Protein name       |                   | Changed amino acid sequences   | The number of changed sequence                 |        |
|--------------------|-------------------|--------------------------------|------------------------------------------------|--------|
| ORF1ab polyprotein | ORF1a polyprotein | nsp2                           | Deletion : GHV(82~84), M85V, G233E             | 5/641  |
|                    |                   | nsp3                           | N1184D, G1585D, S1922N, A2372V, P2725L, A2753V | 6/1945 |
|                    |                   | nsp4                           | S2871G, P2972S, G2985R                         | 3/500  |
|                    |                   | nsp6                           | F3606L, N3609K                                 | 2/290  |
|                    |                   | nsp7                           | D3926A                                         | 1/83   |
|                    | ORF1b             | RNA-dependent RNA polymerase   | R4608W, S4806N, A5155V                         | 3/932  |
|                    |                   | helicase                       | L5604F, V5849I                                 | 2/601  |
|                    |                   | 2'-O-ribose methyl transferase | C7038S, P7059S                                 | 2/298  |
| S protein          |                   | C38Y, S86F, G96E, G151S, S968A | 5/1274                                         |        |
| ORF7a              |                   | Y67C                           | 1/122                                          |        |
| N protein          |                   | I361K                          | 1/420                                          |        |
| Total amino acids  |                   |                                | 31/9755<br>(including non-changed ORFs)        |        |

We compared the amino acid sequences of cold-adapted live attenuated SARS-CoV-2 vaccine strain (SARS-CoV-2/human/Korea/CNUHV03-CA22°C/2020) with those in wild-type SARS-CoV-2 (SARS-CoV-2/human/Korea/CNUHV03/2020), which was used for developing cold-adapted live attenuated vaccine strain in Vero cells.

Single letter abbreviation name of amino acid: Glycine(G), Alanine(A), Valine(V), Cysteine(C), Proline(P), Leucine(L), Isoleucine(I), Methionine(M), Tryptophan(W), Phenylalanine(F), Serine(S), Tyrosine(Y), Asparagine(N), Lysine(K), Arginine(R), Histidine(H), Aspartic Acid(D), Glutamic Acid(E)

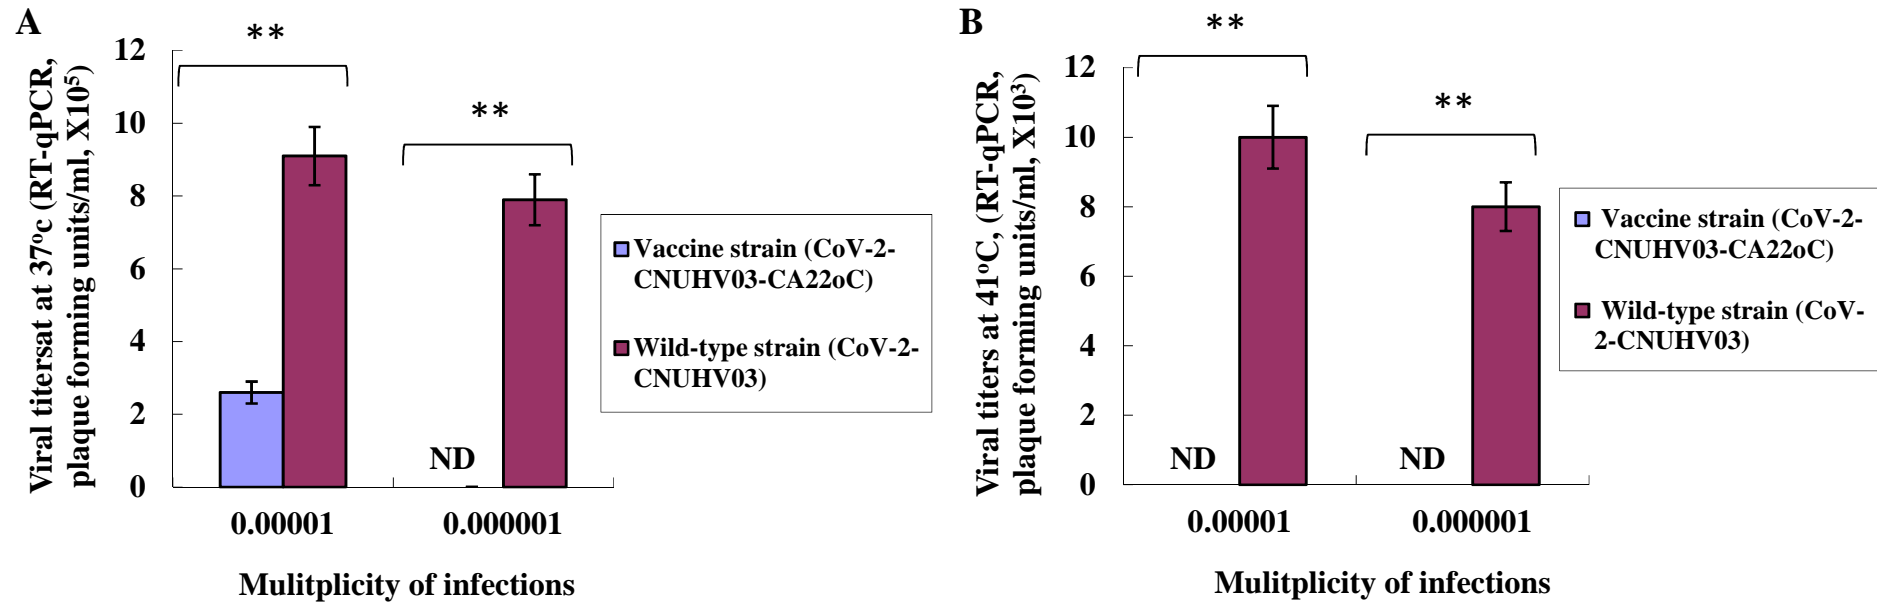

**Fig. S1. Temperature sensitivity of cold-adapted SARS-CoV-2 vaccine strain.** Vero cells were infected with 0.00001 or 0.000001 m.o.i of cold-adapted SARS-CoV-2 vaccine strain (CoV-2-CNUHV03-CA22°C) or wild-type SARS-CoV-2 (CoV-2-CNUHV03) and were incubated at 37°C or 41°C for 3 days. Viral titers in cell supernatants were determined by RT-qPCR using SARS-CoV-2 N primers and probe. Viral detection limit is 10 pfu. **A**, viral titers at 37°C; **B**, viral titers at 41°C. \* $p < 0.05$ , \*\* $p < 0.001$ , ND: non-detected.

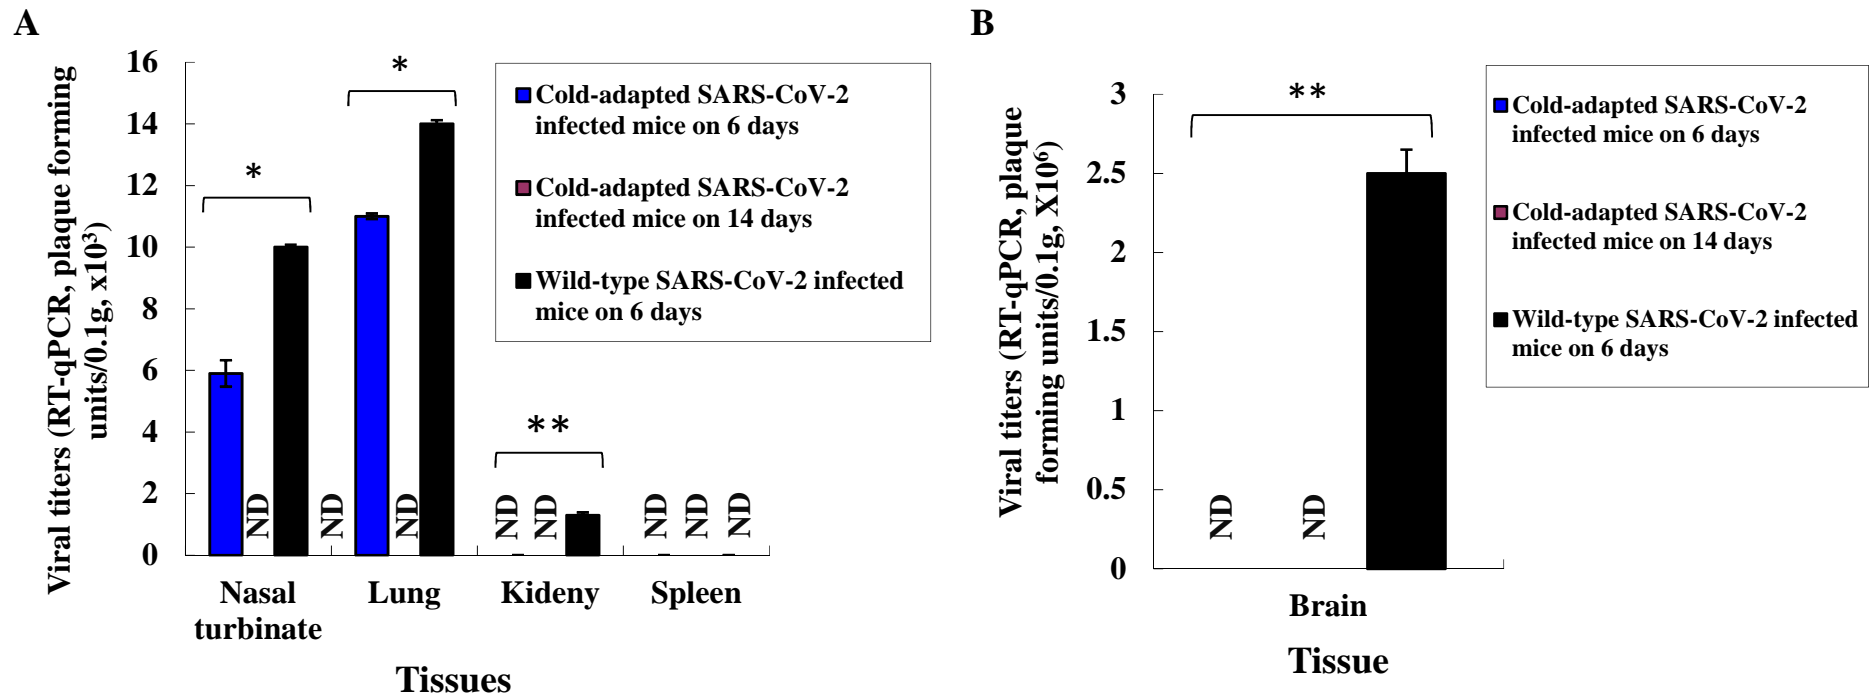

**Fig. S2. Viral titers in tissues of hACE2 transgenic mice infected with cold adapted SARS-CoV-2.** Viral titers in tissues of Fig.1c were quantified RT-qPCR. Viral titers are the mean of 3 tissues  $\pm$  standard deviations. Viral detection limit is 10 pfu. **A**, viral titers in nasal turbinate, lung, kidney, and spleen, **B**, viral titers in brain. \* $p < 0.05$ , \*\* $p < 0.001$ , **ND: non-detected**.

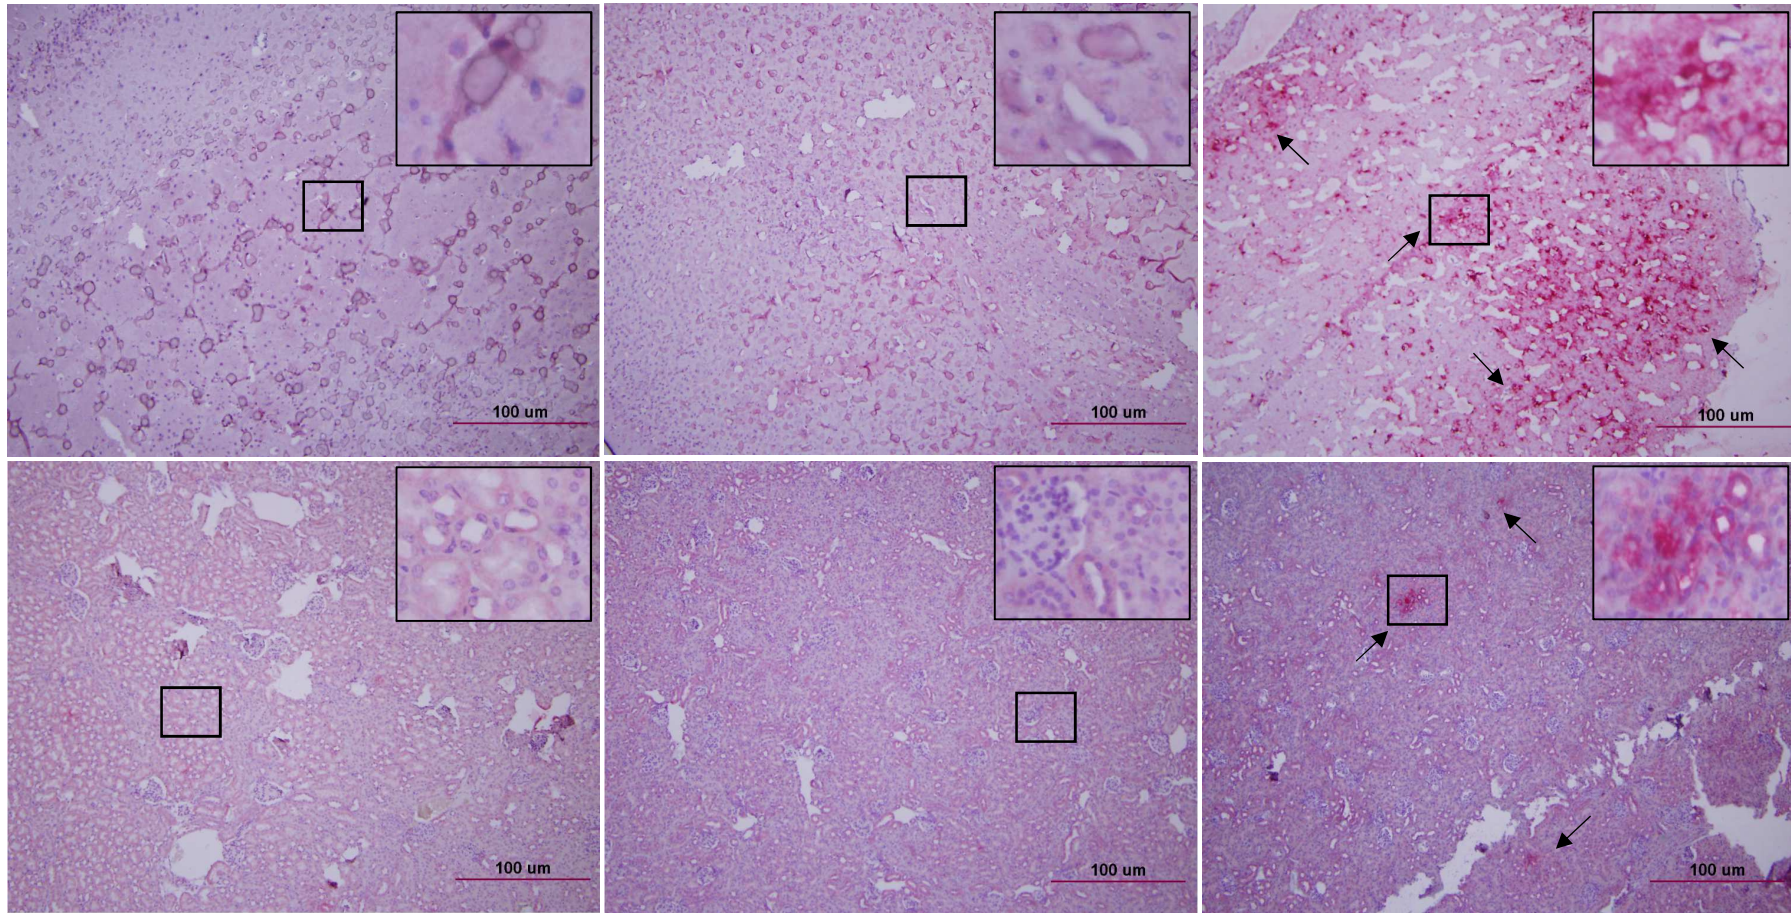

**Fig. S3. Antigen staining in brain and kidney of hACE2 transgenic mice infected with cold adapted SARS-CoV-2.** Brain and kidney tissues of Fig. 1C (on day 6 p.i.) were stained with SARS-CoV-2 NP antibody (X100). **A**, brain tissue of PBS-mock mouse; **B**, brain tissue of mouse i.n. infected with cold adapted SARS-CoV-2 (CoV-2-CNUHV03-CA22°C) ( $2 \times 10^4$  pfu); **C**, brain tissue of mouse i.n. infected with wild-type SARS-CoV-2 (CoV-2-CNUHV03) ( $2 \times 10^4$  pfu); **D**, kidney tissue of PBS-mock mouse; **E**, kidney tissue of mouse i.n. infected with cold adapted SARS-CoV-2 (CoV-2-CNUHV03-CA22°C) ( $2 \times 10^4$  pfu); **F**, kidney tissue of mouse i.n. infected with wild-type SARS-CoV-2 (CoV-2-CNUHV03) ( $2 \times 10^4$  pfu). Arrow: positive antigen staining. Inlet (X400)



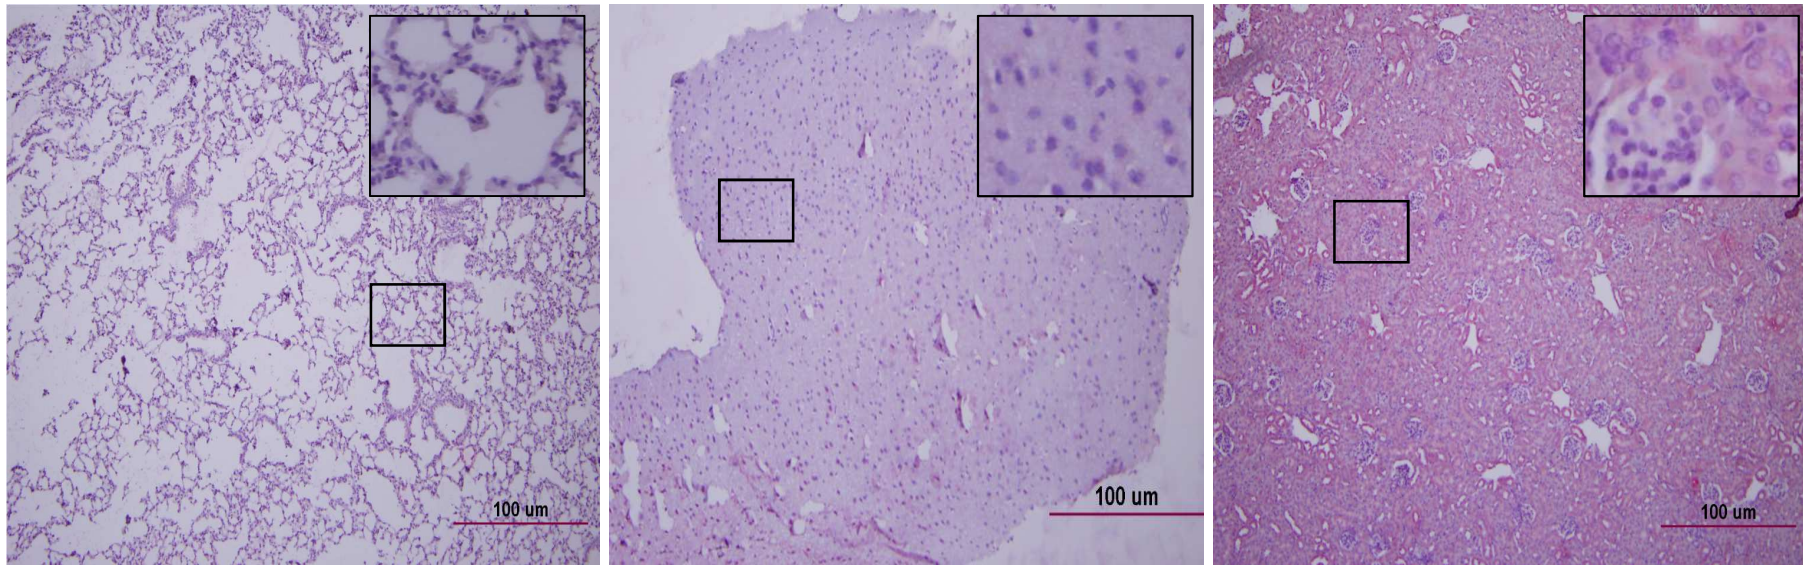

**Fig. S4. Antigen staining in lung, brain and kidney of hACE2 transgenic mice infected with cold adapted SARS-CoV-2 on day 14 p.i.** Lung, brain and kidney tissues of Fig. 1 (on day 14 p.i.) were stained with SARS-CoV-2 NP antibody (X100). **A**, lung tissue of mouse i.n. infected with cold adapted SARS-CoV-2 (CoV-2-CNUHV03-CA22°C) ( $2 \times 10^4$  pfu); **B**, brain tissue of mouse i.n. infected with cold adapted SARS-CoV-2 (CoV-2-CNUHV03-CA22°C) ( $2 \times 10^4$  pfu); **C**, kidney tissue of mouse i.n. infected with cold adapted SARS-CoV-2 (CoV-2-CNUHV03-CA22°C) ( $2 \times 10^4$  pfu). Inlet (X400)

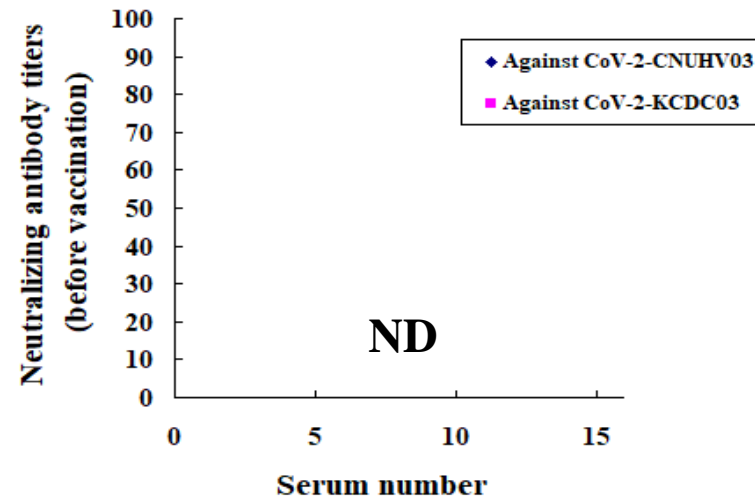

**Fig. S5. Neutralizing antibody titers in sera collected from hACE2 transgenic mice before immunization.** Sera were collected from K18-ACE2 mice (n=16) before immunization, and their neutralizing antibody titers were determined against wild-type SARS-CoV-2 viruses, CoV-2-CNUHV03 and CoV-2-KCDC03 in Vero cells. Detection limit of neutralizing antibody is 10. **ND: non-detected.**

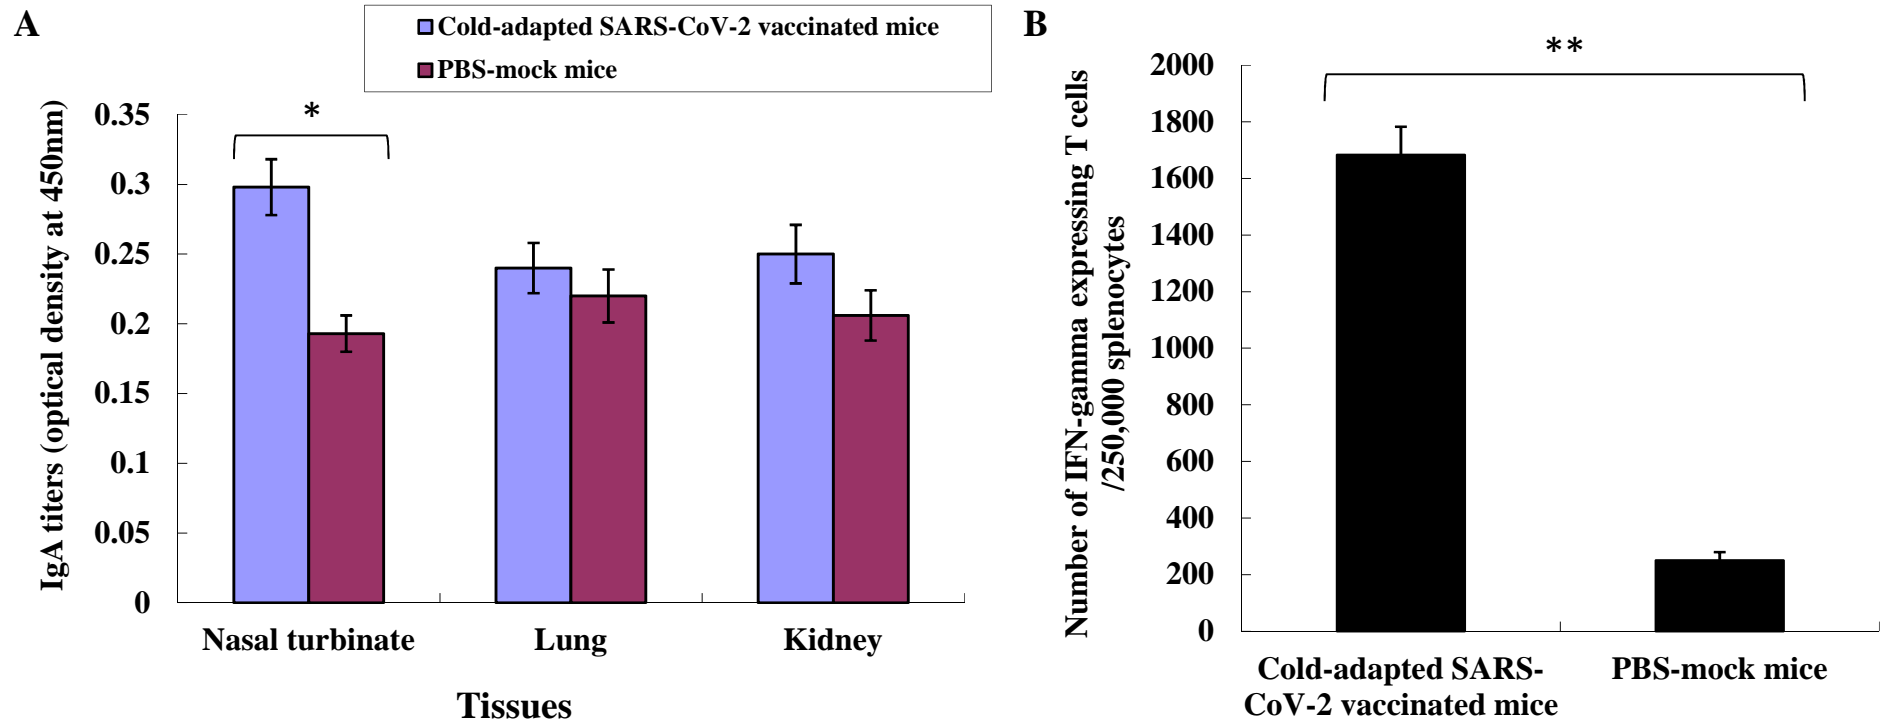

**Fig S6. IgA antibody titers and the number of T lymphocytes expressing IFN- $\gamma$  in the immunized hACE2 transgenic mice.** The immunized K18-ACE2 mice (n=3) with  $2 \times 10^4$  pfu of CoV-2-CNUHV03-CA22°C were euthanized to collect tissues (nasal turbinate, lungs, kidneys, spleens) on 19 days after immunization. Nasal turbinate, lungs, and kidneys were homogenized in PBS and were used for detection of IgA antibody by ELISA using the purified and inactivated SARS-CoV-2 antigen (SARS-CoV-2/human/Korea/CNUHV03/2020). Lymphocytes were collected from spleens and used to determine the number of T lymphocytes expressing IFN- $\gamma$  by ELISPOT assay. Data are the mean of 3 tissues  $\pm$  standard deviations. **A**, IgA antibody titers; **B**, number of T lymphocytes expressing IFN- $\gamma$ . \* $p < 0.05$ , \*\* $p < 0.001$

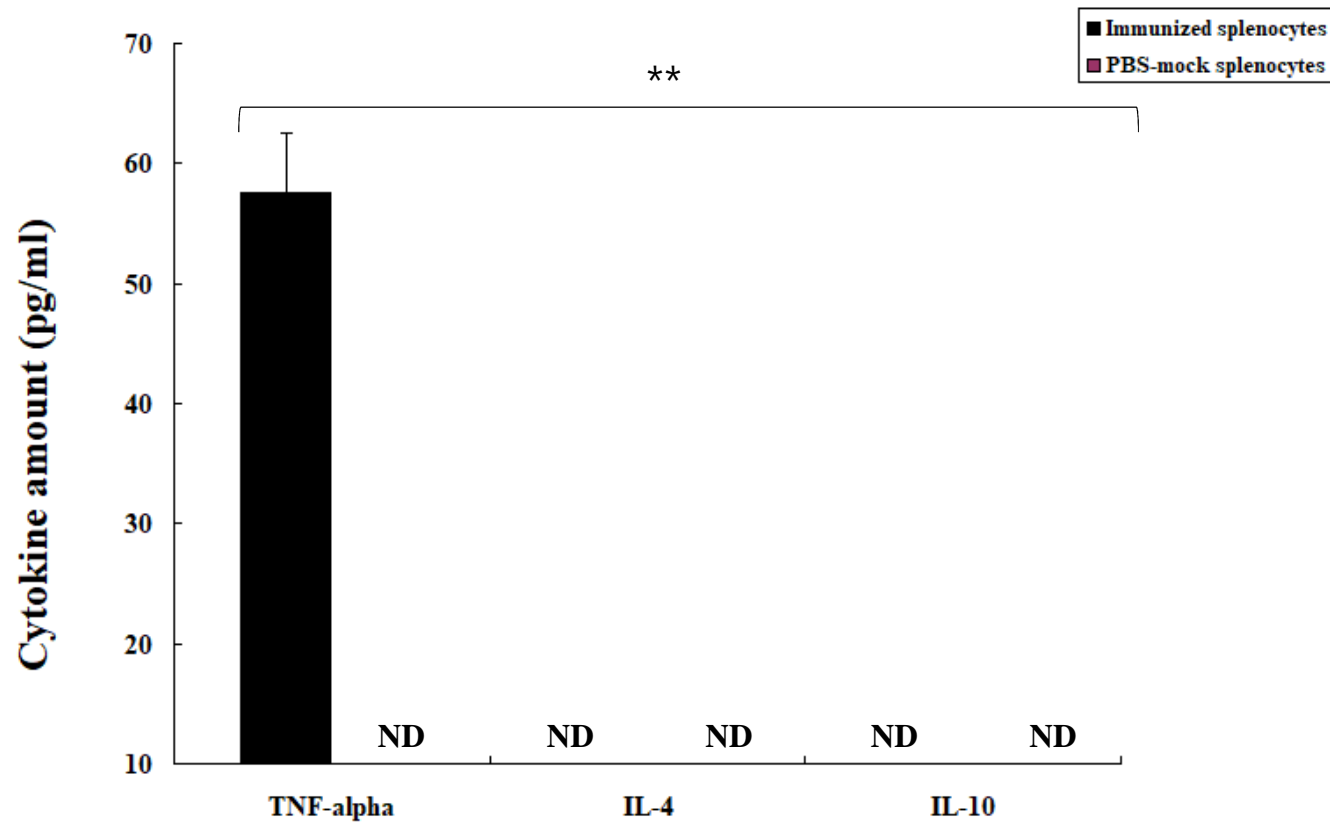

**Fig S7. Detection of Th1 and Th2 cytokines in splenocytes from the immunized hACE2 transgenic mice.** Splenocytes of Figure S6B were stimulated with cold-adapted SARS-CoV-2 vaccine for 24h, and their supernatants were used for detecting TNF- $\alpha$ , IL-4 and IL-10. Data are the mean of 3 tissues  $\pm$  standard deviations. **\*\*p<0.001; ND: non-detected.**

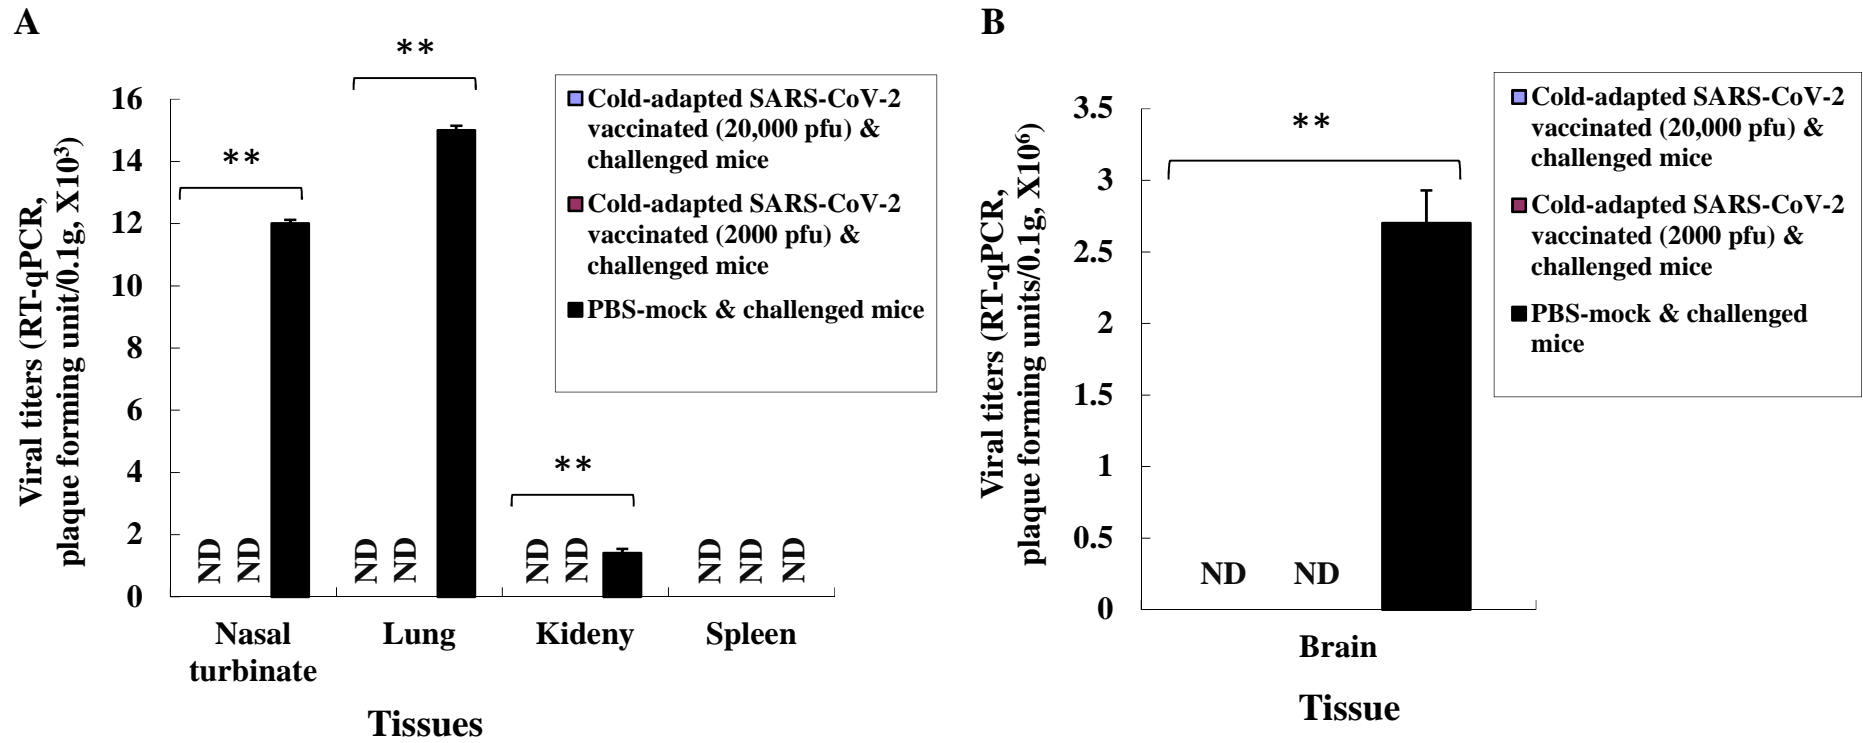

**Fig. S8. Viral titers in tissues of the immunized and challenged hACE2 transgenic mice.** Viral titers in tissues of Fig.3E were quantified RT-qPCR. Viral titers are the mean of 3 tissues  $\pm$  standard deviations. Viral detection limit is 10 pfu. **A**, viral titers in nasal turbinate, lung, kidney, and spleen; **B**, Viral titer in brain. \* $p < 0.05$ , \*\* $p < 0.001$ , ND: non-detected.

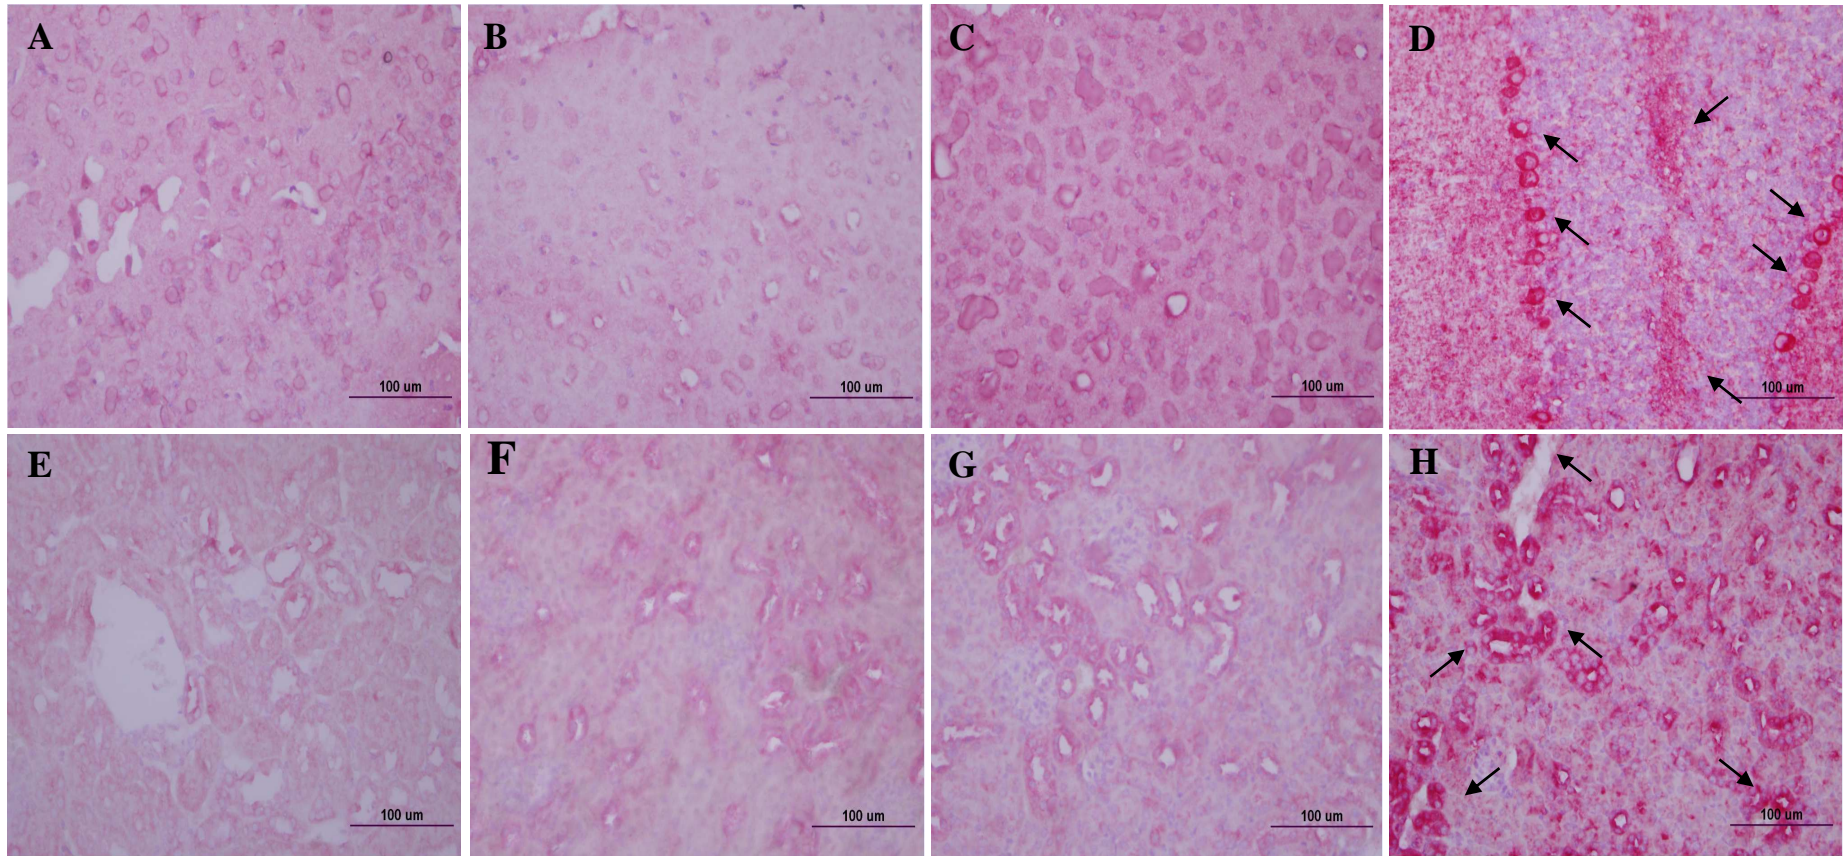

**Fig. S9. Antigen staining in brain and kidney of the immunized and challenged hACE2 transgenic mice.** Brain and kidney tissues of challenged K18-ACE2 mice (Fig. 3E) were stained with SARS-CoV-2 NP antibody (X400). **A**, brain tissue of PBS-mock mouse; **B**, brain tissue of vaccinated mouse with CoV-2-CNUHV03-CA22°C ( $2 \times 10^3$  pfu) and challenged with CoV-2-KCDC03 ( $2 \times 10^4$  pfu); **C**, brain tissue of vaccinated mouse with CoV-2-CNUHV03-CA22°C ( $2 \times 10^4$  pfu) and challenged with CoV-2-KCDC03 ( $2 \times 10^4$  pfu); **D**, brain tissue of PBS-mock vaccinated mouse challenged with CoV-2-KCDC03 ( $2 \times 10^4$  pfu); **E**, kidney tissue of PBS-mock mouse; **F**, kidney tissue of vaccinated mouse with CoV-2-CNUHV03-CA22°C ( $2 \times 10^3$  pfu) and challenged with CoV-2-KCDC03 ( $2 \times 10^4$  pfu); **G**, kidney tissue of vaccinated mouse with CoV-2-CNUHV03-CA22°C ( $2 \times 10^4$  pfu) and challenged with CoV-2-KCDC03 ( $2 \times 10^4$  pfu); **H**, kidney tissue of PBS-mock vaccinated mouse challenged with CoV-2-KCDC03 ( $2 \times 10^4$  pfu). Arrow: positive antigen staining.

ATGGAGAGCCTTGTCCCTGGTTTCAACGAGAAAACACACGTCCTCAACTCAGTTTGCCCTGTTTTACAGGTTTCGCGACGTGCTCGTACGTGGCTTTGGAGACTCCGTGGAGGA  
10 20 30 40 50 60 70 80 90 100 110

Wild ORFlab ATGGAGAGCCTTGTCCCTGGTTTCAACGAGAAAACACACGTCCTCAACTCAGTTTGCCCTGTTTTACAGGTTTCGCGACGTGCTCGTACGTGGCTTTGGAGACTCCGTGGAGGA  
Vac ORFlab ATGGAGAGCCTTGTCCCTGGTTTCAACGAGAAAACACACGTCCTCAACTCAGTTTGCCCTGTTTTACAGGTTTCGCGACGTGCTCGTACGTGGCTTTGGAGACTCCGTGGAGGA

GGTCTTATCAGAGGCACGTCAACATCTTAAAGATGGCACTTGTGGCTTAGTAGAAGTTGAAAAAGGCGTTTTGCCTCAACTTGAACAGCCCTATGIGTTCATCAAACGTT  
120 130 140 150 160 170 180 190 200 210 220

Wild ORFlab GGTCTTATCAGAGGCACGTCAACATCTTAAAGATGGCACTTGTGGCTTAGTAGAAGTTGAAAAAGGCGTTTTGCCTCAACTTGAACAGCCCTATGIGTTCATCAAACGTT  
Vac ORFlab GGTCTTATCAGAGGCACGTCAACATCTTAAAGATGGCACTTGTGGCTTAGTAGAAGTTGAAAAAGGCGTTTTGCCTCAACTTGAACAGCCCTATGIGTTCATCAAACGTT

CGGATGCTCGAACTGCACCTCATGGTCATGTTATGGTTGAGCTGGTAGCAGAACTCGAAGGCATTCAGTACGGTTCGTAGTGGTGAGACACTTGGTGTCCCTTGTCCCTCAT  
230 240 250 260 270 280 290 300 310 320 330

Wild ORFlab CGGATGCTCGAACTGCACCTCATGGTCATGTTATGGTTGAGCTGGTAGCAGAACTCGAAGGCATTCAGTACGGTTCGTAGTGGTGAGACACTTGGTGTCCCTTGTCCCTCAT  
Vac ORFlab CGGATGCTCGAACTGCACCTCAT-----GTGGTTGAGCTGGTAGCAGAACTCGAAGGCATTCAGTACGGTTCGTAGTGGTGAGACACTTGGTGTCCCTTGTCCCTCAT

GTGGGCGAAATACCAGTGGCTTACCGCAAGGTTCTTCTTCGTAAGAACGGTAATAAAGGAGCTGGTGGCCATAGTTACGGCGCCGATCTAAAGTCATTTGACTTAGGCGA  
340 350 360 370 380 390 400 410 420 430 440

Wild ORFlab GTGGGCGAAATACCAGTGGCTTACCGCAAGGTTCTTCTTCGTAAGAACGGTAATAAAGGAGCTGGTGGCCATAGTTACGGCGCCGATCTAAAGTCATTTGACTTAGGCGA  
Vac ORFlab GTGGGCGAAATACCAGTGGCTTACCGCAAGGTTCTTCTTCGTAAGAACGGTAATAAAGGAGCTGGTGGCCATAGTTACGGCGCCGATCTAAAGTCATTTGACTTAGGCGA

CGAGCTTGGCACTGATCCTTATGAAGATTTTCAAGAAAACCTGGAACACTTAAACATAGCAGTGGTGTATACCCGTGAACACTCATGCGTIGAGCTTAACGGAGGGGCATACACTC  
450 460 470 480 490 500 510 520 530 540 550

Wild ORFlab CGAGCTTGGCACTGATCCTTATGAAGATTTTCAAGAAAACCTGGAACACTTAAACATAGCAGTGGTGTATACCCGTGAACACTCATGCGTIGAGCTTAACGGAGGGGCATACACTC  
Vac ORFlab CGAGCTTGGCACTGATCCTTATGAAGATTTTCAAGAAAACCTGGAACACTTAAACATAGCAGTGGTGTATACCCGTGAACACTCATGCGTIGAGCTTAACGGAGGGGCATACACTC

GCTATGTCGATAACAACCTTCTGTGGCCCTGATGGCTACCCCTTTGAGTGCATTTAAAGACCTTCTAGCACGTGCTGGTAAAGCTTCATGCACCTTTGTCCGAACAACCTGGAC  
560 570 580 590 600 610 620 630 640 650 660

Wild ORFlab GCTATGTCGATAACAACCTTCTGTGGCCCTGATGGCTACCCCTTTGAGTGCATTTAAAGACCTTCTAGCACGTGCTGGTAAAGCTTCATGCACCTTTGTCCGAACAACCTGGAC  
Vac ORFlab GCTATGTCGATAACAACCTTCTGTGGCCCTGATGGCTACCCCTTTGAGTGCATTTAAAGACCTTCTAGCACGTGCTGGTAAAGCTTCATGCACCTTTGTCCGAACAACCTGGAC

TTTATTGACACTAAGAGGGGTGTATACTGCTGCCGTGGACATGAGCATGAAATTTGCTTTGGTACACCGGAACGTTCTGAAAAGAGCTATGAATTGCAGACACCTTTTTGAAAT  
670 680 690 700 710 720 730 740 750 760 770

Wild ORFlab TTTATTGACACTAAGAGGGGTGTATACTGCTGCCGTGGACATGAGCATGAAATTTGCTTTGGTACACCGGAACGTTCTGAAAAGAGCTATGAATTGCAGACACCTTTTTGAAAT  
Vac ORFlab TTTATTGACACTAAGAGGGGTGTATACTGCTGCCGTGGACATGAGCATGAAATTTGCTTTGGTACACCGGAACGTTCTGAAAAGAGCTATGAATTGCAGACACCTTTTTGAAAT

TAAATTGGCAAAGAAATTTGACACCTTCAATGGGGAATGTCCAAATTTTGTATTTCCCTTAAATTCATAATCAAGACTATTCAACCAAGGGTTGAAAAGAAAAAGCTTG  
780 790 800 810 820 830 840 850 860 870 880

Wild ORF1ab TAAATTGGCAAAGAAATTTGACACCTTCAATGGGGAATGTCCAAATTTTGTATTTCCCTTAAATTCATAATCAAGACTATTCAACCAAGGGTTGAAAAGAAAAAGCTTG  
Vac ORF1ab TAAATTGGCAAAGAAATTTGACACCTTCAATGGGGAATGTCCAAATTTTGTATTTCCCTTAAATTCATAATCAAGACTATTCAACCAAGGGTTGAAAAGAAAAAGCTTG

ATGGCTTTTATGGGTAGAATTCGATCTGTCATCCAGTTGCGTCACCAAATGAATGCAACCAAATGIGCCTTTCAACTCTCATGAAGTIGIGATCATTGIGGTGAAACTTCA  
890 900 910 920 930 940 950 960 970 980 990

Wild ORF1ab ATGGCTTTTATGGGTAGAATTCGATCTGTCATCCAGTTGCGTCACCAAATGAATGCAACCAAATGIGCCTTTCAACTCTCATGAAGTIGIGATCATTGIGGTGAAACTTCA  
Vac ORF1ab ATGGCTTTTATGGGTAGAATTCGATCTGTCATCCAGTTGCGTCACCAAATGAATGCAACCAAATGIGCCTTTCAACTCTCATGAAGTIGIGATCATTGIGGTGAAACTTCA

TGGCAGACGGGCGATTTTGTAAAGCCACTTGGCAATTTTGTGGCACTGAGAATTTGACTAAAGAAGGTGCCACTACTTGTGGTTACTTTACCCCAAAATGCTGTTGTAA  
1000 1010 1020 1030 1040 1050 1060 1070 1080 1090 1100

Wild ORF1ab TGGCAGACGGGCGATTTTGTAAAGCCACTTGGCAATTTTGTGGCACTGAGAATTTGACTAAAGAAGGTGCCACTACTTGTGGTTACTTTACCCCAAAATGCTGTTGTAA  
Vac ORF1ab TGGCAGACGGGCGATTTTGTAAAGCCACTTGGCAATTTTGTGGCACTGAGAATTTGACTAAAGAAGGTGCCACTACTTGTGGTTACTTTACCCCAAAATGCTGTTGTAA

AATTTATTGTCCAGCATGTCACAATTCAGAAGTAGGACCTGAGCATAGTCTTGCCGAATACCATAATGAATCTGGCTTGAAAACCATTCCTCGTAAGGGTGGTCCACTA  
1110 1120 1130 1140 1150 1160 1170 1180 1190 1200 1210

Wild ORF1ab AATTTATTGTCCAGCATGTCACAATTCAGAAGTAGGACCTGAGCATAGTCTTGCCGAATACCATAATGAATCTGGCTTGAAAACCATTCCTCGTAAGGGTGGTCCACTA  
Vac ORF1ab AATTTATTGTCCAGCATGTCACAATTCAGAAGTAGGACCTGAGCATAGTCTTGCCGAATACCATAATGAATCTGGCTTGAAAACCATTCCTCGTAAGGGTGGTCCACTA

TTGCCTTTGGAGGCTGTGTGTTCTCTTATGTTGGTTGCCATAACAAGTGTGCTTATTTGGGTTCCACGTAGCGCTAACATAGGTTGTAACCATAACAGGTTGTGTTGGA  
1220 1230 1240 1250 1260 1270 1280 1290 1300 1310 1320

Wild ORF1ab TTGCCTTTGGAGGCTGTGTGTTCTCTTATGTTGGTTGCCATAACAAGTGTGCTTATTTGGGTTCCACGTAGCGCTAACATAGGTTGTAACCATAACAGGTTGTGTTGGA  
Vac ORF1ab TTGCCTTTGGAGGCTGTGTGTTCTCTTATGTTGGTTGCCATAACAAGTGTGCTTATTTGGGTTCCACGTAGCGCTAACATAGGTTGTAACCATAACAGGTTGTGTTGGA

GAAGGTTCCGAAGGTCCTAATGACAACCTTCTTGAAATACTCCAAAAAGAGAAAGTCAACATCAATATGTTGGTGACTTTAAACTTAATGAAGAGATCGCCATTATTTT  
1330 1340 1350 1360 1370 1380 1390 1400 1410 1420 1430

Wild ORF1ab GAAGGTTCCGAAGGTCCTAATGACAACCTTCTTGAAATACTCCAAAAAGAGAAAGTCAACATCAATATGTTGGTGACTTTAAACTTAATGAAGAGATCGCCATTATTTT  
Vac ORF1ab GAAGGTTCCGAAGGTCCTAATGACAACCTTCTTGAAATACTCCAAAAAGAGAAAGTCAACATCAATATGTTGGTGACTTTAAACTTAATGAAGAGATCGCCATTATTTT

GGCATCTTTTTCTGCTTCCACAAGTGTGTTGTTGGAAACTGTGAAAGGTTTGGATTATAAAGCATTCAAACAAATTTGTTGAATCCTGTGGTAATTTTAAAGTTACAAAAG  
1440 1450 1460 1470 1480 1490 1500 1510 1520 1530 1540

Wild ORF1ab GGCATCTTTTTCTGCTTCCACAAGTGTGTTGTTGGAAACTGTGAAAGGTTTGGATTATAAAGCATTCAAACAAATTTGTTGAATCCTGTGGTAATTTTAAAGTTACAAAAG  
Vac ORF1ab GGCATCTTTTTCTGCTTCCACAAGTGTGTTGTTGGAAACTGTGAAAGGTTTGGATTATAAAGCATTCAAACAAATTTGTTGAATCCTGTGGTAATTTTAAAGTTACAAAAG



1550 1560 1570 1580 1590 1600 1610 1620 1630 1640 1650

Wild ORF1ab GAAAAGCTAAAAAAGGTGCCCTGGAATATTGGTGAACAGAAATCAATACTGAGTCCTCTTTATGCATTTGCATCAGAGGCTGCTCGTGTGTGTACGATCAATTTTCTCCCCG  
Vac ORF1ab GAAAAGCTAAAAAAGGTGCCCTGGAATATTGGTGAACAGAAATCAATACTGAGTCCTCTTTATGCATTTGCATCAGAGGCTGCTCGTGTGTGTACGATCAATTTTCTCCCCG

1660 1670 1680 1690 1700 1710 1720 1730 1740 1750 1760

Wild ORF1ab ACTCTTGAAACTGCTCAAAATTCGTGCGTGTGTTTACAGAAGGCCGCTATAACAATACTAGATGGAATTTACAGTATTCCTGAGACTCATTGATGCTATGATGTTTAC  
Vac ORF1ab ACTCTTGAAACTGCTCAAAATTCGTGCGTGTGTTTACAGAAGGCCGCTATAACAATACTAGATGGAATTTACAGTATTCCTGAGACTCATTGATGCTATGATGTTTAC

1770 1780 1790 1800 1810 1820 1830 1840 1850 1860 1870

Wild ORF1ab ATCTGATTTGGCTACTAACAATCTAGTTGTAATGGCCTACATTACAGGTTGGTGTGTTTACAGTTGACTTTCGCAGTTGGCTAACTAACATCTTTGGCACTGTTTATGAAAAAC  
Vac ORF1ab ATCTGATTTGGCTACTAACAATCTAGTTGTAATGGCCTACATTACAGGTTGGTGTGTTTACAGTTGACTTTCGCAGTTGGCTAACTAACATCTTTGGCACTGTTTATGAAAAAC

1880 1890 1900 1910 1920 1930 1940 1950 1960 1970 1980

Wild ORF1ab TCAAACCCGTCCTTGATTGGCTTGAAGAGAAGTTAAGGAAGGTGTAGAGTTCTTTAGAGACGGTTGGGAAATGTAAATTTATCTCAACCTGTGCTTGTGAAATTTGTC  
Vac ORF1ab TCAAACCCGTCCTTGATTGGCTTGAAGAGAAGTTAAGGAAGGTGTAGAGTTCTTTAGAGACGGTTGGGAAATGTAAATTTATCTCAACCTGTGCTTGTGAAATTTGTC

1990 2000 2010 2020 2030 2040 2050 2060 2070 2080 2090

Wild ORF1ab GGTTGGACAAATTTGTCACCTGTGCAAAGGAAATTAAGGAGAGTGTTCAGACATTCTTTAAGCTTGTAAATAAAATTTTGGCTTTTGTGTGCTGACTCTATCATTATTGGTGG  
Vac ORF1ab GGTTGGACAAATTTGTCACCTGTGCAAAGGAAATTAAGGAGAGTGTTCAGACATTCTTTAAGCTTGTAAATAAAATTTTGGCTTTTGTGTGCTGACTCTATCATTATTGGTGG

2100 2110 2120 2130 2140 2150 2160 2170 2180 2190 2200

Wild ORF1ab AGCTAAACTTTAAAGCCTTGAATTTAGGTGAAACATTTGTTCACGCCTCAAAGGGATTGTACAGAAAGTGTGTAAATCCAGAGAAGAAACTGGCCTACTCATGCCTCTAA  
Vac ORF1ab AGCTAAACTTTAAAGCCTTGAATTTAGGTGAAACATTTGTTCACGCCTCAAAGGGATTGTACAGAAAGTGTGTAAATCCAGAGAAGAAACTGGCCTACTCATGCCTCTAA

2210 2220 2230 2240 2250 2260 2270 2280 2290 2300 2310

Wild ORF1ab AAGCCCCAAAAGAAATTTATCTTCTTAGAGGGAGAAACACTTCCCACAGAAGTGTAAACAGAGGAAGTTGTTTTGAAAACCTGGTGTATTTACAACCATTTAGAACAACCTACT  
Vac ORF1ab AAGCCCCAAAAGAAATTTATCTTCTTAGAGGGAGAAACACTTCCCACAGAAGTGTAAACAGAGGAAGTTGTTTTGAAAACCTGGTGTATTTACAACCATTTAGAACAACCTACT

AGTGAAGCTGTTGAAGCTCCATTGGTTGGTACACCAGTTTGTATTAAACGGGCTTATGTTGCTCGAAATCAAAGACACAGAAAAGTACTGTGCCCTTGCACCTAATATGAT  
2320 2330 2340 2350 2360 2370 2380 2390 2400 2410 2420

Wild ORF1ab AGTGAAGCTGTTGAAGCTCCATTGGTTGGTACACCAGTTTGTATTAAACGGGCTTATGTTGCTCGAAATCAAAGACACAGAAAAGTACTGTGCCCTTGCACCTAATATGAT  
Vac ORF1ab AGTGAAGCTGTTGAAGCTCCATTGGTTGGTACACCAGTTTGTATTAAACGGGCTTATGTTGCTCGAAATCAAAGACACAGAAAAGTACTGTGCCCTTGCACCTAATATGAT

GGTAACAAACAATACCTTCACACTCAAAGGCGGTGCACCAACAAAGGTTACTTTTGGTGGATGACACTGTGATAGAAGTGCAAGGTTACAAGAGTGTGAATATCACTTTTGG  
2430 2440 2450 2460 2470 2480 2490 2500 2510 2520 2530

Wild ORF1ab GGTAACAAACAATACCTTCACACTCAAAGGCGGTGCACCAACAAAGGTTACTTTTGGTGGATGACACTGTGATAGAAGTGCAAGGTTACAAGAGTGTGAATATCACTTTTGG  
Vac ORF1ab GGTAACAAACAATACCTTCACACTCAAAGGCGGTGCACCAACAAAGGTTACTTTTGGTGGATGACACTGTGATAGAAGTGCAAGGTTACAAGAGTGTGAATATCACTTTTGG

AACTTGATGAAAGGATTGATAAAGTACTTAAATGAGAAGTGTCTGCGCTATACAGTTGAACTCGGTACAGAAGTAAATGAGTTTCGCTGTGTTGTGGCAGATGCTGTGCATA  
2540 2550 2560 2570 2580 2590 2600 2610 2620 2630 2640

Wild ORF1ab AACTTGATGAAAGGATTGATAAAGTACTTAAATGAGAAGTGTCTGCGCTATACAGTTGAACTCGGTACAGAAGTAAATGAGTTTCGCTGTGTTGTGGCAGATGCTGTGCATA  
Vac ORF1ab AACTTGATGAAAGGATTGATAAAGTACTTAAATGAGAAGTGTCTGCGCTATACAGTTGAACTCGGTACAGAAGTAAATGAGTTTCGCTGTGTTGTGGCAGATGCTGTGCATA

AAAACTTTGCAACCAGTATCTGAATTACTTACACCCTGGGCATTGATTTAGATGAGTGGAGTATGGCTACATACTACTTATTTGATGAGTCTGGTGAGTTTAAATTTGGC  
2650 2660 2670 2680 2690 2700 2710 2720 2730 2740 2750

Wild ORF1ab AAAACTTTGCAACCAGTATCTGAATTACTTACACCCTGGGCATTGATTTAGATGAGTGGAGTATGGCTACATACTACTTATTTGATGAGTCTGGTGAGTTTAAATTTGGC  
Vac ORF1ab AAAACTTTGCAACCAGTATCTGAATTACTTACACCCTGGGCATTGATTTAGATGAGTGGAGTATGGCTACATACTACTTATTTGATGAGTCTGGTGAGTTTAAATTTGGC

TTCACATATGTATTGTTCTTTCTACCCCTCCAGATGAGGATGAAGAAGAAGGTTGATTGTGAAGAAGAAGAGTTTGAGCCATCAACTCAATATGAGTATGGTACTGAAGATG  
2760 2770 2780 2790 2800 2810 2820 2830 2840 2850 2860

Wild ORF1ab TTCACATATGTATTGTTCTTTCTACCCCTCCAGATGAGGATGAAGAAGAAGGTTGATTGTGAAGAAGAAGAGTTTGAGCCATCAACTCAATATGAGTATGGTACTGAAGATG  
Vac ORF1ab TTCACATATGTATTGTTCTTTCTACCCCTCCAGATGAGGATGAAGAAGAAGGTTGATTGTGAAGAAGAAGAGTTTGAGCCATCAACTCAATATGAGTATGGTACTGAAGATG

ATTACCAAGGTA AACCTTTTGGAAATTTGGTGGCCACTTCTGCTGCTCTTCAACCTGAAGAAGAGCAAGAAGAAGATTTGGTTAGATGATGATAGTCAACAAACTGTTGGTCAA  
2870 2880 2890 2900 2910 2920 2930 2940 2950 2960 2970

Wild ORF1ab ATTACCAAGGTA AACCTTTTGGAAATTTGGTGGCCACTTCTGCTGCTCTTCAACCTGAAGAAGAGCAAGAAGAAGATTTGGTTAGATGATGATAGTCAACAAACTGTTGGTCAA  
Vac ORF1ab ATTACCAAGGTA AACCTTTTGGAAATTTGGTGGCCACTTCTGCTGCTCTTCAACCTGAAGAAGAGCAAGAAGAAGATTTGGTTAGATGATGATAGTCAACAAACTGTTGGTCAA

CAAGACGGCAGTGGAGACAATCAGACAACCTACTATTCAAACAATTTGTTGAGGTTCAACCTCAATTAGAGATGGAACTTACACCAGTTGTTTCAGACTATTGAAGTGAATAG  
2980 2990 3000 3010 3020 3030 3040 3050 3060 3070 3080

Wild ORF1ab CAAGACGGCAGTGGAGACAATCAGACAACCTACTATTCAAACAATTTGTTGAGGTTCAACCTCAATTAGAGATGGAACTTACACCAGTTGTTTCAGACTATTGAAGTGAATAG  
Vac ORF1ab CAAGACGGCAGTGGAGACAATCAGACAACCTACTATTCAAACAATTTGTTGAGGTTCAACCTCAATTAGAGATGGAACTTACACCAGTTGTTTCAGACTATTGAAGTGAATAG

TTTTAGTGGTTATTTAAAACTTACTGACAATGTATACATTAAAAATGCAGACATTGTGGGAAGAAGCTAAAAAGGTA AAAACCAACAGTGGTTGTGTTAATGCAGCCAATGTTT  
3090 3100 3110 3120 3130 3140 3150 3160 3170 3180 3190

Wild ORF1ab TTTTAGTGGTTATTTAAAACTTACTGACAATGTATACATTAAAAATGCAGACATTGTGGGAAGAAGCTAAAAAGGTA AAAACCAACAGTGGTTGTGTTAATGCAGCCAATGTTT  
Vac ORF1ab TTTTAGTGGTTATTTAAAACTTACTGACAATGTATACATTAAAAATGCAGACATTGTGGGAAGAAGCTAAAAAGGTA AAAACCAACAGTGGTTGTGTTAATGCAGCCAATGTTT

ACCTTAAACATGGAGGAGGTTGTCAGGAGCCTTAAATAAGGCTACTAACAATGCCATGCAAGTTGAATCTGATGATTACATAGCTACTAATGGACCGCTTAAAGTGGGT  
3200 3210 3220 3230 3240 3250 3260 3270 3280 3290 3300

Wild ORF1ab ACCTTAAACATGGAGGAGGTTGTCAGGAGCCTTAAATAAGGCTACTAACAATGCCATGCAAGTTGAATCTGATGATTACATAGCTACTAATGGACCGCTTAAAGTGGGT  
Vac ORF1ab ACCTTAAACATGGAGGAGGTTGTCAGGAGCCTTAAATAAGGCTACTAACAATGCCATGCAAGTTGAATCTGATGATTACATAGCTACTAATGGACCACTTAAAGTGGGT

GGTAGTTGTGTTTTAAGCGGACACAATCTTGTCTAAACACTGTCTTCATGTTGTTCGGCCCAAATGTTAACAAAAGGTGAAGACATTCAACTTCTTAAGAGTGCCTTATGAAAA  
3310 3320 3330 3340 3350 3360 3370 3380 3390 3400 3410

Wild ORF1ab GGTAGTTGTGTTTTAAGCGGACACAATCTTGTCTAAACACTGTCTTCATGTTGTTCGGCCCAAATGTTAACAAAAGGTGAAGACATTCAACTTCTTAAGAGTGCCTTATGAAAA  
Vac ORF1ab GGTAGTTGTGTTTTAAGCGGACACAATCTTGTCTAAACACTGTCTTCATGTTGTTCGGCCCAAATGTTAACAAAAGGTGAAGACATTCAACTTCTTAAGAGTGCCTTATGAAAA

TTTTAATCAGCACGAAGTTCTACTTGCACCATTATTATCAGCTGGTATTTTTGGTGTGCTGACCCTATACATTCTTTAAGAGTTTGTGTAGATACTGTTCCGACAAAATGTCT  
3420 3430 3440 3450 3460 3470 3480 3490 3500 3510 3520

Wild ORF1ab TTTTAATCAGCACGAAGTTCTACTTGCACCATTATTATCAGCTGGTATTTTTGGTGTGCTGACCCTATACATTCTTTAAGAGTTTGTGTAGATACTGTTCCGACAAAATGTCT  
Vac ORF1ab TTTTAATCAGCACGAAGTTCTACTTGCACCATTATTATCAGCTGGTATTTTTGGTGTGCTGACCCTATACATTCTTTAAGAGTTTGTGTAGATACTGTTCCGACAAAATGTCT

ACTTAGCTGTCTTTGATAAAAAATCTCTATGACAAAACCTTGTCTTCAAGCTTTTTGGAAATGAAGAGTGA AAAAGCAAGTTGAACAAAAGATCGCTGAGATTCTTAAAGAGGAA  
3530 3540 3550 3560 3570 3580 3590 3600 3610 3620 3630

Wild ORF1ab ACTTAGCTGTCTTTGATAAAAAATCTCTATGACAAAACCTTGTCTTCAAGCTTTTTGGAAATGAAGAGTGA AAAAGCAAGTTGAACAAAAGATCGCTGAGATTCTTAAAGAGGAA  
Vac ORF1ab ACTTAGCTGTCTTTGATAAAAAATCTCTATGACAAAACCTTGTCTTCAAGCTTTTTGGAAATGAAGAGTGA AAAAGCAAGTTGAACAAAAGATCGCTGAGATTCTTAAAGAGGAA

GTTAAGCCATTTATAACTGAAAGTAAACCTTCAGTTGAACAGAGAAAACAAGATGATAAGAAAATCAAAGCTTGTGTTGAAGAAGTTACAACAACCTCTGGAAGAAACTAA  
3640 3650 3660 3670 3680 3690 3700 3710 3720 3730 3740

Wild ORF1ab GTTAAGCCATTTATAACTGAAAGTAAACCTTCAGTTGAACAGAGAAAACAAGATGATAAGAAAATCAAAGCTTGTGTTGAAGAAGTTACAACAACCTCTGGAAGAAACTAA  
Vac ORF1ab GTTAAGCCATTTATAACTGAAAGTAAACCTTCAGTTGAACAGAGAAAACAAGATGATAAGAAAATCAAAGCTTGTGTTGAAGAAGTTACAACAACCTCTGGAAGAAACTAA

GTTCCTCACAGAAAACCTTGTACTTTTATATTGACATTAATGGCAATCTTCATCCAGATTCTGCCACTCTTGTGTTAGTGAACATTGACATCACTTTCTTAAAGAAAGATGCTC  
3750 3760 3770 3780 3790 3800 3810 3820 3830 3840 3850

Wild ORF1ab GTTCCTCACAGAAAACCTTGTACTTTTATATTGACATTAATGGCAATCTTCATCCAGATTCTGCCACTCTTGTGTTAGTGAACATTGACATCACTTTCTTAAAGAAAGATGCTC  
Vac ORF1ab GTTCCTCACAGAAAACCTTGTACTTTTATATTGACATTAATGGCAATCTTCATCCAGATTCTGCCACTCTTGTGTTAGTGAACATTGACATCACTTTCTTAAAGAAAGATGCTC

CATATATAGTGGGTGATGTTGTTCAAGAGGGTGTITTTAACTGCTGTGGTTATAACCTACTAAAAAGGCTGGTGGCACTACTGAAATGCTAGCGAAAAGCTTTTGAGAAAAAGTG  
3860 3870 3880 3890 3900 3910 3920 3930 3940 3950 3960

Wild ORF1ab CATACATAGTGGGTGATGTTGTTCAAGAGGGTGTITTTAACTGCTGTGGTTATAACCTACTAAAAAGGCTGGTGGCACTACTGAAATGCTAGCGAAAAGCTTTTGAGAAAAAGTG  
Vac ORF1ab CATATATAGTGGGTGATGTTGTTCAAGAGGGTGTITTTAACTGCTGTGGTTATAACCTACTAAAAAGGCTGGTGGCACTACTGAAATGCTAGCGAAAAGCTTTTGAGAAAAAGTG

CCAACAGACAATTATATAACCACCTTACCCGGGTCAGGGTTTAAATGGTTACACTGTAGAGGAGGCAAAGACAGTGTCTTAAAAAGTGTAAAAGTGCCTTTTACATTCTACC  
3970 3980 3990 4000 4010 4020 4030 4040 4050 4060 4070

Wild ORF1ab CCAACAGACAATTATATAACCACCTTACCCGGGTCAGGGTTTAAATGGTTACACTGTAGAGGAGGCAAAGACAGTGTCTTAAAAAGTGTAAAAGTGCCTTTTACATTCTACC  
Vac ORF1ab CCAACAGACAATTATATAACCACCTTACCCGGGTCAGGGTTTAAATGGTTACACTGTAGAGGAGGCAAAGACAGTGTCTTAAAAAGTGTAAAAGTGCCTTTTACATTCTACC

ATCTATTATCTCTAATGAGAAGCAAGAAATTCCTGGAACTGTTTCTTGGAAATTTGCGAGAAATGCTCGCACATGCAGAAGAAACACGCAAATTAATGCCCTGCTGTGTGG  
4080 4090 4100 4110 4120 4130 4140 4150 4160 4170 4180

Wild ORF1ab ATCTATTATCTCTAATGAGAAGCAAGAAATTCCTGGAACTGTTTCTTGGAAATTTGCGAGAAATGCTCGCACATGCAGAAGAAACACGCAAATTAATGCCCTGCTGTGTGG  
Vac ORF1ab ATCTATTATCTCTAATGAGAAGCAAGAAATTCCTGGAACTGTTTCTTGGAAATTTGCGAGAAATGCTCGCACATGCAGAAGAAACACGCAAATTAATGCCCTGCTGTGTGG

AAACTAAAGCCATAGTTTCAACTATACAGCGTAAATATAAGGGTATTTAAAATACAAGAGGGTGTGGTTGATTTATGGTGTCTAGATTTTACTTTTACACCAGTAAAACAAC  
4190 4200 4210 4220 4230 4240 4250 4260 4270 4280 4290

Wild ORF1ab AAAC TAAAGCCATAGTTTCAACTATACAGCGTAAATATAAGGGTATTTAAAATACAAGAGGGTGTGGTTGATTTATGGTGTCTAGATTTTACTTTTACACCAGTAAAACAAC  
Vac ORF1ab AAAC TAAAGCCATAGTTTCAACTATACAGCGTAAATATAAGGGTATTTAAAATACAAGAGGGTGTGGTTGATTTATGGTGTCTAGATTTTACTTTTACACCAGTAAAACAAC

GTAGCGTCACCTTATCAACACACCTTAACGATCTAAATGAAACTCTTGTGTTACAATGCCACTTGGCTATGTTAACACATGGCTTTAAATTTGGAAGAAGCTGCTCGGTATATGAG  
4300 4310 4320 4330 4340 4350 4360 4370 4380 4390 4400

Wild ORF1ab GTAGCGTCACCTTATCAACACACCTTAACGATCTAAATGAAACTCTTGTGTTACAATGCCACTTGGCTATGTTAACACATGGCTTTAAATTTGGAAGAAGCTGCTCGGTATATGAG  
Vac ORF1ab GTAGCGTCACCTTATCAACACACCTTAACGATCTAAATGAAACTCTTGTGTTACAATGCCACTTGGCTATGTTAACACATGGCTTTAAATTTGGAAGAAGCTGCTCGGTATATGAG

ATCTCTCAAAGTGCCAGCTACAGTTTCTGTTTCTTCACCTGATGCTGTGTTACAGCGTATAATGGTTATCTTACTTCTTCTTCTAAAACACCTGAAGAACATTTTATTGAAA  
4410 4420 4430 4440 4450 4460 4470 4480 4490 4500 4510

Wild ORF1ab ATCTCTCAAAGTGCCAGCTACAGTTTCTGTTTCTTCACCTGATGCTGTGTTACAGCGTATAATGGTTATCTTACTTCTTCTTCTAAAACACCTGAAGAACATTTTATTGAAA  
Vac ORF1ab ATCTCTCAAAGTGCCAGCTACAGTTTCTGTTTCTTCACCTGATGCTGTGTTACAGCGTATAATGGTTATCTTACTTCTTCTTCTAAAACACCTGAAGAACATTTTATTGAAA

CCATCTCACTTGGCTGGTTCCTATAAAGATTGGTTCCTATTCTGGACAATCTACACAACCTAGGTATAGAATTTCTTAAAGAGAGGTGATAAAAAGTGTATATTACACTAGTAAT  
4520 4530 4540 4550 4560 4570 4580 4590 4600 4610 4620

Wild ORF1ab CCATCTCACTTGGCTGGTTCCTATAAAGATTGGTTCCTATTCTGGACAATCTACACAACCTAGGTATAGAATTTCTTAAAGAGAGGTGATAAAAAGTGTATATTACACTAGTAAT  
Vac ORF1ab CCATCTCACTTGGCTGGTTCCTATAAAGATTGGTTCCTATTCTGGACAATCTACACAACCTAGGTATAGAATTTCTTAAAGAGAGGTGATAAAAAGTGTATATTACACTAGTAAT

CCTACCACATTCCACCTAGATGGTGAAGTTATCACCTTTTGACAATCTTAAGACACTTCTTTCTTTTGAGAGAAGTIGAGGACTATTAAGGIGITTTACAACAGTAGACAACAT  
4630 4640 4650 4660 4670 4680 4690 4700 4710 4720 4730

Wild ORF1ab CCTACCACATTCCACCTAGATGGTGAAGTTATCACCTTTTGACAATCTTAAGACACTTCTTTCTTTTGAGAGAAGTIGAGGACTATTAAGGIGITTTACAACAGTAGACAACAT  
Vac ORF1ab CCTACCACATTCCACCTAGATGGTGAAGTTATCACCTTTTGACAATCTTAAGACACTTCTTTCTTTTGAGAGAAGTIGAGGACTATTAAGGIGITTTACAACAGTAGACAACAT

TAACCTCCACACGCAAGTTGTTGGGCATGTCAATGACATATGGACAACAGTTTGGTCCAACCTTATTTTIGATGGAGCTGATGTTACTAAAATAAAAACCTCATAATTCACATG  
4740 4750 4760 4770 4780 4790 4800 4810 4820 4830 4840

Wild ORF1ab TAACCTCCACACGCAAGTTGTTGGGCATGTCAATGACATATGGACAACAGTTTGGTCCAACCTTATTTTIGATGGAGCTGATGTTACTAAAATAAAAACCTCATAATTCACATG  
Vac ORF1ab TAACCTCCACACGCAAGTTGTTGGGCATGTCAATGACATATGGACAACAGTTTGGTCCAACCTTATTTTIGATGGAGCTGATGTTACTAAAATAAAAACCTCATAATTCACATG

AAGGTAAAACATTTTTATGTTTTACCTAATGATGACACTCTACGIGTTGAGGCCTTTTIGAGTACTACCACACAACCTGATCCTAGTTTTCTGGGTAGGTACATGTCAGCATTAA  
4850 4860 4870 4880 4890 4900 4910 4920 4930 4940 4950

Wild ORF1ab AAGGTAAAACATTTTTATGTTTTACCTAATGATGACACTCTACGIGTTGAGGCCTTTTIGAGTACTACCACACAACCTGATCCTAGTTTTCTGGGTAGGTACATGTCAGCATTAA  
Vac ORF1ab AAGGTAAAACATTTTTATGTTTTACCTAATGATGACACTCTACGIGTTGAGGCCTTTTIGAGTACTACCACACAACCTGATCCTAGTTTTCTGGGTAGGTACATGTCAGCATTAA

AATCACACTAAAAAGTGGAAATACCCACAAGTTAATGGTTTTAACTTCTATTTAAATGGGCAGATAACAACCTGTTATCTTGCCACTGCATTTGTTAACTCCAACAAATAGA  
4960 4970 4980 4990 5000 5010 5020 5030 5040 5050 5060

Wild ORF1ab AATCACACTAAAAAGTGGAAATACCCACAAGTTAATGGTTTTAACTTCTATTTAAATGGGCAGATAACAACCTGTTATCTTGCCACTGCATTTGTTAACTCCAACAAATAGA  
Vac ORF1ab AATCACACTAAAAAGTGGAAATACCCACAAGTTAATGGTTTTAACTTCTATTTAAATGGGCAGATAACAACCTGTTATCTTGCCACTGCATTTGTTAACTCCAACAAATAGA

GTTGAAGTTTAAATCCACCTGCTCTACAAGATGCTTATTACAGAGCAAGGGCTGGTGAAGCTGCTAACTTTTIGTGCATTTATCTTAGCCTACTGTAATAAGACAGTAGGTG  
5070 5080 5090 5100 5110 5120 5130 5140 5150 5160 5170

Wild ORF1ab GTTGAAGTTTAAATCCACCTGCTCTACAAGATGCTTATTACAGAGCAAGGGCTGGTGAAGCTGCTAACTTTTIGTGCATTTATCTTAGCCTACTGTAATAAGACAGTAGGTG  
Vac ORF1ab GTTGAAGTTTAAATCCACCTGCTCTACAAGATGCTTATTACAGAGCAAGGGCTGGTGAAGCTGCTAACTTTTIGTGCATTTATCTTAGCCTACTGTAATAAGACAGTAGGTG

AGTTAGGTGATGTTAGAGAAACAATGAGTTACTTGTTTCAACATGCCAATTTAGATTCTTGCAAAAAGAGTCTTGAACGTGGTGTGTAAAACCTTGTGGACAACAGCAGACA  
5180 5190 5200 5210 5220 5230 5240 5250 5260 5270 5280

Wild ORF1ab AGTTAGGTGATGTTAGAGAAACAATGAGTTACTTGTTTCAACATGCCAATTTAGATTCTTGCAAAAAGAGTCTTGAACGTGGTGTGTAAAACCTTGTGGACAACAGCAGACA  
Vac ORF1ab AGTTAGGTGATGTTAGAGAAACAATGAGTTACTTGTTTCAACATGCCAATTTAGATTCTTGCAAAAAGAGTCTTGAACGTGGTGTGTAAAACCTTGTGGACAACAGCAGACA

ACCCTTAAGGGTGTAGAAGCTGTTATGTACATGGGCACACTTTCCTTATGAACAATTTAAGAAAGGTTTCAGATACCTTGTACGTTGGTAAACAAGCTACAAAATATCT  
5290 5300 5310 5320 5330 5340 5350 5360 5370 5380 5390

Wild ORF1ab ACCCTTAAGGGTGTAGAAGCTGTTATGTACATGGGCACACTTTCCTTATGAACAATTTAAGAAAGGTTTCAGATACCTTGTACGTTGGTAAACAAGCTACAAAATATCT  
Vac ORF1ab ACCCTTAAGGGTGTAGAAGCTGTTATGTACATGGGCACACTTTCCTTATGAACAATTTAAGAAAGGTTTCAGATACCTTGTACGTTGGTAAACAAGCTACAAAATATCT

AGTACAACAGGAGTCACCTTTTGTATGATGTCAGCACCACCTGCTCAGTATGAACTTAAGCATGGTACATTTACTTTGTGCTAGTGAGTACACTGGTAATTACCAGTGTG  
5400 5410 5420 5430 5440 5450 5460 5470 5480 5490 5500

Wild ORF1ab AGTACAACAGGAGTCACCTTTTGTATGATGTCAGCACCACCTGCTCAGTATGAACTTAAGCATGGTACATTTACTTTGTGCTAGTGAGTACACTGGTAATTACCAGTGTG  
Vac ORF1ab AGTACAACAGGAGTCACCTTTTGTATGATGTCAGCACCACCTGCTCAGTATGAACTTAAGCATGGTACATTTACTTTGTGCTAGTGAGTACACTGGTAATTACCAGTGTG

GTCACTATAAACATATAACTTCTAAAGAACTTTGTATTGCATAGACGGTGTCTTACTTTACAAAGTCTCAGAATACAAAGGTCCTATTACGGATGTTTTCTACAAAGAA  
5510 5520 5530 5540 5550 5560 5570 5580 5590 5600 5610

Wild ORF1ab GTCACTATAAACATATAACTTCTAAAGAACTTTGTATTGCATAGACGGTGTCTTACTTTACAAAGTCTCAGAATACAAAGGTCCTATTACGGATGTTTTCTACAAAGAA  
Vac ORF1ab GTCACTATAAACATATAACTTCTAAAGAACTTTGTATTGCATAGACGGTGTCTTACTTTACAAAGTCTCAGAATACAAAGGTCCTATTACGGATGTTTTCTACAAAGAA

AACAGTTACACAACAACCATAAAAACCAGTTACTTTATAAAATTTGGATGGTGTGTTGTTGTACAGAAAATGACCCTAAGTTGGACAATTTATTATAAGAAAAGACAATTTCTTATTT  
5620 5630 5640 5650 5660 5670 5680 5690 5700 5710 5720

Wild ORF1ab AACAGTTACACAACAACCATAAAAACCAGTTACTTTATAAAATTTGGATGGTGTGTTGTTGTACAGAAAATGACCCTAAGTTGGACAATTTATTATAAGAAAAGACAATTTCTTATTT  
Vac ORF1ab AACAGTTACACAACAACCATAAAAACCAGTTACTTTATAAAATTTGGATGGTGTGTTGTTGTACAGAAAATGACCCTAAGTTGGACAATTTATTATAAGAAAAGACAATTTCTTATTT

CACAGAGCAACCAATTGATCTTGTACCAAACCAACCATATCCAAGCGCAAGCTTCGATAAATTTAAGTTTGTATGTGATAAATATCAAATTTGCTGATGATTTAAACCAGT  
5730 5740 5750 5760 5770 5780 5790 5800 5810 5820 5830

Wild ORF1ab CACAGAGCAACCAATTGATCTTGTACCAAACCAACCATATCCAAGCGCAAGCTTCGATAAATTTAAGTTTGTATGTGATAAATATCAAATTTGCTGATGATTTAAACCAGT  
Vac ORF1ab CACAGAGCAACCAATTGATCTTGTACCAAACCAACCATATCCAAGCGCAAGCTTCGATAAATTTAAGTTTGTATGTGATAAATATCAAATTTGCTGATGATTTAAACCAGT

TAACTGGTTATAAGAAACCTGCTTCAAGAGAGCTTAAAGTTACATTTTTCCCTGACTTAAATGGTGTGATGTTGGTGGCTATTGATTATAAAACACTACACACCCCTCTTTTAAG  
5840 5850 5860 5870 5880 5890 5900 5910 5920 5930 5940

Wild ORF1ab TAACTGGTTATAAGAAACCTGCTTCAAGAGAGCTTAAAGTTACATTTTTCCCTGACTTAAATGGTGTGATGTTGGTGGCTATTGATTATAAAACACTACACACCCCTCTTTTAAG  
Vac ORF1ab TAACTGGTTATAAGAAACCTGCTTCAAGAGAGCTTAAAGTTACATTTTTCCCTGACTTAAATGGTGTGATGTTGGTGGCTATTGATTATAAAACACTACACACCCCTCTTTTAAG

AAAGGAGCTAAATTTGTTACATAAACCTATTGTTTGGCATGTTAACAATGCAACTAATAAAGCCACGTATAAACCAAATACCTGGTGTATACGTTGTCTTTTGGAGCACAAA  
5950 5960 5970 5980 5990 6000 6010 6020 6030 6040 6050

Wild ORF1ab AAAGGAGCTAAATTTGTTACATAAACCTATTGTTTGGCATGTTAACAATGCAACTAATAAAGCCACGTATAAACCAAATACCTGGTGTATACGTTGTCTTTTGGAGCACAAA  
Vac ORF1ab AAAGGAGCTAAATTTGTTACATAAACCTATTGTTTGGCATGTTAACAATGCAACTAATAAAGCCACGTATAAACCAAATACCTGGTGTATACGTTGTCTTTTGGAGCACAAA

ACCAGTTGAAACATCAAATTCGTTTGTATGTTACTGAAGTCAGAGGACGCGCAGGGAATGGATAATCTTGCTTGCAGGATCTAAAACCAGTCTCTGAAGAAGTAGTGGAAA  
6060 6070 6080 6090 6100 6110 6120 6130 6140 6150 6160

Wild ORF1ab ACCAGTTGAAACATCAAATTCGTTTGTATGTTACTGAAGTCAGAGGACGCGCAGGGAATGGATAATCTTGCTTGCAGGATCTAAAACCAGTCTCTGAAGAAGTAGTGGAAA  
Vac ORF1ab ACCAGTTGAAACATCAAATTCGTTTGTATGTTACTGAAGTCAGAGGACGCGCAGGGAATGGATAATCTTGCTTGCAGGATCTAAAACCAGTCTCTGAAGAAGTAGTGGAAA

ATCCTACCATACAGAAAGACGTTCTTGAGTGTAAATGTGAAAACTACCGAAGTTGTAGGAGACATTATACTTAAACCAGCGAATAATAGTTTAAAAAATTACAGAAGAGGTT  
6170 6180 6190 6200 6210 6220 6230 6240 6250 6260 6270

Wild ORF1ab ATCCTACCATACAGAAAGACGTTCTTGAGTGTAAATGTGAAAACTACCGAAGTTGTAGGAGACATTATACTTAAACCAGCGAATAATAGTTTAAAAAATTACAGAAGAGGTT  
Vac ORF1ab ATCCTACCATACAGAAAGACGTTCTTGAGTGTAAATGTGAAAACTACCGAAGTTGTAGGAGACATTATACTTAAACCAGCAAATAATAGTTTAAAAAATTACAGAAGAGGTT

GGCCACACAGATCTAATGGCTGCTTATGTAGACAATTCCTAGICTTACTATTAAGAAACCTAATGAATTTATCTAGAGTATTAGGTTTGAAAACCCCTTGCTACTCATGGTTT  
6280 6290 6300 6310 6320 6330 6340 6350 6360 6370 6380

Wild ORF1ab GGCCACACAGATCTAATGGCTGCTTATGTAGACAATTCCTAGICTTACTATTAAGAAACCTAATGAATTTATCTAGAGTATTAGGTTTGAAAACCCCTTGCTACTCATGGTTT  
Vac ORF1ab GGCCACACAGATCTAATGGCTGCTTATGTAGACAATTCCTAGICTTACTATTAAGAAACCTAATGAATTTATCTAGAGTATTAGGTTTGAAAACCCCTTGCTACTCATGGTTT

AGCTGCTGTTAATAGTGTCCCTTGGGATACTATAGCTAATTTATGCTAAGCCTTTTCTTAACAAAAGTTGTTAGTACAACCTACTAACATAGTTACACGGTGTTTAAACCGTG  
6390 6400 6410 6420 6430 6440 6450 6460 6470 6480 6490

Wild ORF1ab AGCTGCTGTTAATAGTGTCCCTTGGGATACTATAGCTAATTTATGCTAAGCCTTTTCTTAACAAAAGTTGTTAGTACAACCTACTAACATAGTTACACGGTGTTTAAACCGTG  
Vac ORF1ab AGCTGCTGTTAATAGTGTCCCTTGGGATACTATAGCTAATTTATGCTAAGCCTTTTCTTAACAAAAGTTGTTAGTACAACCTACTAACATAGTTACACGGTGTTTAAACCGTG

TTTGTACTAATTATATGCCTTATTTCTTTACTTTTATGCTACAATTTGTTGTTACTTTTACTAGAAGTACAAAATCTAGAATTTAAAGCATCTATGCCGACTACTATAGCAAAG  
6500 6510 6520 6530 6540 6550 6560 6570 6580 6590 6600

Wild ORF1ab TTTGTACTAATTATATGCCTTATTTCTTTACTTTTATGCTACAATTTGTTGTTACTTTTACTAGAAGTACAAAATCTAGAATTTAAAGCATCTATGCCGACTACTATAGCAAAG  
Vac ORF1ab TTTGTACTAATTATATGCCTTATTTCTTTACTTTTATGCTACAATTTGTTGTTACTTTTACTAGAAGTACAAAATCTAGAATTTAAAGCATCTATGCCGACTACTATAGCAAAG

AATACTGTTAAGAGTGTCCGTTAAATTTTGTCTAGAGGCTTCATTTAATTTATTTGAAGTACCTAATTTTTCTAAACTGATAAATATTATAATTTGGTTTTTACTATTTAAG  
6610 6620 6630 6640 6650 6660 6670 6680 6690 6700 6710

Wild ORF1ab AATACTGTTAAGAGTGTCCGTTAAATTTTGTCTAGAGGCTTCATTTAATTTATTTGAAGTACCTAATTTTTCTAAACTGATAAATATTATAATTTGGTTTTTACTATTTAAG  
Vac ORF1ab AATACTGTTAAGAGTGTCCGTTAAATTTTGTCTAGAGGCTTCATTTAATTTATTTGAAGTACCTAATTTTTCTAAACTGATAAATATTATAATTTGGTTTTTACTATTTAAG

TGTTTTGCCTAGGTTCTTTAATCTACTCAACCGCTGCTTTAGGTGTTTTAATGTCTAATTTAGGCATGCCTTCTTACTGTACTGGTTACAGAGAAGGCTATTTGAACTCTA  
6720 6730 6740 6750 6760 6770 6780 6790 6800 6810 6820

Wild ORF1ab TGTTTTGCCTAGGTTCTTTAATCTACTCAACCGCTGCTTTAGGTGTTTTAATGTCTAATTTAGGCATGCCTTCTTACTGTACTGGTTACAGAGAAGGCTATTTGAACTCTA  
Vac ORF1ab TGTTTTGCCTAGGTTCTTTAATCTACTCAACCGCTGCTTTAGGTGTTTTAATGTCTAATTTAGGCATGCCTTCTTACTGTACTGGTTACAGAGAAGGCTATTTGAACTCTA

CTAATGTCACTATTGCAACCTACTGTACTGGTTCTATACCTTGTAGTGTGTTGCTTTAGTGGTTAGATTCTTTAGACACCTATCCTTCTTTAGAACTATACAAATTACC  
6830 6840 6850 6860 6870 6880 6890 6900 6910 6920 6930

Wild ORF1ab CTAATGTCACTATTGCAACCTACTGTACTGGTTCTATACCTTGTAGTGTGTTGCTTTAGTGGTTAGATTCTTTAGACACCTATCCTTCTTTAGAACTATACAAATTACC  
Vac ORF1ab CTAATGTCACTATTGCAACCTACTGTACTGGTTCTATACCTTGTAGTGTGTTGCTTTAGTGGTTAGATTCTTTAGACACCTATCCTTCTTTAGAACTATACAAATTACC

ATTTTCATCTTTTAAATGGGATTTAACTGCTTTTGGCTTAGTTGCAGAGTGGTTTTTGGCATATAATTCCTTTTCACTAGGTTTTTCTATGFACTTGGATTGGCTGCAATCAT  
6940 6950 6960 6970 6980 6990 7000 7010 7020 7030 7040

Wild ORF1ab ATCTCATCTTTTAAATGGGATTTAACTGCTTTTGGCTTAGTTGCAGAGTGGTTTTTGGCATATAATTCCTTTTCACTAGGTTTTTCTATGFACTTGGATTGGCTGCAATCAT  
Vac ORF1ab ATTTTCATCTTTTAAATGGGATTTAACTGCTTTTGGCTTAGTTGCAGAGTGGTTTTTGGCATATAATTCCTTTTCACTAGGTTTTTCTATGFACTTGGATTGGCTGCAATCAT

GCAATTGTTTTTCAGCTATTTTGCAGTACATTTTATTAGTAAATCTTGGCTTATGTTGGTTAATAATTAATCTTGTACAAATGGCCCCGATTTTCAGCTATGGTTAGAATGT  
7050 7060 7070 7080 7090 7100 7110 7120 7130 7140 7150

Wild ORF1ab GCAATTGTTTTTCAGCTATTTTGCAGTACATTTTATTAGTAAATCTTGGCTTATGTTGGTTAATAATTAATCTTGCACAAATGGCCCCGATTTTCAGCTATGGTTAGAATGT  
Vac ORF1ab GCAATTGTTTTTCAGCTATTTTGCAGTACATTTTATTAGTAAATCTTGGCTTATGTTGGTTAATAATTAATCTTGTACAAATGGCCCCGATTTTCAGCTATGGTTAGAATGT

ACATCTTCTTTTGCATCATTTTATTATGTATGGAAAAGTTATGTGTCATGTTGTAGACGGTTGTAAATTCATCAACTTGTATGATGTGTTACAAACGTAATAGAGCAACAAGA  
7160 7170 7180 7190 7200 7210 7220 7230 7240 7250 7260

Wild ORF1ab ACATCTTCTTTTGCATCATTTTATTATGTATGGAAAAGTTATGTGTCATGTTGTAGACGGTTGTAAATTCATCAACTTGTATGATGTGTTACAAACGTAATAGAGCAACAAGA  
Vac ORF1ab ACATCTTCTTTTGCATCATTTTATTATGTATGGAAAAGTTATGTGTCATGTTGTAGACGGTTGTAAATTCATCAACTTGTATGATGTGTTACAAACGTAATAGAGCAACAAGA

GTCGAATGTACAACCTATTGTTAATGGTGTAGAAAGTCCTTTTATGTCCTATGCTAATGGAGGTAAGGCTTTTGCAAACTACACAATTTGGAATTGTGTTAATTGTGATAC  
7270 7280 7290 7300 7310 7320 7330 7340 7350 7360 7370

Wild ORF1ab GTCGAATGTACAACCTATTGTTAATGGTGTAGAAAGTCCTTTTATGTCCTACGCTAATGGAGGTAAGGCTTTTGCAAACTACACAATTTGGAATTGTGTTAATTGTGATAC  
Vac ORF1ab GTCGAATGTACAACCTATTGTTAATGGTGTAGAAAGTCCTTTTATGTCCTATGCTAATGGAGGTAAGGCTTTTGCAAACTACACAATTTGGAATTGTGTTAATTGTGATAC

ATTCTGTGCTGGTAGTACATTTATTAGTGAAGTTGCGAGAGACTTGTACTACAGTTTTAAAAGACCAATAAATCCTACTGACCAGTCTTCTTACATCGTTGATAGTG  
7380 7390 7400 7410 7420 7430 7440 7450 7460 7470 7480

Wild ORF1ab ATTCTGTGCTGGTAGTACATTTATTAGTGAAGTTGCGAGAGACTTATCACTACAGTTTTAAAAGACCAATAAATCCTACTGACCAGTCTTCTTACATCGTTGATAGTG  
Vac ORF1ab ATTCTGTGCTGGTAGTACATTTATTAGTGAAGTTGCGAGAGACTTGTACTACAGTTTTAAAAGACCAATAAATCCTACTGACCAGTCTTCTTACATCGTTGATAGTG

TTACAGTGAAGAATGGTTCCATCCATCTTTACTTTTGATAAAGCTGGTCAAAAAGACTTATGAAAGACATTCCTCTCTCTCATTTTGTAACTTAGACAACCTGAGAGCTAAT  
7490 7500 7510 7520 7530 7540 7550 7560 7570 7580 7590

Wild ORF1ab TTACAGTGAAGAATGGTTCCATCCATCTTTACTTTTGATAAAGCTGGTCAAAAAGACTTATGAAAGACATTCCTCTCTCTCATTTTGTAACTTAGACAACCTGAGAGCTAAT  
Vac ORF1ab TTACAGTGAAGAATGGTTCCATCCATCTTTACTTTTGATAAAGCTGGTCAAAAAGACTTATGAAAGACATTCCTCTCTCTCATTTTGTAACTTAGACAACCTGAGAGCTAAT

AACACTAAAGGTTTCATTTGCTATTAAATGTTATAGTTTTTIGATGGTAAATCAAATGTTGAAGAATCATCTGCAAAATCAGCGTCTGTTTACTACAGTCAGCTTATGTGICA  
7600 7610 7620 7630 7640 7650 7660 7670 7680 7690 7700

Wild ORF1ab AACACTAAAGGTTTCATTTGCTATTAAATGTTATAGTTTTTIGATGGTAAATCAAATGTTGAAGAATCATCTGCAAAATCAGCGTCTGTTTACTACAGTCAGCTTATGTGICA  
Vac ORF1ab AACACTAAAGGTTTCATTTGCTATTAAATGTTATAGTTTTTIGATGGTAAATCAAATGTTGAAGAATCATCTGCAAAATCAGCGTCTGTTTACTACAGTCAGCTTATGTGICA



ACCTATACTGTTACTAGATCAGGCATTAGTGTCTGATGTTGGTGATAGTGCGGAAGTTGCAGTTAAAAATGTTTGATGCTTACGTTAATACGTTTTTCATCAACTTTTTAAACG  
7710 7720 7730 7740 7750 7760 7770 7780 7790 7800 7810

Wild ORF1ab ACCTATACTGTTACTAGATCAGGCATTAGTGTCTGATGTTGGTGATAGTGC

Vac ORF1ab ACCTATACTGTTACTAGATCAGGCATTAGTGTCTGATGTTGGTGATAGTGC

TACCAATGGAAAAACTCAAACACTAGTTGCAACTGCAGAAGCTGAACTTGCAAAGAATGTGTCCTTAGACAATGTCCTTATCTACTTTTATTTTCAGCAGCTCGGCAAGGG  
7820 7830 7840 7850 7860 7870 7880 7890 7900 7910 7920

Wild ORF1ab TACCAATGGAAAAACTCAAACACTAGTTGCAACTGCAGAAGCTGAACTTGCAAAGAATG

Vac ORF1ab TACCAATGGAAAAACTCAAACACTAGTTGCAACTGCAGAAGCTGAACTTGCAAAGAATG

TTTGTTGATTCAGATGTAGAAACTAAAGATGTTGTTGAATGTCTAAAATGTCACATCAATCTGACATAGAAGTTACTGGCGATAGTTGTAATAACTATATGCTCACCTA  
7930 7940 7950 7960 7970 7980 7990 8000 8010 8020 8030

Wild ORF1ab TTTGTTGATTCAGATGTAGAAACTAAAGATGTTGTTGAATGTC

Vac ORF1ab TTTGTTGATTCAGATGTAGAAACTAAAGATGTTGTTGAATGTC

TAACAAAGTTGAAAACATGACACCCCGTGACCTTGGTGCTTGTATTGACTGTAGTGCCGTCATATTAATGCGCAGGTAGCAAAAAGTCACAACATTGCTTTTGATATGGA  
8040 8050 8060 8070 8080 8090 8100 8110 8120 8130 8140

Wild ORF1ab CAACAAAGTTGAAAACATGACACCCCGTGACCTTGGTGCTTGTATTGACTGT

Vac ORF1ab TAACAAAGTTGAAAACATGACACCCCGTGACCTTGGTGCTTGTATTGACTGT

ACGTTAAAGATTTTCATGTCATTGTCGAACAACCTACGAAAAACAAATACGTAGTGTCTAAAAAGAATAACTTACCTTTTTAAGTTGACATGTGCAACTACTAGACAAGTT  
8150 8160 8170 8180 8190 8200 8210 8220 8230 8240 8250

Wild ORF1ab ACGTTAAAGATTTTCATGTCATTGTCGAACAACCTACGAAAAACAAATACG

Vac ORF1ab ACGTTAAAGATTTTCATGTCATTGTCGAACAACCTACGAAAAACAAATACG

GTTAATGTTGTAACAACAAAGATAGCACCTTAAGGGTGGTAAAAATGTTAATAATTGGTTGAAGCAGTTAATTTAAAGTTACACTTGTGTTCCTTTTTGTGCTGCTATTTT  
8260 8270 8280 8290 8300 8310 8320 8330 8340 8350 8360

Wild ORF1ab GTTAATGTTGTAACAACAAAGATAGCACCTTAAGGGTGGTAAAAATGTTAATAAT

Vac ORF1ab GTTAATGTTGTAACAACAAAGATAGCACCTTAAGGGTGGTAAAAATGTTAATAAT

CTATTTAATAACACCTGTTTCATGTCATGTCTAAACATACTGACTTTTCAAGTGAATCATAGGATACAAGGCTATTGATGGTGGTGTCACTCGTGACATAGCATCTACAG  
8370 8380 8390 8400 8410 8420 8430 8440 8450 8460 8470

Wild ORF1ab CTATTTAATAACACCTGTTTCATGTCATGTC

Vac ORF1ab CTATTTAATAACACCTGTTTCATGTCATGTC

ATAC TTG TTT TGG CTAACAAACATGCTGATTTTGGACACATGGTTT TAGTCAGCGTGGTGGTAGTTATACTAATGACAAAAGCTTGCCCATTTGATTGCTGCAGTCATAACAAGA  
8480 8490 8500 8510 8520 8530 8540 8550 8560 8570 8580

Wild ORF1ab ATAC TTG TTT TGG CTAACAAACATGCTGATTTTGGACACATGGTTT TAGTCAGCGTGGTGGTAGTTATACTAATGACAAAAGCTTGCCCATTTGATTGCTGCAGTCATAACAAGA  
Vac ORF1ab ATAC TTG TTT TGG CTAACAAACATGCTGATTTTGGACACATGGTTT TAGTCAGCGTGGTGGTAGTTATACTAATGACAAAAGCTTGCCCATTTGATTGCTGCAGTCATAACAAGA

GAAGTGGGTTTTGTCGTGCTGGTTTGGCTGGCACGATATTACGCACAAC TAATGGTGGTGGTGGTAGTTATACTAATGACAAAAGCTTGCCCATTTGATTGCTGCAGTCATAACAAGA  
8590 8600 8610 8620 8630 8640 8650 8660 8670 8680 8690

Wild ORF1ab GAAGTGGGTTTTGTCGTGCTGGTTTGGCTGGCACGATATTACGCACAAC TAATGGTGGTGGTGGTAGTTATACTAATGACAAAAGCTTGCCCATTTGATTGCTGCAGTCATAACAAGA  
Vac ORF1ab GAAGTGGGTTTTGTCGTGCTGGTTTGGCTGGCACGATATTACGCACAAC TAATGGTGGTGGTGGTAGTTATACTAATGACAAAAGCTTGCCCATTTGATTGCTGCAGTCATAACAAGA

CACACCATCAAAAC TTATAGAGTACACTGACTTTTGCAACATCAGCTTGGTGGTGGTGGTAGTTATACTAATGACAAAAGCTTGCCCATTTGATTGCTGCAGTCATAACAAGA  
8700 8710 8720 8730 8740 8750 8760 8770 8780 8790 8800

Wild ORF1ab CACACCATCAAAAC TTATAGAGTACACTGACTTTTGCAACATCAGCTTGGTGGTGGTGGTAGTTATACTAATGACAAAAGCTTGCCCATTTGATTGCTGCAGTCATAACAAGA  
Vac ORF1ab CACACCATCAAAAC TTATAGAGTACACTGACTTTTGCAACATCAGCTTGGTGGTGGTGGTAGTTATACTAATGACAAAAGCTTGCCCATTTGATTGCTGCAGTCATAACAAGA

ATGATACCAATG TACTAGAAAGTTCTGTGCTTATGAAAGTTTACGCCCTGACACACGTTATGTGCTCATGGATGGCTCTATTTCAATTTCTTAACACCTACCTTGAA  
8810 8820 8830 8840 8850 8860 8870 8880 8890 8900 8910

Wild ORF1ab ATGATACCAATG TACTAGAAAGTTCTGTGCTTATGAAAGTTTACGCCCTGACACACGTTATGTGCTCATGGATGGCTCTATTTCAATTTCTTAACACCTACCTTGAA  
Vac ORF1ab ATGATACCAATG TACTAGAAAGTTCTGTGCTTATGAAAGTTTACGCCCTGACACACGTTATGTGCTCATGGATGGCTCTATTTCAATTTCTTAACACCTACCTTGAA

GGTTCGTGTTAGAGTGGTAAACAAC TTTTGATTCTGAGTACTGTGGGCACGGCACTTTGIGAAAGATCAGAAGCTGGTGGTGGTGGTAGTTATACTAATGACAAAAGCTTGCCCATTTGATTGCTGCAGTCATAACAAGA  
8920 8930 8940 8950 8960 8970 8980 8990 9000 9010 9020

Wild ORF1ab GGTTCGTGTTAGAGTGGTAAACAAC TTTTGATTCTGAGTACTGTGGGCACGGCACTTTGIGAAAGATCAGAAGCTGGTGGTGGTGGTAGTTATACTAATGACAAAAGCTTGCCCATTTGATTGCTGCAGTCATAACAAGA  
Vac ORF1ab GGTTCGTGTTAGAGTGGTAAACAAC TTTTGATTCTGAGTACTGTGGGCACGGCACTTTGIGAAAGATCAGAAGCTGGTGGTGGTGGTAGTTATACTAATGACAAAAGCTTGCCCATTTGATTGCTGCAGTCATAACAAGA

CAATGATTATTACAGATCTTTACCAGGAGTTTCTGTGGTGGTGGTAGTTATACTAATGACAAAAGCTTGCCCATTTGATTGCTGCAGTCATAACAAGA  
9030 9040 9050 9060 9070 9080 9090 9100 9110 9120 9130

Wild ORF1ab CAATGATTATTACAGATCTTTACCAGGAGTTTCTGTGGTGGTGGTAGTTATACTAATGACAAAAGCTTGCCCATTTGATTGCTGCAGTCATAACAAGA  
Vac ORF1ab CAATGATTATTACAGATCTTTACCAGGAGTTTCTGTGGTGGTGGTAGTTATACTAATGACAAAAGCTTGCCCATTTGATTGCTGCAGTCATAACAAGA

CAGCATCTATAGTAGCTGGTGGTATTGTAGCTATCGTAGTAAACATGCC TTGCCTACTATTTTATGAGGTTTAGAAGAGCTTTTGGTGAATACAGTCATGTAGTTGCC TTT  
9140 9150 9160 9170 9180 9190 9200 9210 9220 9230 9240

Wild ORF1ab CAGCATCTATAGTAGCTGGTGGTATTGTAGCTATCGTAGTAAACATGCC TTGCCTACTATTTTATGAGGTTTAGAAGAGCTTTTGGTGAATACAGTCATGTAGTTGCC TTT  
Vac ORF1ab CAGCATCTATAGTAGCTGGTGGTATTGTAGCTATCGTAGTAAACATGCC TTGCCTACTATTTTATGAGGTTTAGAAGAGCTTTTGGTGAATACAGTCATGTAGTTGCC TTT

AATACTTTACTATTCCCTTATGTCATTCACTGTAICTCTGTTTAAACACCAGTTTACTCATTCTTACCTGGTGTGTTTATTCTGTTATTTACTTTGTACTTTGACATTTTATCTTAC  
9250 9260 9270 9280 9290 9300 9310 9320 9330 9340 9350

Wild ORF1ab AATACTTTACTATTCCCTTATGTCATTCACTGTAICTCTGTTTAAACACCAGTTTACTCATTCTTACCTGGTGTGTTTATTCTGTTATTTACTTTGTACTTTGACATTTTATCTTAC  
Vac ORF1ab AATACTTTACTATTCCCTTATGTCATTCACTGTAICTCTGTTTAAACACCAGTTTACTCATTCTTACCTGGTGTGTTTATTCTGTTATTTACTTTGTACTTTGACATTTTATCTTAC

TAATGATGTTTCCTTTTTTAGCACATATTCAGTGGATGGTTATGTTTCACACCTTTAGTACCTTTCTGGATAACAATTGCTTTATATCATTTGTATTTCCACAAAGCATTTCCT  
9360 9370 9380 9390 9400 9410 9420 9430 9440 9450 9460

Wild ORF1ab TAATGATGTTTCCTTTTTTAGCACATATTCAGTGGATGGTTATGTTTCACACCTTTAGTACCTTTCTGGATAACAATTGCTTTATATCATTTGTATTTCCACAAAGCATTTCCT  
Vac ORF1ab TAATGATGTTTCCTTTTTTAGCACATATTCAGTGGATGGTTATGTTTCACACCTTTAGTACCTTTCTGGATAACAATTGCTTTATATCATTTGTATTTCCACAAAGCATTTCCT

ATTGGTTCCTTTAGTAAATTACCTAAAGAGACGTTGTAICTTTTAAATGGTGTGTTTCCCTTTAGTACTTTTGAAGAAGCTGCGCTGTGCACCTTTTTGTAAATAAAGAAATGTAT  
9470 9480 9490 9500 9510 9520 9530 9540 9550 9560 9570

Wild ORF1ab ATTGGTTCCTTTAGTAAATTACCTAAAGAGACGTTGTAICTTTTAAATGGTGTGTTTCCCTTTAGTACTTTTGAAGAAGCTGCGCTGTGCACCTTTTTGTAAATAAAGAAATGTAT  
Vac ORF1ab ATTGGTTCCTTTAGTAAATTACCTAAAGAGACGTTGTAICTTTTAAATGGTGTGTTTCCCTTTAGTACTTTTGAAGAAGCTGCGCTGTGCACCTTTTTGTAAATAAAGAAATGTAT

CTAAAGTTGCGTAGTGATGTGCTATTACCTCTTACGCAATATAATAGATACTTAGCTCTTTATAATAAGTACAAGTATTTTAGTGGAGCAATGGATAACAAGTACTAGCTACAG  
9580 9590 9600 9610 9620 9630 9640 9650 9660 9670 9680

Wild ORF1ab CTAAAGTTGCGTAGTGATGTGCTATTACCTCTTACGCAATATAATAGATACTTAGCTCTTTATAATAAGTACAAGTATTTTAGTGGAGCAATGGATAACAAGTACTAGCTACAG  
Vac ORF1ab CTAAAGTTGCGTAGTGATGTGCTATTACCTCTTACGCAATATAATAGATACTTAGCTCTTTATAATAAGTACAAGTATTTTAGTGGAGCAATGGATAACAAGTACTAGCTACAG

AGAAGCTGCTTTGTTGTCATCTCGCAAAGGCTCTCAATGACTTCAGTAACTCAGGTTCTGATGTTCTTTACCAACCACCACAAACCTCTATCACCTCAGCTGTTTTGCAGA  
9690 9700 9710 9720 9730 9740 9750 9760 9770 9780 9790

Wild ORF1ab AGAAGCTGCTTTGTTGTCATCTCGCAAAGGCTCTCAATGACTTCAGTAACTCAGGTTCTGATGTTCTTTACCAACCACCACAAACCTCTATCACCTCAGCTGTTTTGCAGA  
Vac ORF1ab AGAAGCTGCTTTGTTGTCATCTCGCAAAGGCTCTCAATGACTTCAGTAACTCAGGTTCTGATGTTCTTTACCAACCACCACAAACCTCTATCACCTCAGCTGTTTTGCAGA

GTTGGTTTTAGAAAAATGGCATTCCCATCTGGTAAAGTTGAGGGTTGTATGGTACAAGTAACTTTGTGGTACAACCTACACTTTAACGGTCTTTGGCTTTGATGACGTAGTTTTAC  
9800 9810 9820 9830 9840 9850 9860 9870 9880 9890 9900

Wild ORF1ab GTTGGTTTTAGAAAAATGGCATTCCCATCTGGTAAAGTTGAGGGTTGTATGGTACAAGTAACTTTGTGGTACAACCTACACTTTAACGGTCTTTGGCTTTGATGACGTAGTTTTAC  
Vac ORF1ab GTTGGTTTTAGAAAAATGGCATTCCCATCTGGTAAAGTTGAGGGTTGTATGGTACAAGTAACTTTGTGGTACAACCTACACTTTAACGGTCTTTGGCTTTGATGACGTAGTTTTAC

TGTTCAAGACATGIGATCTGCACCTCTGAAGACATGCTTAAACCTAATTTATGAAGATTTACTCATTCTGTAAGTCTAATCATAATTTCTTTGGTACAGGCTGGTAAATGTTCA  
9910 9920 9930 9940 9950 9960 9970 9980 9990 10000 10010

Wild ORF1ab TGTTCAAGACATGIGATCTGCACCTCTGAAGACATGCTTAAACCTAATTTATGAAGATTTACTCATTCTGTAAGTCTAATCATAATTTCTTTGGTACAGGCTGGTAAATGTTCA  
Vac ORF1ab TGTTCAAGACATGIGATCTGCACCTCTGAAGACATGCTTAAACCTAATTTATGAAGATTTACTCATTCTGTAAGTCTAATCATAATTTCTTTGGTACAGGCTGGTAAATGTTCA

ACTCAGGGTTATTGGACATTCTATGCAAAAATTGTGTACTTAAGCTTAAGGTTGATACAGCCAATCCTAAGACACCTAAGTATAAGTTTGTTCGCATTCAACCAGGACAGA

10020 10030 10040 10050 10060 10070 10080 10090 10100 10110 10120

Wild ORF1ab ACTCAGGGTTATTGGACATTCTATGCAAAAATTGTGTACTTAAGCTTAAGGTTGATACAGCCAATCCTAAGACACCTAAGTATAAGTTTGTTCGCATTCAACCAGGACAGA  
Vac ORF1ab ACTCAGGGTTATTGGACATTCTATGCAAAAATTGTGTACTTAAGCTTAAGGTTGATACAGCCAATCCTAAGACACCTAAGTATAAGTTTGTTCGCATTCAACCAGGACAGA

CTTTTTCAGTGTAGCTTGTACAATGGTTCACCATCTGGTGTACCAATGTGCTATGAGGCCAATTTCACTATTAAGGGTTCATTCCTTAATGGTTCATGTGGTAGT

10130 10140 10150 10160 10170 10180 10190 10200 10210 10220 10230

Wild ORF1ab CTTTTTCAGTGTAGCTTGTACAATGGTTCACCATCTGGTGTACCAATGTGCTATGAGGCCAATTTCACTATTAAGGGTTCATTCCTTAATGGTTCATGTGGTAGT  
Vac ORF1ab CTTTTTCAGTGTAGCTTGTACAATGGTTCACCATCTGGTGTACCAATGTGCTATGAGGCCAATTTCACTATTAAGGGTTCATTCCTTAATGGTTCATGTGGTAGT

GTGGTTTTTAACATAGATTATGACTGTGTCTCTTTTTGTACATGCACCATATGGAATTACCAACTGGAGTTCATGCTGGCACAGACTTAGAAGGTAACTTTTATGGACC

10240 10250 10260 10270 10280 10290 10300 10310 10320 10330 10340

Wild ORF1ab GTGGTTTTTAACATAGATTATGACTGTGTCTCTTTTTGTACATGCACCATATGGAATTACCAACTGGAGTTCATGCTGGCACAGACTTAGAAGGTAACTTTTATGGACC  
Vac ORF1ab GTGGTTTTTAACATAGATTATGACTGTGTCTCTTTTTGTACATGCACCATATGGAATTACCAACTGGAGTTCATGCTGGCACAGACTTAGAAGGTAACTTTTATGGACC

TTTTGTTGACAGGCAAACAGCACAAAGCAGCTGGTACGGACACAACCTATTACAGTTAATGTTTTAGCTTGGTGTGACGCTGCTGTTATAAAATGGAGACAGGTGGTTTTCTCA

10350 10360 10370 10380 10390 10400 10410 10420 10430 10440 10450

Wild ORF1ab TTTTGTGACAGGCAAACAGCACAAAGCAGCTGGTACGGACACAACCTATTACAGTTAATGTTTTAGCTTGGTGTGACGCTGCTGTTATAAAATGGAGACAGGTGGTTTTCTCA  
Vac ORF1ab TTTTGTGACAGGCAAACAGCACAAAGCAGCTGGTACGGACACAACCTATTACAGTTAATGTTTTAGCTTGGTGTGACGCTGCTGTTATAAAATGGAGACAGGTGGTTTTCTCA

ATCGATTTACCACAACCTCTTAATGACTTTAACCCTTGTTGGCTATGAAGTACAATTTATGAACCTCTAACACAAGACCATGTTGACATACTAGGACCTCTTTCTGCTCAAACCT

10460 10470 10480 10490 10500 10510 10520 10530 10540 10550 10560

Wild ORF1ab ATCGATTTACCACAACCTCTTAATGACTTTAACCCTTGTTGGCTATGAAGTACAATTTATGAACCTCTAACACAAGACCATGTTGACATACTAGGACCTCTTTCTGCTCAAACCT  
Vac ORF1ab ATCGATTTACCACAACCTCTTAATGACTTTAACCCTTGTTGGCTATGAAGTACAATTTATGAACCTCTAACACAAGACCATGTTGACATACTAGGACCTCTTTCTGCTCAAACCT

GGAATTGCCGTTTTAGATATGTGTGCTTCATTTAAAAGAATTACTGCAAAAATGGTATGAATGGACGTACCATAATGGGTAGTGTCTTTATTTAGAAGATGAATTTACACCTTTT

10570 10580 10590 10600 10610 10620 10630 10640 10650 10660 10670

Wild ORF1ab GGAATTGCCGTTTTAGATATGTGTGCTTCATTTAAAAGAATTACTGCAAAAATGGTATGAATGGACGTACCATAATGGGTAGTGTCTTTATTTAGAAGATGAATTTACACCTTTT  
Vac ORF1ab GGAATTGCCGTTTTAGATATGTGTGCTTCATTTAAAAGAATTACTGCAAAAATGGTATGAATGGACGTACCATAATGGGTAGTGTCTTTATTTAGAAGATGAATTTACACCTTTT

TGATGTTGTTAGACAAATGCTCAGGTTTACTTTCCAAAGTGCAGTGAAGAACAATCAAGGGTACACACCACTGGTGTGTTACTCACAATTTTACTTCACTTTTACTTTT

10680 10690 10700 10710 10720 10730 10740 10750 10760 10770 10780

Wild ORF1ab TGATGTTGTTAGACAAATGCTCAGGTTTACTTTCCAAAGTGCAGTGAAGAACAATCAAGGGTACACACCACTGGTGTGTTACTCACAATTTTACTTCACTTTTACTTTT  
Vac ORF1ab TGATGTTGTTAGACAAATGCTCAGGTTTACTTTCCAAAGTGCAGTGAAGAACAATCAAGGGTACACACCACTGGTGTGTTACTCACAATTTTACTTCACTTTTACTTTT

TAGTCCAGAGTACTCAATGGTCTTTTGTTCTTTTTTTTTTATGAAAAATGCCTTTTTACCCTTTTGCTATGGGTATTATTGCTATGTCCTGCTTTTTGCAATGATGTTTGTCAAAA  
10790 10800 10810 10820 10830 10840 10850 10860 10870 10880 10890

Wild ORF1ab TAGTCCAGAGTACTCAATGGTCTTTTGTTCTTTTTTTTTTATGAAAAATGCCTTTTTACCCTTTTGCTATGGGTATTATTGCTATGTCCTGCTTTTTGCAATGATGTTTGTCAAAA  
Vac ORF1ab TAGTCCAGAGTACTCAATGGTCTTTTGTTCTTTTTTTTTTGTATGAAAAAGCCTTTTTACCCTTTTGCTATGGGGATTATTGCTATGTCCTGCTTTTTGCAATGATGTTTGTCAAAA

CATAAGCATGCATTTCTCTGTTTGTTTTGTTTACCTTCTCTTGCCACTGTAGCTTATTTTAAATATGGTCTATATGCCCTGCTAGTTGGGIGATGCGTATTATGACATGGTT  
10900 10910 10920 10930 10940 10950 10960 10970 10980 10990 11000

Wild ORF1ab CATAAGCATGCATTTCTCTGTTTGTTTTGTTTACCTTCTCTTGCCACTGTAGCTTATTTTAAATATGGTCTATATGCCCTGCTAGTTGGGIGATGCGTATTATGACATGGTT  
Vac ORF1ab CATAAGCATGCATTTCTCTGTTTGTTTTGTTTACCTTCTCTTGCCACTGTAGCTTATTTTAAATATGGTCTATATGCCCTGCTAGTTGGGIGATGCGTATTATGACATGGTT

GGATATGGTAATCACTAGTTTGTCTGGTTTTAAGCTAAAAGACTGTGTTTATGTATGCATCAGCTGTAGTGTACTAATCCTTATGACAGCAAGAAGCTGTGTATGATGATG  
11010 11020 11030 11040 11050 11060 11070 11080 11090 11100 11110

Wild ORF1ab GGATATGGTAATCACTAGTTTGTCTGGTTTTAAGCTAAAAGACTGTGTTTATGTATGCATCAGCTGTAGTGTACTAATCCTTATGACAGCAAGAAGCTGTGTATGATGATG  
Vac ORF1ab GGATATGGTAATCACTAGTTTGTCTGGTTTTAAGCTAAAAGACTGTGTTTATGTATGCATCAGCTGTAGTGTACTAATCCTTATGACAGCAAGAAGCTGTGTATGATGATG

GTGCTAGGAGAGTGTGGACACTTATGAATGCTTGACACTCGTTTTATAAAGTTTTATTATGGTAAATGCTTTAGATCAAGCCATTTCCATGTGGGCTCTTATAATCTCTGTT  
11120 11130 11140 11150 11160 11170 11180 11190 11200 11210 11220

Wild ORF1ab GTGCTAGGAGAGTGTGGACACTTATGAATGCTTGACACTCGTTTTATAAAGTTTTATTATGGTAAATGCTTTAGATCAAGCCATTTCCATGTGGGCTCTTATAATCTCTGTT  
Vac ORF1ab GTGCTAGGAGAGTGTGGACACTTATGAATGCTTGACACTCGTTTTATAAAGTTTTATTATGGTAAATGCTTTAGATCAAGCCATTTCCATGTGGGCTCTTATAATCTCTGTT

ACTTCTAACTACTCAGGIGTAGTTACAACCTGTCATGTTTTTGGCCAGAGGTATTGTTTTTATGIGIGTTGAGTATTGCCCTATTTTTCTTCATAACTGGTAATACACTTCA  
11230 11240 11250 11260 11270 11280 11290 11300 11310 11320 11330

Wild ORF1ab ACTTCTAACTACTCAGGIGTAGTTACAACCTGTCATGTTTTTGGCCAGAGGTATTGTTTTTATGIGIGTTGAGTATTGCCCTATTTTTCTTCATAACTGGTAATACACTTCA  
Vac ORF1ab ACTTCTAACTACTCAGGIGTAGTTACAACCTGTCATGTTTTTGGCCAGAGGTATTGTTTTTATGIGIGTTGAGTATTGCCCTATTTTTCTTCATAACTGGTAATACACTTCA

GGTATAATGCTAGTTTATTGTTCTTAGGCTATTTTTGTACTTGTACTTTGGCCCTCTTTGTTTACTCAACCGCTACTTTAGACTGACTCTTGGTGTATTATGATTACT  
11340 11350 11360 11370 11380 11390 11400 11410 11420 11430 11440

Wild ORF1ab GGTATAATGCTAGTTTATTGTTCTTAGGCTATTTTTGTACTTGTACTTTGGCCCTCTTTGTTTACTCAACCGCTACTTTAGACTGACTCTTGGTGTATTATGATTACT  
Vac ORF1ab GGTATAATGCTAGTTTATTGTTCTTAGGCTATTTTTGTACTTGTACTTTGGCCCTCTTTGTTTACTCAACCGCTACTTTAGACTGACTCTTGGTGTATTATGATTACT

TAGTTTCTACACAGGAGTTTAGATATAATGAATTCACAGGGACTACTCCCACCCAAGAATAGCATAGATGCCCTCAAACCTCAACATTTAAATTTGTTGGGIGTTGGTGGCAAAA  
11450 11460 11470 11480 11490 11500 11510 11520 11530 11540 11550

Wild ORF1ab TAGTTTCTACACAGGAGTTTAGATATAATGAATTCACAGGGACTACTCCCACCCAAGAATAGCATAGATGCCCTCAAACCTCAACATTTAAATTTGTTGGGIGTTGGTGGCAAAA  
Vac ORF1ab TAGTTTCTACACAGGAGTTTAGATATAATGAATTCACAGGGACTACTCCCACCCAAGAATAGCATAGATGCCCTCAAACCTCAACATTTAAATTTGTTGGGIGTTGGTGGCAAAA

CCTTGTATCAAAGTAGCCACTGTACAGTCTAAAAATGTCAGATGTAAAGTGCACATCAGTAGTCTTACTCTCAGTTTTGCAACAACCTCAGAGTAGAATCATCATCTAAATT  
11560 11570 11580 11590 11600 11610 11620 11630 11640 11650 11660

Wild ORF1ab CCTTGTATCAAAGTAGCCACTGTACAGTCTAAAAATGTCAGATGTAAAGTGCACATCAGTAGTCTTACTCTCAGTTTTGCAACAACCTCAGAGTAGAATCATCATCTAAATT  
Vac ORF1ab CCTTGTATCAAAGTAGCCACTGTACAGTCTAAAAATGTCAGATGTAAAGTGCACATCAGTAGTCTTACTCTCAGTTTTGCAACAACCTCAGAGTAGAATCATCATCTAAATT

GIGGGCTCAATGTGTCCAGTTACACAATGACATTCTCTTAGCTAAAGATACTACTGAAGCCTTTGAAAAATGGTTTCACTACTTTCTGTTTTGCTTTCCATGCAGGGTG  
11670 11680 11690 11700 11710 11720 11730 11740 11750 11760 11770

Wild ORF1ab GIGGGCTCAATGTGTCCAGTTACACAATGACATTCTCTTAGCTAAAGATACTACTGAAGCCTTTGAAAAATGGTTTCACTACTTTCTGTTTTGCTTTCCATGCAGGGTG  
Vac ORF1ab GIGGGCTCAATGTGTCCAGTTACACAATGACATTCTCTTAGCTAAAGATACTACTGAAGCCTTTGAAAAATGGTTTCACTACTTTCTGTTTTGCTTTCCATGCAGGGTG

CTGTAGCCATAAAACAAGCTTTGTGAAGAAATGCTGGACAACAGGGCAACCTTACAAGCTATAGCCTCAGAGTTTTAGTTCCCTTCCATCATATGCAGCTTTTGTACTTGCT  
11780 11790 11800 11810 11820 11830 11840 11850 11860 11870 11880

Wild ORF1ab CTGTAGCCATAAAACAAGCTTTGTGAAGAAATGCTGGACAACAGGGCAACCTTACAAGCTATAGCCTCAGAGTTTTAGTTCCCTTCCATCATATGCAGCTTTTGTACTTGCT  
Vac ORF1ab CTGTAGCCATAAAACAAGCTTTGTGAAGAAATGCTGGACAACAGGGCAACCTTACAAGCTATAGCCTCAGAGTTTTAGTTCCCTTCCATCATATGCAGCTTTTGTACTTGCT

CAAGAAGCTTATGAGCAGGCTGTGTGCTAATGGTGATTCGGAAGTTGTTCTTAAAAAGTTGAAGAAGTCTTTGAATGTGGCTAAATCTGAATTTGACCGTGATGCAGCCAT  
11890 11900 11910 11920 11930 11940 11950 11960 11970 11980 11990

Wild ORF1ab CAAGAAGCTTATGAGCAGGCTGTGTGCTAATGGTGATTCGGAAGTTGTTCTTAAAAAGTTGAAGAAGTCTTTGAATGTGGCTAAATCTGAATTTGACCGTGATGCAGCCAT  
Vac ORF1ab CAAGAAGCTTATGAGCAGGCTGTGTGCTAATGGTGATTCGGAAGTTGTTCTTAAAAAGTTGAAGAAGTCTTTGAATGTGGCTAAATCTGAATTTGACCGTGATGCAGCCAT

GCAACGTAAGTTGGAAAAGATGGCTGATCAAGCTATGACCCAAATGTATAAACAGGCTAGATCTGAGGACAAGAGGGGCAAAAAGTTACTAGTGTATGCAGACAATGCTTTT  
12000 12010 12020 12030 12040 12050 12060 12070 12080 12090 12100

Wild ORF1ab GCAACGTAAGTTGGAAAAGATGGCTGATCAAGCTATGACCCAAATGTATAAACAGGCTAGATCTGAGGACAAGAGGGGCAAAAAGTTACTAGTGTATGCAGACAATGCTTTT  
Vac ORF1ab GCAACGTAAGTTGGAAAAGATGGCTGATCAAGCTATGACCCAAATGTATAAACAGGCTAGATCTGAGGACAAGAGGGGCAAAAAGTTACTAGTGTATGCAGACAATGCTTTT

TCACTATGCTTAGAAAAGTTGGATAATGATGCACTCAACAACATTATCAACAATGCAAGAGATGGTTGTGTTCCCTTGAACATAATACCTCTTACAACAGCAGCCAAACTA  
12110 12120 12130 12140 12150 12160 12170 12180 12190 12200 12210

Wild ORF1ab TCACTATGCTTAGAAAAGTTGGATAATGATGCACTCAACAACATTATCAACAATGCAAGAGATGGTTGTGTTCCCTTGAACATAATACCTCTTACAACAGCAGCCAAACTA  
Vac ORF1ab TCACTATGCTTAGAAAAGTTGGATAATGATGCACTCAACAACATTATCAACAATGCAAGAGATGGTTGTGTTCCCTTGAACATAATACCTCTTACAACAGCAGCCAAACTA

ATGGTTGTCATACCAGACTATAACACATATAAAAAATACGTTGATGGTTACAACATTTACTTTATGCATCAGCATTTGTTGGGAAATCCAACAGGTTGTAGATGCAGATAGTAA  
12220 12230 12240 12250 12260 12270 12280 12290 12300 12310 12320

Wild ORF1ab ATGGTTGTCATACCAGACTATAACACATATAAAAAATACGTTGATGGTTACAACATTTACTTTATGCATCAGCATTTGTTGGGAAATCCAACAGGTTGTAGATGCAGATAGTAA  
Vac ORF1ab ATGGTTGTCATACCAGACTATAACACATATAAAAAATACGTTGATGGTTACAACATTTACTTTATGCATCAGCATTTGTTGGGAAATCCAACAGGTTGTAGATGCAGATAGTAA

AATTGTTCAACTTAGTGA AATTAGTATGGACAATTCACCTAATTTAGCATGGCCCTTATTGTAAACAGCTTTAAGGGCCAATTCGCTGTGCAAATTACAGAATAATGAGC  
12330 12340 12350 12360 12370 12380 12390 12400 12410 12420 12430

Wild ORF1ab AATTGTTCAACTTAGTGA AATTAGTATGGACAATTCACCTAATTTAGCATGGCCCTTATTGTAAACAGCTTTAAGGGCCAATTCGCTGTGCAAATTACAGAATAATGAGC  
Vac ORF1ab AATTGTTCAACTTAGTGA AATTAGTATGGACAATTCACCTAATTTAGCATGGCCCTTATTGTAAACAGCTTTAAGGGCCAATTCGCTGTGCAAATTACAGAATAATGAGC

TTAGTCCGTGTTGCACTACGACAGATGTCCTTGIGCTGCCGGTACTACACAACTGCTTGCCTGATGACAATGCGTTAGCTTACTACAACACAACAAGGGAGGTAGGTTT  
12440 12450 12460 12470 12480 12490 12500 12510 12520 12530 12540

Wild ORF1ab TTAGTCCGTGTTGCACTACGACAGATGTCCTTGIGCTGCCGGTACTACACAACTGCTTGCCTGATGACAATGCGTTAGCTTACTACAACACAACAAGGGAGGTAGGTTT  
Vac ORF1ab TTAGTCCGTGTTGCACTACGACAGATGTCCTTGIGCTGCCGGTACTACACAACTGCTTGCCTGATGACAATGCGTTAGCTTACTACAACACAACAAGGGAGGTAGGTTT

GTACTTGCCTGTTATCCGATTTACAGGATTTGAAATGGGCTAGATTCCCTAAGAGTIGATGGAACCTGGTACTATCTATACAGAACTGGAACCACCTTGTAGGTTTGTGTTAC  
12550 12560 12570 12580 12590 12600 12610 12620 12630 12640 12650

Wild ORF1ab GTACTTGCCTGTTATCCGATTTACAGGATTTGAAATGGGCTAGATTCCCTAAGAGTIGATGGAACCTGGTACTATCTATACAGAACTGGAACCACCTTGTAGGTTTGTGTTAC  
Vac ORF1ab GTACTTGCCTGTTATCCGATTTACAGGATTTGAAATGGGCTAGATTCCCTAAGAGTIGATGGAACCTGGTACTATCTATACAGAACTGGAACCACCTTGTAGGTTTGTGTTAC

AGACACACCTAAAGGTCCTAAAGTGAAGTATTTATACTTTATTAAAGGATTTAAACAACCTAAATAGAGGTATGGTACTTGGTAGTTTAGCTGCCACAGTACGTTCTACAAG  
12660 12670 12680 12690 12700 12710 12720 12730 12740 12750 12760

Wild ORF1ab AGACACACCTAAAGGTCCTAAAGTGAAGTATTTATACTTTATTAAAGGATTTAAACAACCTAAATAGAGGTATGGTACTTGGTAGTTTAGCTGCCACAGTACGTTCTACAAG  
Vac ORF1ab AGACACACCTAAAGGTCCTAAAGTGAAGTATTTATACTTTATTAAAGGATTTAAACAACCTAAATAGAGGTATGGTACTTGGTAGTTTAGCTGCCACAGTACGTTCTACAAG

CTGGTAAATGCAACAGAAGTGGCTGGCAATTCAACTGTATTATCTTTCTGIGCTTTTGTGCTAGATGCTGCTAAAGCTTACAAAGATTATCTAGCTAGTGGGGACAACCA  
12770 12780 12790 12800 12810 12820 12830 12840 12850 12860 12870

Wild ORF1ab CTGGTAAATGCAACAGAAGTGGCTGGCAATTCAACTGTATTATCTTTCTGIGCTTTTGTGCTAGATGCTGCTAAAGCTTACAAAGATTATCTAGCTAGTGGGGACAACCA  
Vac ORF1ab CTGGTAAATGCAACAGAAGTGGCTGGCAATTCAACTGTATTATCTTTCTGIGCTTTTGTGCTAGATGCTGCTAAAGCTTACAAAGATTATCTAGCTAGTGGGGACAACCA

ATCACTAATTGIGTTAAGATGTTGTGTACACACACTGGTACTGGTCAGGCAATAACAGTTACACCGGAAGCCAATATGGATCAAGAATCCTTTGGTGGTGCATCGTGTG  
12880 12890 12900 12910 12920 12930 12940 12950 12960 12970 12980

Wild ORF1ab ATCACTAATTGIGTTAAGATGTTGTGTACACACACTGGTACTGGTCAGGCAATAACAGTTACACCGGAAGCCAATATGGATCAAGAATCCTTTGGTGGTGCATCGTGTG  
Vac ORF1ab ATCACTAATTGIGTTAAGATGTTGTGTACACACACTGGTACTGGTCAGGCAATAACAGTTACACCGGAAGCCAATATGGATCAAGAATCCTTTGGTGGTGCATCGTGTG

TCGTACTGCCGTTGCCACATAGATCATCCAAATCCTAAAGGATTTTGTGACTTAAAAGGTAAGTATGTGCAAATACCTACAACCTTGTGCTAATGACCCCTGTGGGTTTTA  
12990 13000 13010 13020 13030 13040 13050 13060 13070 13080 13090

Wild ORF1ab TCGTACTGCCGTTGCCACATAGATCATCCAAATCCTAAAGGATTTTGTGACTTAAAAGGTAAGTATGTGCAAATACCTACAACCTTGTGCTAATGACCCCTGTGGGTTTTA  
Vac ORF1ab TCGTACTGCCGTTGCCACATAGATCATCCAAATCCTAAAGGATTTTGTGACTTAAAAGGTAAGTATGTGCAAATACCTACAACCTTGTGCTAATGACCCCTGTGGGTTTTA

CACTTAAAAACACAGTCTGTACCGTCTGCGGTATGTGGAAAGGTTATGGCTGTAGTTGTGATCAACTCCGCGAACCCATGCTTTCAGTCAGCTGATGCACAATCGTTTTTA  
13100 13110 13120 13130 13140 13150 13160 13170 13180 13190 13200

Wild ORF1ab CACTTAAAAACACAGTCTGTACC GTCTGCGGTATGTGGAAAGGTTATGGCTGTAGTTGTGATCAACTCCGCGAACCCATGCTTTCAGTCAGCTGATGCACAATCGTTTTTA  
Vac ORF1ab CACTTAAAAACACAGTCTGTACC GTCTGCGGTATGTGGAAAGGTTATGGCTGTAGTTGTGATCAACTCCGCGAACCCATGCTTTCAGTCAGCTGATGCACAATCGTTTTTA

AACCGGGTTTGCGGTGTAAAGTGCAGCCCGTCTTACACCGTGCGGCACAGGCACTAGTACTGATGTCGTATACAGGGCTTTTGACATCTACAATGATAAAGTAGCTGGTTT  
13210 13220 13230 13240 13250 13260 13270 13280 13290 13300 13310

Wild ORF1ab AACCGGGTTTGC GGTGTAAAGTGCAGCCCGTCTTACACCGTGC GGGCACAGGCACTAGTACTGATGTCGTATACAGGGCTTTTGACATCTACAATGATAAAGTAGCTGGTTT  
Vac ORF1ab AACCGGGTTTGC GGTGTAAAGTGCAGCCCGTCTTACACCGTGC GGGCACAGGCACTAGTACTGATGTCGTATACAGGGCTTTTGACATCTACAATGATAAAGTAGCTGGTTT

TGCTAAATTCCTAAAACTAATTTGTTGTCGCTTCCAAGAAAAGGACGAAGATGACAATTTAATTTGATTCTTACTTTTGTAGTTAAGAGACACACTTTTCTCTAACTACCAAC  
13320 13330 13340 13350 13360 13370 13380 13390 13400 13410 13420

Wild ORF1ab TGCTAAATTCCTAAAACTAATTTGTTGTCGCTTCCAAGAAAAGGACGAAGATGACAATTTAATTTGATTCTTACTTTTGTAGTTAAGAGACACACTTTTCTCTAACTACCAAC  
Vac ORF1ab TGCTAAATTCCTAAAACTAATTTGTTGTCGCTTCCAAGAAAAGGACGAAGATGACAATTTAATTTGATTCTTACTTTTGTAGTTAAGAGACACACTTTTCTCTAACTACCAAC

ATGAAGAAACAATTTATAATTTACTTAAGGATTGTCCAGCTGTGCTAAACATGACTTCTTTAAGTTTAGAATAGACGGTGACATGGTACCACATATATCACGTCAACGT  
13430 13440 13450 13460 13470 13480 13490 13500 13510 13520 13530

Wild ORF1ab ATGAAGAAACAATTTATAATTTACTTAAGGATTGTC CAGCTGTGCTAAACATGACTTCTTTAAGTTT AGAATAGACGGTGACATGGTACCACATATATCACGTCAACGT  
Vac ORF1ab ATGAAGAAACAATTTATAATTTACTTAAGGATTGTC CAGCTGTGCTAAACATGACTTCTTTAAGTTT AGAATAGACGGTGACATGGTACCACATATATCACGTCAACGT

CITACTAAATACACAATGGCAGACCTCGTCTATGCTTTAAGGCATTTTIGATGAAGGTAATTTGIGACACATTTAAAAGAAATACTTTGTCACATACAATTTGTTGIGATGATGA  
13540 13550 13560 13570 13580 13590 13600 13610 13620 13630 13640

Wild ORF1ab CITACTAAATACACAATGGCAGACCTCGTCTATGCTTTAAGGCATTTTIGATGAAGGTAATTTGIGACACATTTAAAAGAAATACTTTGTCACATACAATTTGTTGIGATGATGA  
Vac ORF1ab CITACTAAATACACAATGGCAGACCTCGTCTATGCTTTAAGGCATTTTIGATGAAGGTAATTTGIGACACATTTAAAAGAAATACTTTGTCACATACAATTTGTTGIGATGATGA

TTATTTCAATAAAAAAGGACTGGTATGATTTTGTAGAAAACCCAGATATATTACGCGTATACGCCAACTTAGGTGAACGTTGACGCCAAGCTTTGTTAAAAACAGTACAAT  
13650 13660 13670 13680 13690 13700 13710 13720 13730 13740 13750

Wild ORF1ab TTATTTCAATAAAAAAGGACTGGTATGATTTTGTAGAAAACCCAGATATATTACGCGTATACGCCAACTTAGGTGAACGTTGACGCCAAGCTTTGTTAAAAACAGTACAAT  
Vac ORF1ab TTATTTCAATAAAAAAGGACTGGTATGATTTTGTAGAAAACCCAGATATATTACGCGTATACGCCAACTTAGGTGAACGTTGACGCCAAGCTTTGTTAAAAACAGTACAAT

TCTGIGATGCCATGCGAAATGCTGGTATTTGTTGGTGTACTGACATTAGATAATCAAGATCTCAATGGTAACTGGTATGATTTCCGGTATTTCATACAAACCACGCCAGGT  
13760 13770 13780 13790 13800 13810 13820 13830 13840 13850 13860

Wild ORF1ab TCTGIGATGCCATGCGAAATGCTGGTATTTGTTGGTGTACTGACATTAGATAATCAAGATCTCAATGGTAACTGGTATGATTTCCGGTATTT CATACAAACCACGCCAGGT  
Vac ORF1ab TCTGIGATGCCATGCGAAATGCTGGTATTTGTTGGTGTACTGACATTAGATAATCAAGATCTCAATGGTAACTGGTATGATTTCCGGTATTT CATACAAACCACGCCAGGT



AGTGGAGTTCCTGTTGTAGATTCTTATTATTCATTGTTAATGCCATATAATTAACCTTGACCAGGGCTTTAACTGCAGAGTCACATGTTGACACTGACTTTAACAAAGCCTTA  
13870 13880 13890 13900 13910 13920 13930 13940 13950 13960 13970

Wild ORF1ab AGTGGAGTTCCTGTTGTAGATTCTTATTATTCATTGTTAATGCCATATAATTAACCTTGACCAGGGCTTTAACTGCAGAGTCACATGTTGACACTGACTTTAACAAAGCCTTA  
Vac ORF1ab AGTGGAGTTCCTGTTGTAGATTCTTATTATTCATTGTTAATGCCATATAATTAACCTTGACCAGGGCTTTAACTGCAGAGTCACATGTTGACACTGACTTTAACAAAGCCTTA

CATTAAGTGGGATTTGTTAAAATATGACTTCACGGAAGAGAGGTTAAAACCTTTGACCGTTATTTTAAATATTTGGGATCAGACATAACCACCCAAATTTGTTAACTGTT  
13980 13990 14000 14010 14020 14030 14040 14050 14060 14070 14080

Wild ORF1ab CATTAAGTGGGATTTGTTAAAATATGACTTCACGGAAGAGAGGTTAAAACCTTTGACCGTTATTTTAAATATTTGGGATCAGACATAACCACCCAAATTTGTTAACTGTT  
Vac ORF1ab CATTAAGTGGGATTTGTTAAAATATGACTTCACGGAAGAGAGGTTAAAACCTTTGACCGTTATTTTAAATATTTGGGATCAGACATAACCACCCAAATTTGTTAACTGTT

TGGATGACAGATGCATTCTGCATTGTGCAAACCTTTAATGTTTTATTCTCTACAGTGTCCACCTACAAGTTTTGGACCACTAGTGTAGAGAAAAATATTTGTTGATGGTGT  
14090 14100 14110 14120 14130 14140 14150 14160 14170 14180 14190

Wild ORF1ab TGGATGACAGATGCATTCTGCATTGTGCAAACCTTTAATGTTTTATTCTCTACAGTGTCCACCTACAAGTTTTGGACCACTAGTGTAGAGAAAAATATTTGTTGATGGTGT  
Vac ORF1ab TGGATGACAGATGCATTCTGCATTGTGCAAACCTTTAATGTTTTATTCTCTACAGTGTCCACCTACAAGTTTTGGACCACTAGTGTAGAGAAAAATATTTGTTGATGGTGT

CCATTTGTAGTTTCAACTGGATACCACTTCAGAGAGCTAGGTGTGTACATAATCAGGATGTAAACTTACATAGCTCTAGACTTAGTTTTAAGGAATTACTTTGTGTATGC  
14200 14210 14220 14230 14240 14250 14260 14270 14280 14290 14300

Wild ORF1ab CCATTTGTAGTTTCAACTGGATACCACTTCAGAGAGCTAGGTGTGTACATAATCAGGATGTAAACTTACATAGCTCTAGACTTAGTTTTAAGGAATTACTTTGTGTATGC  
Vac ORF1ab CCATTTGTAGTTTCAACTGGATACCACTTCAGAGAGCTAGGTGTGTACATAATCAGGATGTAAACTTACATAGCTCTAGACTTAGTTTTAAGGAATTACTTTGTGTATGC

TGCTGACCCGTCTATGCACGCTGCTTCGGTAAATCTATTACTAGATAAAACGCACTACGTGCTTTTCAGTAGCTGCCTTACTAACAATGTTGCTTTTTCAAACGTCAAAC  
14310 14320 14330 14340 14350 14360 14370 14380 14390 14400 14410

Wild ORF1ab TGCTGACCCGTCTATGCACGCTGCTTCGGTAAATCTATTACTAGATAAAACGCACTACGTGCTTTTCAGTAGCTGCCTTACTAACAATGTTGCTTTTTCAAACGTCAAAC  
Vac ORF1ab TGCTGACCCGTCTATGCACGCTGCTTCGGTAAATCTATTACTAGATAAAACGCACTACGTGCTTTTCAGTAGCTGCCTTACTAACAATGTTGCTTTTTCAAACGTCAAAC

CCGGTAGTTTTTAAACAAAGACTTCTATGACTTTGCTGTGTCTAAGGGTTTCCTTAAAGGAAGGAAGTTCGTGTGAATTTAAAACACTTCTTCTTTGCTCAGGATGGTAATGCT  
14420 14430 14440 14450 14460 14470 14480 14490 14500 14510 14520

Wild ORF1ab CCGGTAGTTTTTAAACAAAGACTTCTATGACTTTGCTGTGTCTAAGGGTTTCCTTAAAGGAAGGAAGTTCGTGTGAATTTAAAACACTTCTTCTTTGCTCAGGATGGTAATGCT  
Vac ORF1ab CCGGTAATTTTTAAACAAAGACTTCTATGACTTTGCTGTGTCTAAGGGTTTCCTTAAAGGAAGGAAGTTCGTGTGAATTTAAAACACTTCTTCTTTGCTCAGGATGGTAATGCT

GCTATCAGCGATTATGACTACTATCGTTATAAATCTACCAACAATGTTGATATCAGACAACCTACTATTTGTAGTTGAAGTTGTTGATAAGTACTTTGATTGTTACGATGG  
14530 14540 14550 14560 14570 14580 14590 14600 14610 14620 14630

Wild ORF1ab GCTATCAGCGATTATGACTACTATCGTTATAAATCTACCAACAATGTTGATATCAGACAACCTACTATTTGTAGTTGAAGTTGTTGATAAGTACTTTGATTGTTACGATGG  
Vac ORF1ab GCTATCAGCGATTATGACTACTATCGTTATAAATCTACCAACAATGTTGATATCAGACAACCTACTATTTGTAGTTGAAGTTGTTGATAAGTACTTTGATTGTTACGATGG

TGGCTGTATTAATGCTAACCAAGTCATCGTCAACAACCTAGACAAATCAGCTGGTTTTCCATTTAATAAATGGGGTAAGGCTAGACTTTTATTATGATTCAATGAGTTATG  
14640 14650 14660 14670 14680 14690 14700 14710 14720 14730 14740

Wild ORF1ab TGGCTGTATTAATGCTAACCAAGTCATCGTCAACAACCTAGACAAATCAGCTGGTTTTCCATTTAATAAATGGGGTAAGGCTAGACTTTTATTATGATTCAATGAGTTATG  
Vac ORF1ab TGGCTGTATTAATGCTAACCAAGTCATCGTCAACAACCTAGACAAATCAGCTGGTTTTCCATTTAATAAATGGGGTAAGGCTAGACTTTTATTATGATTCAATGAGTTATG

AGGATCAAGATGCACTTTTTCGCATATACAAAACGTAATGTCATCCCTACTATAACTCAAATGAATCTTAAGTATGCCATTAGTGCAAAGAATAGAGCTCGCACCGTAGCT  
14750 14760 14770 14780 14790 14800 14810 14820 14830 14840 14850

Wild ORF1ab AGGATCAAGATGCACTTTTTCGCATATACAAAACGTAATGTCATCCCTACTATAACTCAAATGAATCTTAAGTATGCCATTAGTGCAAAGAATAGAGCTCGCACCGTAGCT  
Vac ORF1ab AGGATCAAGATGCACTTTTTCGCATATACAAAACGTAATGTCATCCCTACTATAACTCAAATGAATCTTAAGTATGCCATTAGTGCAAAGAATAGAGCTCGCACCGTAGCT

GGTGTCTCTATCTGTAGTACTATGACCAATAGACAGTTTCATCAAAAAATTATTGAAATCAATAGCCGCCACTAGAGGAGCTACTGTAGTAATTGGAACAAGCAAATTTCTA  
14860 14870 14880 14890 14900 14910 14920 14930 14940 14950 14960

Wild ORF1ab GGTGTCTCTATCTGTAGTACTATGACCAATAGACAGTTTCATCAAAAAATTATTGAAATCAATAGCCGCCACTAGAGGAGCTACTGTAGTAATTGGAACAAGCAAATTTCTA  
Vac ORF1ab GGTGTCTCTATCTGTAGTACTATGACCAATAGACAGTTTCATCAAAAAATTATTGAAATCAATAGCCGCCACTAGAGGAGCTACTGTAGTAATTGGAACAAGCAAATTTCTA

TGGTGGTTGGCACAACATGTTAAAACTGTTTTATAGTGATGTAGAAAACCTCACCTTATGGGTGGGATPATCCTAAATGTGATAGAGCCATGCCAACATGCTTAGAA  
14970 14980 14990 15000 15010 15020 15030 15040 15050 15060 15070

Wild ORF1ab TGGTGGTTGGCACAACATGTTAAAACTGTTTTATAGTGATGTAGAAAACCTCACCTTATGGGTGGGATPATCCTAAATGTGATAGAGCCATGCCAACATGCTTAGAA  
Vac ORF1ab TGGTGGTTGGCACAACATGTTAAAACTGTTTTATAGTGATGTAGAAAACCTCACCTTATGGGTGGGATPATCCTAAATGTGATAGAGCCATGCCAACATGCTTAGAA

TTATGGCCTCACFTGFTCTGCTCGCAAACATAACAACGFTGFTGAGCTFTGTCACACCGFTTCTATAGATTAGCTAATGAGTGTGCTCAAGTATTGAGTGAATGGTCATG  
15080 15090 15100 15110 15120 15130 15140 15150 15160 15170 15180

Wild ORF1ab TTATGGCCTCACFTGFTCTGCTCGCAAACATAACAACGFTGFTGAGCTFTGTCACACCGFTTCTATAGATTAGCTAATGAGTGTGCTCAAGTATTGAGTGAATGGTCATG  
Vac ORF1ab TTATGGCCTCACFTGFTCTGCTCGCAAACATAACAACGFTGFTGAGCTFTGTCACACCGFTTCTATAGATTAGCTAATGAGTGTGCTCAAGTATTGAGTGAATGGTCATG

TGTGGCGGTTCACTATATGTTAAACCAGGTGGAACCTCATCAGGAGATGCCACAACCTGCTTATGCTAATAGTGTPTTTAACATTTGTCAAGCTGTCACGGCCAATGTTAA  
15190 15200 15210 15220 15230 15240 15250 15260 15270 15280 15290

Wild ORF1ab TGTGGCGGTTCACTATATGTTAAACCAGGTGGAACCTCATCAGGAGATGCCACAACCTGCTTATGCTAATAGTGTPTTTAACATTTGTCAAGCTGTCACGGCCAATGTTAA  
Vac ORF1ab TGTGGCGGTTCACTATATGTTAAACCAGGTGGAACCTCATCAGGAGATGCCACAACCTGCTTATGCTAATAGTGTPTTTAACATTTGTCAAGCTGTCACGGCCAATGTTAA

TGCACTTTTATCTACTGATGGTAAACAAAATTGCCGATAAGTATGTCGCAATTTACAACACAGACTTTATGAGTGTCTCTATAGAAATAGAGATGTTGACACAGACTTTG  
15300 15310 15320 15330 15340 15350 15360 15370 15380 15390 15400

Wild ORF1ab TGCACTTTTATCTACTGATGGTAAACAAAATTGCCGATAAGTATGTCGCAATTTACAACACAGACTTTATGAGTGTCTCTATAGAAATAGAGATGTTGACACAGACTTTG  
Vac ORF1ab TGCACTTTTATCTACTGATGGTAAACAAAATTGCCGATAAGTATGTCGCAATTTACAACACAGACTTTATGAGTGTCTCTATAGAAATAGAGATGTTGACACAGACTTTG

TGAATGAGTTTTACGCATATTTGCGTAAACATTTCTCAATGATGATACTCTCTGACGATGCTGTGTGTGTGTTTCAATAGCACTTATGCATCTCAAGGICTAGTGGCTAGC  
15410 15420 15430 15440 15450 15460 15470 15480 15490 15500 15510

Wild ORF1ab TGAATGAGTTTTACGCATATTTGCGTAAACATTTCTCAATGATGATACTCTCTGACGATGCTGTGTGTGTGTTTCAATAGCACTTATGCATCTCAAGGICTAGTGGCTAGC  
Vac ORF1ab TGAATGAGTTTTACGCATATTTGCGTAAACATTTCTCAATGATGATACTCTCTGACGATGCTGTGTGTGTGTTTCAATAGCACTTATGCATCTCAAGGICTAGTGGCTAGC

ATAAAGAACTTTAAGTCAGTTCCTTTATTATCAAACAATGTTTTTATGTCCTGAAGCAAAATGTTGGACTGAGACTGACCTTACTAAAGGACCTCATGAATTTTGCTCTCA  
15520 15530 15540 15550 15560 15570 15580 15590 15600 15610 15620

Wild ORF1ab ATAAAGAACTTTAAGTCAGTTCCTTTATTATCAAACAATGTTTTTATGTCCTGAAGCAAAATGTTGGACTGAGACTGACCTTACTAAAGGACCTCATGAATTTTGCTCTCA  
Vac ORF1ab ATAAAGAACTTTAAGTCAGTTCCTTTATTATCAAACAATGTTTTTATGTCCTGAAGCAAAATGTTGGACTGAGACTGACCTTACTAAAGGACCTCATGAATTTTGCTCTCA

ACATACAATGCTAGTTAAACAGGGTGATGATTATGTTGTTACCTTCCCTTACCCAGATCCATCAAGAATCCTAGGGGCCGGCTGTTTTGTAGATGATATCGTAAAAACAGATG  
15630 15640 15650 15660 15670 15680 15690 15700 15710 15720 15730

Wild ORF1ab ACATACAATGCTAGTTAAACAGGGTGATGATTATGTTGTTACCTTCCCTTACCCAGATCCATCAAGAATCCTAGGGGCCGGCTGTTTTGTAGATGATATCGTAAAAACAGATG  
Vac ORF1ab ACATACAATGCTAGTTAAACAGGGTGATGATTATGTTGTTACCTTCCCTTACCCAGATCCATCAAGAATCCTAGGGGCCGGCTGTTTTGTAGATGATATCGTAAAAACAGATG

GTACACTTATGATTGAACGGTTCGTGTCCTTTAGCTATAGATGCTTACCCACTTACTAAACATCCTAATCAGGAGTATGCTGATGTCCTTCATTTGTACTTACAATACATA  
15740 15750 15760 15770 15780 15790 15800 15810 15820 15830 15840

Wild ORF1ab GTACACTTATGATTGAACGGTTCGTGTCCTTTAGCTATAGATGCTTACCCACTTACTAAACATCCTAATCAGGAGTATGCTGATGTCCTTCATTTGTACTTACAATACATA  
Vac ORF1ab GTACACTTATGATTGAACGGTTCGTGTCCTTTAGCTATAGATGCTTACCCACTTACTAAACATCCTAATCAGGAGTATGCTGATGTCCTTCATTTGTACTTACAATACATA

AGAAAGCTACATGATGAGTTAACAGGACACATGTTAGACATGTTATTCGTATGCTTACTAATGATAACACTTCAAGGTATTGGGAACCTGAGTTTTATGAGGCTATGTA  
15850 15860 15870 15880 15890 15900 15910 15920 15930 15940 15950

Wild ORF1ab AGAAAGCTACATGATGAGTTAACAGGACACATGTTAGACATGTTATTCGTATGCTTACTAATGATAACACTTCAAGGTATTGGGAACCTGAGTTTTATGAGGCTATGTA  
Vac ORF1ab AGAAAGCTACATGATGAGTTAACAGGACACATGTTAGACATGTTATTCGTATGCTTACTAATGATAACACTTCAAGGTATTGGGAACCTGAGTTTTATGAGGCTATGTA

CACACCGCATACAGTCTTACAGGCTGTGGGGCTTGTGTTCTTTGCAATTCACAGACTTCATTAAGATGTGGTGCTTGCATACGTAGACCATTCCTATGTTGTAAATGCT  
15960 15970 15980 15990 16000 16010 16020 16030 16040 16050 16060

Wild ORF1ab CACACCGCATACAGTCTTACAGGCTGTGGGGCTTGTGTTCTTTGCAATTCACAGACTTCATTAAGATGTGGTGCTTGCATACGTAGACCATTCCTATGTTGTAAATGCT  
Vac ORF1ab CACACCGCATACAGTCTTACAGGCTGTGGGGCTTGTGTTCTTTGCAATTCACAGACTTCATTAAGATGTGGTGCTTGCATACGTAGACCATTCCTATGTTGTAAATGCT

GTTACGACCATGTCATATCAACATCACATAAAATTAGTCTTGTCTGTTAATCCGTATGTTTGCATGCTCCAGGTTGTGATGTCACAGATGTGACTCAACTTTACTTAGGA  
16070 16080 16090 16100 16110 16120 16130 16140 16150 16160 16170

Wild ORF1ab GTTACGACCATGTCATATCAACATCACATAAAATTAGTCTTGTCTGTTAATCCGTATGTTTGCATGCTCCAGGTTGTGATGTCACAGATGTGACTCAACTTTACTTAGGA  
Vac ORF1ab GTTACGACCATGTCATATCAACATCACATAAAATTAGTCTTGTCTGTTAATCCGTATGTTTGCATGCTCCAGGTTGTGATGTCACAGATGTGACTCAACTTTACTTAGGA

GGTATGAGCTATTATTGTAAATCACATAAACCACCCATTAGTTTTCCATTGTGTGCTAATGGACAAGTTTTTGGTTTTATATAAAAAATACATGTGTGGTAGCGATAATGT  
16180 16190 16200 16210 16220 16230 16240 16250 16260 16270 16280  
Wild ORF1ab GGTATGAGCTATTATTGTAAATCACATAAACCACCCATTAGTTTTCCATTGTGTGCTAATGGACAAGTTTTTGGTTTTATATAAAAAATACATGTGTGGTAGCGATAATGT  
Vac ORF1ab GGTATGAGCTATTATTGTAAATCACATAAACCACCCATTAGTTTTCCATTGTGTGCTAATGGACAAGTTTTTGGTTTTATATAAAAAATACATGTGTGGTAGCGATAATGT

TACTGACTTTAATGCAATTGCAACATGTGACTGGACAAATGCTGGTGAATTACATTTTAGCTAACACCTGTACTGAAAGACTCAAGCTTTTTGCAGCAGAAACGCTCAAAG  
16290 16300 16310 16320 16330 16340 16350 16360 16370 16380 16390  
Wild ORF1ab TACTGACTTTAATGCAATTGCAACATGTGACTGGACAAATGCTGGTGAATTACATTTTAGCTAACACCTGTACTGAAAGACTCAAGCTTTTTGCAGCAGAAACGCTCAAAG  
Vac ORF1ab TACTGACTTTAATGCAATTGCAACATGTGACTGGACAAATGCTGGTGAATTACATTTTAGCTAACACCTGTACTGAAAGACTCAAGCTTTTTGCAGCAGAAACGCTCAAAG

CTACTGAGGAGACATTTAAACTGTCTTATGGTATTGCTACTGTACGFIGAAGTGTCTGTGACAGAGAATTACATCTTTTCATGGGAAGTTGGTAAACCTAGACCACCCTT  
16400 16410 16420 16430 16440 16450 16460 16470 16480 16490 16500  
Wild ORF1ab CTACTGAGGAGACATTTAAACTGTCTTATGGTATTGCTACTGTACGFIGAAGTGTCTGTGACAGAGAATTACATCTTTTCATGGGAAGTTGGTAAACCTAGACCACCCTT  
Vac ORF1ab CTACTGAGGAGACATTTAAACTGTCTTATGGTATTGCTACTGTACGFIGAAGTGTCTGTGACAGAGAATTACATCTTTTCATGGGAAGTTGGTAAACCTAGACCACCCTT

AACCGAAAATTATGTCTTTACTGGTTATCGTGTAACTAAAAACAGTAAAGTACAAATAGGAGAGTACACCTTTGAAAAAGGTGACTATGGTATGCTGTGTGTTACCGAGG  
16510 16520 16530 16540 16550 16560 16570 16580 16590 16600 16610  
Wild ORF1ab AACCGAAAATTATGTCTTTACTGGTTATCGTGTAACTAAAAACAGTAAAGTACAAATAGGAGAGTACACCTTTGAAAAAGGTGACTATGGTATGCTGTGTGTTACCGAGG  
Vac ORF1ab AACCGAAAATTATGTCTTTACTGGTTATCGTGTAACTAAAAACAGTAAAGTACAAATAGGAGAGTACACCTTTGAAAAAGGTGACTATGGTATGCTGTGTGTTACCGAGG

TACAACAACITACAAATTAATGTTGGTGAATTATTTTGTGCTGACATCACATACAGTAAATGCCATTAAGTGCACCTACACTAGTCCACAAGAGCACTATGTTAGAATTA  
16620 16630 16640 16650 16660 16670 16680 16690 16700 16710 16720  
Wild ORF1ab TACAACAACITACAAATTAATGTTGGTGAATTATTTTGTGCTGACATCACATACAGTAAATGCCATTAAGTGCACCTACACTAGTCCACAAGAGCACTATGTTAGAATTA  
Vac ORF1ab TACAACAACITACAAATTAATGTTGGTGAATTATTTTGTGCTGACATCACATACAGTAAATGCCATTAAGTGCACCTACACTAGTCCACAAGAGCACTATGTTAGAATTA

CTGGCTTATACCCAACACTCAATATCTCAGATGAGTTTTCTAGCAATGTTGCAAATTTATCAAAAAGGTTGGTATGCAAAAAGTATTTCTACATTCAGGGACCACCTGGTACT  
16730 16740 16750 16760 16770 16780 16790 16800 16810 16820 16830  
Wild ORF1ab CTGGCTTATACCCAACACTCAATATCTCAGATGAGTTTTCTAGCAATGTTGCAAATTTATCAAAAAGGTTGGTATGCAAAAAGTATTTCTACATTCAGGGACCACCTGGTACT  
Vac ORF1ab CTGGCTTATACCCAACACTCAATATCTCAGATGAGTTTTCTAGCAATGTTGCAAATTTATCAAAAAGGTTGGTATGCAAAAAGTATTTCTACATTCAGGGACCACCTGGTACT

GGTAAAGAGTCATTTTGTATTTGGCTTAGCTCTCTACTACCTTCTGCTCGCATAGTGTATACAGCTTGTCTCTCATGCCGCTGTGTGATGCACTATGTGAGAAGGCATTTAAA  
16840 16850 16860 16870 16880 16890 16900 16910 16920 16930 16940  
Wild ORF1ab GGTAAAGAGTCATTTTGTATTTGGCTTAGCTCTCTACTACCTTCTGCTCGCATAGTGTATACAGCTTGTCTCTCATGCCGCTGTGTGATGCACTATGTGAGAAGGCATTTAAA  
Vac ORF1ab GGTAAAGAGTCATTTTGTATTTGGCTTAGCTCTCTACTACCTTCTGCTCGCATAGTGTATACAGCTTGTCTCTCATGCCGCTGTGTGATGCACTATGTGAGAAGGCATTTAAA

ATATTTGCCCTATAGATAAAATGTAGTAGAATTATACCTGCACGTGCTCGTGTAGAGTGTFTTTGATAAAATTCAAAGTGAATTC AACATTAGAACAGTATGTCITTTTGTACTG  
16950 16960 16970 16980 16990 17000 17010 17020 17030 17040 17050

Wild ORF1ab ATATTTGCCCTATAGATAAAATGTAGTAGAATTATACCTGCACGTGCTCGTGTAGAGTGTFTTTGATAAAATTCAAAGTGAATTC AACATTAGAACAGTATGTCITTTTGTACTG  
Vac ORF1ab ATATTTGCCCTATAGATAAAATGTAGTAGAATTATACCTGCACGTGCTCGTGTAGAGTGTFTTTGATAAAATTCAAAGTGAATTC AACATTAGAACAGTATGTCITTTTGTACTG

TAAATGCATTGCCCTGAGACGACAGCAGATATAGTTGTCITTTGATGAAATTC AATGGCCACAAATTTATGATTTGAGTGTGTGCAATGCCAGATTACGTGCTAAGCACTAT  
17060 17070 17080 17090 17100 17110 17120 17130 17140 17150 17160

Wild ORF1ab TAAATGCATTGCCCTGAGACGACAGCAGATATAGTTGTCITTTGATGAAATTC AATGGCCACAAATTTATGATTTGAGTGTGTGCAATGCCAGATTACGTGCTAAGCACTAT  
Vac ORF1ab TAAATGCATTGCCCTGAGACGACAGCAGATATAGTTGTCITTTGATGAAATTC AATGGCCACAAATTTATGATTTGAGTGTGTGCAATGCCAGATTACGTGCTAAGCACTAT

GTGTACATTTGGCGACCCCTGCTCAATTACCTGCACCACGCACATTGCTAACTAAGGGCACACTAGAAC CAGAATATTTCAATTCAGTGTGTAGACTTTATGAAA ACTATAGG  
17170 17180 17190 17200 17210 17220 17230 17240 17250 17260 17270

Wild ORF1ab GTGTACATTTGGCGACCCCTGCTCAATTACCTGCACCACGCACATTGCTAACTAAGGGCACACTAGAAC CAGAATATTTCAATTCAGTGTGTAGACTTTATGAAA ACTATAGG  
Vac ORF1ab GTGTACATTTGGCGACCCCTGCTCAATTACCTGCACCACGCACATTGCTAACTAAGGGCACACTAGAAC CAGAATATTTCAATTCAGTGTGTAGACTTTATGAAA ACTATAGG

TCCAGACATGTTCCCTCGGAACCTTGTCCGGCGTTGTCTGCTGAAATTTGTTGACACTGTGAGTGTCTTTGGT TTTATGATAATAAGCTTTAAAGCACATAAAGACAAATCAGCTC  
17280 17290 17300 17310 17320 17330 17340 17350 17360 17370 17380

Wild ORF1ab TCCAGACATGTTCCCTCGGAACCTTGTCCGGCGTTGTCTGCTGAAATTTGTTGACACTGTGAGTGTCTTTGGT TTTATGATAATAAGCTTTAAAGCACATAAAGACAAATCAGCTC  
Vac ORF1ab TCCAGACATGTTCCCTCGGAACCTTGTCCGGCGTTGTCTGCTGAAATTTGTTGACACTGTGAGTGTCTTTGGT TTTATGATAATAAGCTTTAAAGCACATAAAGACAAATCAGCTC

AATGCTTTAAAAATGTTTTATAAGGGTGTATACGCATGATGTTTCATCTGCAATTAACAGGCCACAAATAGGCGTGGT AAGAGAATTCCTTTACACGTAACCCCTGCTTTGG  
17390 17400 17410 17420 17430 17440 17450 17460 17470 17480 17490

Wild ORF1ab AATGCTTTAAAAATGTTTTATAAGGGTGTATACGCATGATGTTTCATCTGCAATTAACAGGCCACAAATAGGCGTGGT AAGAGAATTCCTTTACACGTAACCCCTGCTTTGG  
Vac ORF1ab AATGCTTTAAAAATGTTTTATAAGGGTGTATACGCATGATGTTTCATCTGCAATTAACAGGCCACAAATAGGCGTGGT AAGAGAATTCCTTTACACGTAACCCCTGCTTTGG

AGAAAAGCTGTCTTTTATTTACCTTATAATTCACAGAATGCTGTAGCCTCAAAGGTTTTGGGACTACCAACTCAAAC TGTGTGATTCATCACAGGGCTCAGAATATGACTA  
17500 17510 17520 17530 17540 17550 17560 17570 17580 17590 17600

Wild ORF1ab AGAAAAGCTGTCTTTTATTTACCTTATAATTCACAGAATGCTGTAGCCTCAAAGGTTTTGGGACTACCAACTCAAAC TGTGTGATTCATCACAGGGCTCAGAATATGACTA  
Vac ORF1ab AGAAAAGCTGTCTTTTATTTACCTTATAATTCACAGAATGCTGTAGCCTCAAAGGTTTTGGGACTACCAACTCAAAC TGTGTGATTCATCACAGGGCTCAGAATATGACTA

TGTCATATTCACTCAAACCCTGAAACAGCTCACTCTTGTAAATGTTAAACAGATTTAATGTTGCTATTACCAGAGCAA AAGTAGGCATACTTTGCATAATGTCGTATAGAG  
17610 17620 17630 17640 17650 17660 17670 17680 17690 17700 17710

Wild ORF1ab TGTCATATTCACTCAAACCCTGAAACAGCTCACTCTTGTAAATGTTAAACAGATTTAATGTTGCTATTACCAGAGCAA AAGTAGGCATACTTTGCATAATGTCGTATAGAG  
Vac ORF1ab TGTCATATTCACTCAAACCCTGAAACAGCTCACTCTTGTAAATGTTAAACAGATTTAATGTTGCTATTACCAGAGCAA AAGTAGGCATACTTTGCATAATGTCGTATAGAG

ACCTTTTATGACAAGTTGCAATTTTACAAGTCTTTGAAATTCACGTTAGGAATGTGGCAACTTTTACAAGCTGAAAATGTAACAGGACTCTTTTAAAGATTGTAGTAAGGTAATC  
17720 17730 17740 17750 17760 17770 17780 17790 17800 17810 17820

Wild ORF1ab ACCTTTTATGACAAGTTGCAATTTTACAAGTCTTTGAAATTCACGTTAGGAATGTGGCAACTTTTACAAGCTGAAAATGTAACAGGACTCTTTTAAAGATTGTAGTAAGGTAATC  
Vac ORF1ab ACCTTTTATGACAAGTTGCAATTTTACAAGTCTTTGAAATTCACGTTAGGAATGTGGCAACTTTTACAAGCTGAAAATGTAACAGGACTCTTTTAAAGATTGTAGTAAGGTAATC

ACTGGGTTACATCCTACACAGGCACCTACACACCTCAGTGTGTGACACTAAATTCAAAACCTGAAGGTTTATGTGTGTGACATACCTGGCATACTAAGGACATGACCTATAG  
17830 17840 17850 17860 17870 17880 17890 17900 17910 17920 17930

Wild ORF1ab ACTGGGTTACATCCTACACAGGCACCTACACACCTCAGTGTGTGACACTAAATTCAAAACCTGAAGGTTTATGTGTGTGACATACCTGGCATACTAAGGACATGACCTATAG  
Vac ORF1ab ACTGGGTTACATCCTACACAGGCACCTACACACCTCAGTGTGTGACACTAAATTCAAAACCTGAAGGTTTATGTGTGTGACATACCTGGCATACTAAGGACATGACCTATAG

AAGACTCATCTCTATGATGGGTTTTAAAAATGAATTATCAAGTTAATGGTTACCTAACATGTTTTATCACCCGCGAAGAAGCTATAAGACATGTACGTGCATGGATTGGCT  
17940 17950 17960 17970 17980 17990 18000 18010 18020 18030 18040

Wild ORF1ab AAGACTCATCTCTATGATGGGTTTTAAAAATGAATTATCAAGTTAATGGTTACCTAACATGTTTTATCACCCGCGAAGAAGCTATAAGACATGTACGTGCATGGATTGGCT  
Vac ORF1ab AAGACTCATCTCTATGATGGGTTTTAAAAATGAATTATCAAGTTAATGGTTACCTAACATGTTTTATCACCCGCGAAGAAGCTATAAGACATGTACGTGCATGGATTGGCT

TCGATGTCGAGGGGTGTCATGCTACTAGAGAAGCTGTTGGTACCAATTTACCTTTACAGCTAGGTTTTCTACAGGTGTTAACCTAGTTGCTGTACCTACAGGTTATGTT  
18050 18060 18070 18080 18090 18100 18110 18120 18130 18140 18150

Wild ORF1ab TCGATGTCGAGGGGTGTCATGCTACTAGAGAAGCTGTTGGTACCAATTTACCTTTACAGCTAGGTTTTCTACAGGTGTTAACCTAGTTGCTGTACCTACAGGTTATGTT  
Vac ORF1ab TCGATGTCGAGGGGTGTCATGCTACTAGAGAAGCTGTTGGTACCAATTTACCTTTACAGCTAGGTTTTCTACAGGTGTTAACCTAGTTGCTGTACCTACAGGTTATGTT

GATACACCTAATAAATACAGATTTTTCCAGAGTTAGTGTCTAAACCACCGCTGGAGATCAATTTAAACACCTCATAACCATTATGTACAAAGGACTTCTTTGGAATGTAGT  
18160 18170 18180 18190 18200 18210 18220 18230 18240 18250 18260

Wild ORF1ab GATACACCTAATAAATACAGATTTTTCCAGAGTTAGTGTCTAAACCACCGCTGGAGATCAATTTAAACACCTCATAACCATTATGTACAAAGGACTTCTTTGGAATGTAGT  
Vac ORF1ab GATACACCTAATAAATACAGATTTTTCCAGAGTTAGTGTCTAAACCACCGCTGGAGATCAATTTAAACACCTCATAACCATTATGTACAAAGGACTTCTTTGGAATGTAGT

GCGTATAAAGATTGTACAAATGTTAAGTGACACACTTAAAAATCTCTCTGACAGAGTCGTATTTGTCTTATGGGCACATGGCTTTGAGTTGACATCTATGAAGTATTTTG  
18270 18280 18290 18300 18310 18320 18330 18340 18350 18360 18370

Wild ORF1ab GCGTATAAAGATTGTACAAATGTTAAGTGACACACTTAAAAATCTCTCTGACAGAGTCGTATTTGTCTTATGGGCACATGGCTTTGAGTTGACATCTATGAAGTATTTTG  
Vac ORF1ab GCGTATAAAGATTGTACAAATGTTAAGTGACACACTTAAAAATCTCTCTGACAGAGTCGTATTTGTCTTATGGGCACATGGCTTTGAGTTGACATCTATGAAGTATTTTG

TGAAAATAGGACCTGAGCGCACCTGTTTGTCTATGTGATAGACGTGCCACATGCTTTTCCACTGCTTCAGACACTTATGCCCTGTTGGCATCATTCTATTGGATTTGATTAC  
18380 18390 18400 18410 18420 18430 18440 18450 18460 18470 18480

Wild ORF1ab TGAAAATAGGACCTGAGCGCACCTGTTTGTCTATGTGATAGACGTGCCACATGCTTTTCCACTGCTTCAGACACTTATGCCCTGTTGGCATCATTCTATTGGATTTGATTAC  
Vac ORF1ab TGAAAATAGGACCTGAGCGCACCTGTTTGTCTATGTGATAGACGTGCCACATGCTTTTCCACTGCTTCAGACACTTATGCCCTGTTGGCATCATTCTATTGGATTTGATTAC

GTCTATAATCCGTTTATGATTGATGTTCAACAATGGGGTTTTACAGGTAACCTACAAAGCAACCATGATCTGTATTGTCAAGTCCATGGTAATGCACATGTAGCTAGTTG  
18490 18500 18510 18520 18530 18540 18550 18560 18570 18580 18590

Wild ORF1ab GTCTATAATCCGTTTATGATTGATGTTCAACAATGGGGTTTTACAGGTAACCTACAAAGCAACCATGATCTGTATTGTCAAGTCCATGGTAATGCACATGTAGCTAGTTG  
Vac ORF1ab GTCTATAATCCGTTTATGATTGATGTTCAACAATGGGGTTTTACAGGTAACCTACAAAGCAACCATGATCTGTATTGTCAAGTCCATGGTAATGCACATGTAGCTAGTTG

TGATGCAATCATGACTAGGGTGCTAGCTGTCCACGAGTGCCTTTGTTAAGCGTGTGACTGGACTATTGAATATCCTATAAATGGTGATGAACTGAAGATTAATGCGGCTT  
18600 18610 18620 18630 18640 18650 18660 18670 18680 18690 18700

Wild ORF1ab TGATGCAATCATGACTAGGGTGCTAGCTGTCCACGAGTGCCTTTGTTAAGCGTGTGACTGGACTATTGAATATCCTATAAATGGTGATGAACTGAAGATTAATGCGGCTT  
Vac ORF1ab TGATGCAATCATGACTAGGGTGCTAGCTGTCCACGAGTGCCTTTGTTAAGCGTGTGACTGGACTATTGAATATCCTATAAATGGTGATGAACTGAAGATTAATGCGGCTT

GTAGAAAGGTTCAACACATGGTTGTTAAAGCTGCATTATTAGCAGACAAAATCCAGTTCCTTCACGACATTGGTAACCCTAAAGCTATTAAGTGTGTACCTCAAGCTGAT  
18710 18720 18730 18740 18750 18760 18770 18780 18790 18800 18810

Wild ORF1ab GTAGAAAGGTTCAACACATGGTTGTTAAAGCTGCATTATTAGCAGACAAAATCCAGTTCCTTCACGACATTGGTAACCCTAAAGCTATTAAGTGTGTACCTCAAGCTGAT  
Vac ORF1ab GTAGAAAGGTTCAACACATGGTTGTTAAAGCTGCATTATTAGCAGACAAAATCCAGTTCCTTCACGACATTGGTAACCCTAAAGCTATTAAGTGTGTACCTCAAGCTGAT

GTAGAATGGAAGTTCATGATGCACAGCCTTGTAGTGACAAAGCTTATAAAAATAGAAGAATTATTCATTCCTTATGCCACACATTCGACAAATTCACAGATGGTGTATG  
18820 18830 18840 18850 18860 18870 18880 18890 18900 18910 18920

Wild ORF1ab GTAGAATGGAAGTTCATGATGCACAGCCTTGTAGTGACAAAGCTTATAAAAATAGAAGAATTATTCATTCCTTATGCCACACATTCGACAAATTCACAGATGGTGTATG  
Vac ORF1ab GTAGAATGGAAGTTCATGATGCACAGCCTTGTAGTGACAAAGCTTATAAAAATAGAAGAATTATTCATTCCTTATGCCACACATTCGACAAATTCACAGATGGTGTATG

CCTATTTTGGAAATGCAATGTCGATAGATATCCTGCTAATTCATTGTTTGTAGATTTGACACTAGAGTGTCTATCTAACCTTAACTTGCCTTGGTTGTGATGGTGGCAGTT  
18930 18940 18950 18960 18970 18980 18990 19000 19010 19020 19030

Wild ORF1ab CCTATTTTGGAAATGCAATGTCGATAGATATCCTGCTAATTCATTGTTTGTAGATTTGACACTAGAGTGTCTATCTAACCTTAACTTGCCTTGGTTGTGATGGTGGCAGTT  
Vac ORF1ab CCTATTTTGGAAATGCAATGTCGATAGATATCCTGCTAATTCATTGTTTGTAGATTTGACACTAGAGTGTCTATCTAACCTTAACTTGCCTTGGTTGTGATGGTGGCAGTT

TGTATGTAATAAACATGCATTCCACACACCAGCTTTTGATAAAAAGTGCCTTTTGTAAATTTAAAACAATTACCATTTTTCTATTACTCTGACAGTCCATGTGAGTCTCAT  
19040 19050 19060 19070 19080 19090 19100 19110 19120 19130 19140

Wild ORF1ab TGTATGTAATAAACATGCATTCCACACACCAGCTTTTGATAAAAAGTGCCTTTTGTAAATTTAAAACAATTACCATTTTTCTATTACTCTGACAGTCCATGTGAGTCTCAT  
Vac ORF1ab TGTATGTAATAAACATGCATTCCACACACCAGCTTTTGATAAAAAGTGCCTTTTGTAAATTTAAAACAATTACCATTTTTCTATTACTCTGACAGTCCATGTGAGTCTCAT

GGAAAAAAGTAGTGTGATATAGATTATGTACCACTAAAGTCTGCTACGTGTATAACACGTTGCAATTTAGGTGGTGTGCTGTGTGACATCATGCTAATGAGTACAG  
19150 19160 19170 19180 19190 19200 19210 19220 19230 19240 19250

Wild ORF1ab GGAAAAAAGTAGTGTGATATAGATTATGTACCACTAAAGTCTGCTACGTGTATAACACGTTGCAATTTAGGTGGTGTGCTGTGTGACATCATGCTAATGAGTACAG  
Vac ORF1ab GGAAAAAAGTAGTGTGATATAGATTATGTACCACTAAAGTCTGCTACGTGTATAACACGTTGCAATTTAGGTGGTGTGCTGTGTGACATCATGCTAATGAGTACAG

ATTGTATCTCGATGCTTATAACATGATGATCTCAGCTGGCTTTAGCTTGTGGGTTTACAAACAATTTGATACTTATAACCTCTGGAACACTTTTACAAGACTTCAGAGTT  
19260 19270 19280 19290 19300 19310 19320 19330 19340 19350 19360

Wild ORF1ab ATTGTATCTCGATGCTTATAACATGATGATCTCAGCTGGCTTTAGCTTGTGGGTTTACAAACAATTTGATACTTATAACCTCTGGAACACTTTTACAAGACTTCAGAGTT  
Vac ORF1ab ATTGTATCTCGATGCTTATAACATGATGATCTCAGCTGGCTTTAGCTTGTGGGTTTACAAACAATTTGATACTTATAACCTCTGGAACACTTTTACAAGACTTCAGAGTT

TAGAAAATGTTGGCTTTTAAATGTTGTTAAATAAGGGACACTTTGATGGACAACAGGGTGAAGTACCAGTTTCTATCATTAATAACACTGTTTACACAAAAGTTGATGGTGT  
19370 19380 19390 19400 19410 19420 19430 19440 19450 19460 19470

Wild ORF1ab TAGAAAATGTTGGCTTTTAAATGTTGTTAAATAAGGGACACTTTGATGGACAACAGGGTGAAGTACCAGTTTCTATCATTAATAACACTGTTTACACAAAAGTTGATGGTGT  
Vac ORF1ab TAGAAAATGTTGGCTTTTAAATGTTGTTAAATAAGGGACACTTTGATGGACAACAGGGTGAAGTACCAGTTTCTATCATTAATAACACTGTTTACACAAAAGTTGATGGTGT

GATGTAGAATTTGTTTAAAAATAAAACAACATTACCTGTTAATGTAGCATTGAGCTTTGGGCTAAGCGCAACATTAACCAGTACCAGAGGTGAAAATACTCAATAATTT  
19480 19490 19500 19510 19520 19530 19540 19550 19560 19570 19580

Wild ORF1ab GATGTAGAATTTGTTTAAAAATAAAACAACATTACCTGTTAATGTAGCATTGAGCTTTGGGCTAAGCGCAACATTAACCAGTACCAGAGGTGAAAATACTCAATAATTT  
Vac ORF1ab GATGTAGAATTTGTTTAAAAATAAAACAACATTACCGTTAATGTAGCATTGAGCTTTGGGCTAAGCGCAACATTAACCAGTACCAGAGGTGAAAATACTCAATAATTT

GGGTGTGGACATTGCTGCTAATACTGTGATCTGGGACTACAAAAGAGATGCTCCAGCACATATATCTACTATTTGGTGTGTTGTTCTATGACTGACATAGCCAAGAAACCAA  
19590 19600 19610 19620 19630 19640 19650 19660 19670 19680 19690

Wild ORF1ab GGGTGTGGACATTGCTGCTAATACTGTGATCTGGGACTACAAAAGAGATGCTCCAGCACATATATCTACTATTTGGTGTGTTGTTCTATGACTGACATAGCCAAGAAACCAA  
Vac ORF1ab GGGTGTGGACATTGCTGCTAATACTGTGATCTGGGACTACAAAAGAGATGCTCCAGCACATATATCTACTATTTGGTGTGTTGTTCTATGACTGACATAGCCAAGAAACCAA

CTGAAACGATTTGTGCACCACCTCACCTGCTTTTTTTGATGGTAGAGTTGATGGTCAAGTAGACTTTATTTAGAAATGCCCGTAATGGTGTTCCTTATTACAGAAGGTAGTGT  
19700 19710 19720 19730 19740 19750 19760 19770 19780 19790 19800

Wild ORF1ab CTGAAACGATTTGTGCACCACCTCACCTGCTTTTTTTGATGGTAGAGTTGATGGTCAAGTAGACTTTATTTAGAAATGCCCGTAATGGTGTTCCTTATTACAGAAGGTAGTGT  
Vac ORF1ab CTGAAACGATTTGTGCACCACCTCACCTGCTTTTTTTGATGGTAGAGTTGATGGTCAAGTAGACTTTATTTAGAAATGCCCGTAATGGTGTTCCTTATTACAGAAGGTAGTGT

AAAGGTTTACAACCATCTGTAGGTCCCAAACAAGCTAGTCTTAAATGGAGTTCACATTAATTTGGAGAAGCCGTAAAAACACAGTTCAATTAATTATAAGAAAAGTTGATGGTGT  
19810 19820 19830 19840 19850 19860 19870 19880 19890 19900 19910

Wild ORF1ab AAAGGTTTACAACCATCTGTAGGTCCCAAACAAGCTAGTCTTAAATGGAGTTCACATTAATTTGGAGAAGCCGTAAAAACACAGTTCAATTAATTATAAGAAAAGTTGATGGTGT  
Vac ORF1ab AAAGGTTTACAACCATCTGTAGGTCCCAAACAAGCTAGTCTTAAATGGAGTTCACATTAATTTGGAGAAGCCGTAAAAACACAGTTCAATTAATTATAAGAAAAGTTGATGGTGT

TGTCCAACAATTACCTGAAACTTACTTTACTCAGAGTAGAAAATTTACAAGAAATTTAAACCCAGGAGTCAAATGGAAATTTGATTTCTTAGAATTAGCTATGGATGAATTCA  
19920 19930 19940 19950 19960 19970 19980 19990 20000 20010 20020

Wild ORF1ab TGTCCAACAATTACCTGAAACTTACTTTACTCAGAGTAGAAAATTTACAAGAAATTTAAACCCAGGAGTCAAATGGAAATTTGATTTCTTAGAATTAGCTATGGATGAATTCA  
Vac ORF1ab TGTCCAACAATTACCTGAAACTTACTTTACTCAGAGTAGAAAATTTACAAGAAATTTAAACCCAGGAGTCAAATGGAAATTTGATTTCTTAGAATTAGCTATGGATGAATTCA



TTGAACGGTATAAAATTAGAAGGCTATGCCITTCGAACATATCGITTTATGGAGATTTTATGTCATAGTCAGTTAGGTTGGTTTACATCTACTGATTGGACTAGCTAAACGTTTT  
20030 20040 20050 20060 20070 20080 20090 20100 20110 20120 20130

Wild ORFlab TTGAACGGTATAAAATTAGAAGGCTATGCCITTCGAACATATCGITTTATGGAGATTTTATGTCATAGTCAGTTAGGTTGGTTTACATCTACTGATTGGACTAGCTAAACGTTTT  
Vac ORFlab TTGAACGGTATAAAATTAGAAGGCTATGCCITTCGAACATATCGITTTATGGAGATTTTATGTCATAGTCAGTTAGGTTGGTTTACATCTACTGATTGGACTAGCTAAACGTTTT

AAGGAATCACCTTTTGAATTAGAAGATTTTATTCCTATGGACAGTACAGTTAAAACTATTTTCATAACAGATGCCCAAACAGGTTTCATCTAAGTGTGTGTGTCTCTGTAT  
20140 20150 20160 20170 20180 20190 20200 20210 20220 20230 20240

Wild ORFlab AAGGAATCACCTTTTGAATTAGAAGATTTTATTCCTATGGACAGTACAGTTAAAACTATTTTCATAACAGATGCCCAAACAGGTTTCATCTAAGTGTGTGTGTCTCTGTAT  
Vac ORFlab AAGGAATCACCTTTTGAATTAGAAGATTTTATTCCTATGGACAGTACAGTTAAAACTATTTTCATAACAGATGCCCAAACAGGTTTCATCTAAGTGTGTGTGTCTCTGTAT

TGATTTATTACTTTGATGATTTTGTGTGAAATAATAAAAATCCCAAGATTTATCTGTAGTTTCTAAGGTTGTCAAAGTACTATTGACTATACAGAAAATTTTCATTTATGCTTT  
20250 20260 20270 20280 20290 20300 20310 20320 20330 20340 20350

Wild ORFlab TGATTTATTACTTTGATGATTTTGTGTGAAATAATAAAAATCCCAAGATTTATCTGTAGTTTCTAAGGTTGTCAAAGTACTATTGACTATACAGAAAATTTTCATTTATGCTTT  
Vac ORFlab TGATTTATTACTTTGATGATTTTGTGTGAAATAATAAAAATCCCAAGATTTATCTGTAGTTTCTAAGGTTGTCAAAGTACTATTGACTATACAGAAAATTTTCATTTATGCTTT

GGTGTAAAGATGGCCATGTAGAAACATTTTACCCAAAATTTACAATCTAGTCAAGCGTGGCAACCGGGTGTGTCTATGCCTAATCTTTACAAAATGCAAAGAATGCTATTA  
20360 20370 20380 20390 20400 20410 20420 20430 20440 20450 20460

Wild ORFlab GGTGTAAAGATGGCCATGTAGAAACATTTTACCCAAAATTTACAATCTAGTCAAGCGTGGCAACCGGGTGTGTCTATGCCTAATCTTTACAAAATGCAAAGAATGCTATTA  
Vac ORFlab GGTGTAAAGATGGCCATGTAGAAACATTTTACCCAAAATTTACAATCTAGTCAAGCGTGGCAACCGGGTGTGTCTATGCCTAATCTTTACAAAATGCAAAGAATGCTATTA

GAAAAGTGTGACCTTCAAAAATTATGGTGTATAGTGTCAACATTACCTAAAGGCATAATGATGAATGTGCGAAAATATACTCAACTGTGTGCAATATTTAAACACATTAACATT  
20470 20480 20490 20500 20510 20520 20530 20540 20550 20560 20570

Wild ORFlab GAAAAGTGTGACCTTCAAAAATTATGGTGTATAGTGTCAACATTACCTAAAGGCATAATGATGAATGTGCGAAAATATACTCAACTGTGTGCAATATTTAAACACATTAACATT  
Vac ORFlab GAAAAGTGTGACCTTCAAAAATTATGGTGTATAGTGTCAACATTACCTAAAGGCATAATGATGAATGTGCGAAAATATACTCAACTGTGTGCAATATTTAAACACATTAACATT

AGCTGTACCCTATAATATGAGAGTTATACATTTTGGTGTCTGGTTCTGTATAAAGGAGTTGCACCAGGTACAGCTGTPTTAAGACAGTGGTTGCCTACGGGTACGCTGCTTG  
20580 20590 20600 20610 20620 20630 20640 20650 20660 20670 20680

Wild ORFlab AGCTGTACCCTATAATATGAGAGTTATACATTTTGGTGTCTGGTTCTGTATAAAGGAGTTGCACCAGGTACAGCTGTPTTAAGACAGTGGTTGCCTACGGGTACGCTGCTTG  
Vac ORFlab AGCTGTACCCTATAATATGAGAGTTATACATTTTGGTGTCTGGTTCTGTATAAAGGAGTTGCACCAGGTACAGCTGTPTTAAGACAGTGGTTGCCTACGGGTACGCTGCTTG

TCGATTCAGATCTTAAATGACTTTTGTCTCTGATGCAGATTCAACTTTGATTTGGTGTATTTGTGCAACTGTACATACAGCTAATAAATGGGATCTCATTATTAGTATATGTAC  
20690 20700 20710 20720 20730 20740 20750 20760 20770 20780 20790

Wild ORFlab TCGATTCAGATCTTAAATGACTTTTGTCTCTGATGCAGATTCAACTTTGATTTGGTGTATTTGTGCAACTGTACATACAGCTAATAAATGGGATCTCATTATTAGTATATGTAC  
Vac ORFlab TCGATTCAGATCTTAAATGACTTTTGTCTCTGATGCAGATTCAACTTTGATTTGGTGTATTTGTGCAACTGTACATACAGCTAATAAATGGGATCTCATTATTAGTATATGTAC



ATGTTTGTTTTCTTGTTTTATTGCCACTAGTCTCTAGTCAGTGTGTTAATCTTTACAACCAGAACTCAATTTACCCCTGCATACACTAATTTCTTTACACACGTGGTGTTTA  
10 20 30 40 50 60 70 80 90 100 110

Wild S ATGTTTGTTTTCTTGTTTTATTGCCACTAGTCTCTAGTCAGTGTGTTAATCTTTACAACCAGAACTCAATTTACCCCTGCATACACTAATTTCTTTACACACGTGGTGTTTA  
Vac S ATGTTTGTTTTCTTGTTTTATTGCCACTAGTCTCTAGTCAGTGTGTTAATCTTTACAACCAGAACTCAATTTACCCCTGCATACACTAATTTCTTTACACACGTGGTGTTTA

TTGCCCTGACAAAGTTTTTCAGATCCTCAGTTTTACATTTCAACTCAGGACTTGTTCCTTACCTTTCTTTTCCAATGTTACTTTGGTTCCATGCTATACATGTCCTCTGGGACCA  
120 130 140 150 160 170 180 190 200 210 220

Wild S TTGCCCTGACAAAGTTTTTCAGATCCTCAGTTTTACATTTCAACTCAGGACTTGTTCCTTACCTTTCTTTTCCAATGTTACTTTGGTTCCATGCTATACATGTCCTCTGGGACCA  
Vac S TTGCCCTGACAAAGTTTTTCAGATCCTCAGTTTTACATTTCAACTCAGGACTTGTTCCTTACCTTTCTTTTCCAATGTTACTTTGGTTCCATGCTATACATGTCCTCTGGGACCA

ATGGTACTAAGAGGTTTGATAACCCCTGTCCTACCATTTAATGATGGTGTTTATTTTGCCTTCCATTTGGGAAGTCTAACATAATAAGAGGCTGGATTTTTGGTACTACTTTA  
230 240 250 260 270 280 290 300 310 320 330

Wild S ATGGTACTAAGAGGTTTGATAACCCCTGTCCTACCATTTAATGATGGTGTTTATTTTGCCTTCCATTTGGGAAGTCTAACATAATAAGAGGCTGGATTTTTGGTACTACTTTA  
Vac S ATGGTACTAAGAGGTTTGATAACCCCTGTCCTACCATTTAATGATGGTGTTTATTTTGCCTTCCATTTGAGAAGTCTAACATAATAAGAGGCTGGATTTTTGGTACTACTTTA

GATTCGAAGACCCAGTCCCTACTTTATTTGTTAATAACGCTACTAATGTTGTTATTTAAAGTCTGTGAATTTCAATTTTGTAAATGATCCATTTTTGGGIGTTTTATTACCACAA  
340 350 360 370 380 390 400 410 420 430 440

Wild S GATTCGAAGACCCAGTCCCTACTTTATTTGTTAATAACGCTACTAATGTTGTTATTTAAAGTCTGTGAATTTCAATTTTGTAAATGATCCATTTTTGGGIGTTTTATTACCACAA  
Vac S GATTCGAAGACCCAGTCCCTACTTTATTTGTTAATAACGCTACTAATGTTGTTATTTAAAGTCTGTGAATTTCAATTTTGTAAATGATCCATTTTTGGGIGTTTTATTACCACAA

AAACAACAAAGTTGGATGGAAAGTGAGTTTCAGAGTTTATTCTAGTGGGAATAAATGTCACCTTTTGAATAATGTCCTCTCAGCCTTTTCTTATGGACCTTGAAGGAAAAACAGG  
450 460 470 480 490 500 510 520 530 540 550

Wild S AAACAACAAAGTTGGATGGAAAGTGAGTTTCAGAGTTTATTCTAGTGGGAATAAATGTCACCTTTTGAATAATGTCCTCTCAGCCTTTTCTTATGGACCTTGAAGGAAAAACAGG  
Vac S AAACAACAAAGTTGGATGGAAAGTGAGTTTCAGAGTTTATTCTAGTGGGAATAAATGTCACCTTTTGAATAATGTCCTCTCAGCCTTTTCTTATGGACCTTGAAGGAAAAACAGG

GTAAGTTCAAAAATCTTAGGGAATTTGIGTTTTAAGAATATTGATGGTTATTTTAAAATATATTTCTAAGCACACGCCATTAAATTTAGTGGGIGATCTCCCTCAGGGTTTT  
560 570 580 590 600 610 620 630 640 650 660

Wild S GTAAGTTCAAAAATCTTAGGGAATTTGIGTTTTAAGAATATTGATGGTTATTTTAAAATATATTTCTAAGCACACGCCATTAAATTTAGTGGGIGATCTCCCTCAGGGTTTT  
Vac S GTAAGTTCAAAAATCTTAGGGAATTTGIGTTTTAAGAATATTGATGGTTATTTTAAAATATATTTCTAAGCACACGCCATTAAATTTAGTGGGIGATCTCCCTCAGGGTTTT

TCGGCTTTTAGAACCATTGGTAGATTTGCCAATAGGTATTTAACATCACTAGGTTTCAAACCTTTACTTTGCTTTTACATAGAAGTTATTTGACTCCTGGGIGATTCTTCTTCAGG  
670 680 690 700 710 720 730 740 750 760 770

Wild S TCGGCTTTTAGAACCATTGGTAGATTTGCCAATAGGTATTTAACATCACTAGGTTTCAAACCTTTACTTTGCTTTTACATAGAAGTTATTTGACTCCTGGGIGATTCTTCTTCAGG  
Vac S TCGGCTTTTAGAACCATTGGTAGATTTGCCAATAGGTATTTAACATCACTAGGTTTCAAACCTTTACTTTGCTTTTACATAGAAGTTATTTGACTCCTGGGIGATTCTTCTTCAGG

TTGGACAGCTGGTGTGCAGCTTATTATGTGGGTTATCTTCAACCTAGGACTTTTCTATTAAAAATATAATGAAAATGGAACCATTACAGATGCTGTAGACTGTGCACTTG  
780 790 800 810 820 830 840 850 860 870 880

Wild S TTGGACAGCTGGTGTGCAGCTTATTATGTGGGTTATCTTCAACCTAGGACTTTTCTATTAAAAATATAATGAAAATGGAACCATTACAGATGCTGTAGACTGTGCACTTG  
Vac S TTGGACAGCTGGTGTGCAGCTTATTATGTGGGTTATCTTCAACCTAGGACTTTTCTATTAAAAATATAATGAAAATGGAACCATTACAGATGCTGTAGACTGTGCACTTG

ACCTCTCTCAGAAACAAAGTGTACGTTGAAATCCTTCACGTGAGAAAAGGAATCTATCAAACCTCTAACTTTAGAGTCCAACCAACAGAATCTATTGTTAGATTTCCCT  
890 900 910 920 930 940 950 960 970 980 990

Wild S ACCTCTCTCAGAAACAAAGTGTACGTTGAAATCCTTCACGTGAGAAAAGGAATCTATCAAACCTCTAACTTTAGAGTCCAACCAACAGAATCTATTGTTAGATTTCCCT  
Vac S ACCTCTCTCAGAAACAAAGTGTACGTTGAAATCCTTCACGTGAGAAAAGGAATCTATCAAACCTCTAACTTTAGAGTCCAACCAACAGAATCTATTGTTAGATTTCCCT

AATATTACAAACTTGTGCCCCTTTGGTGAAGTTTTTAACGCCACCAGATTTGCATCTGTTTTATGCTTTGGAACAGGAAGAGAATCAGCAACTGTGTTGCTGATTATTCTGT  
1000 1010 1020 1030 1040 1050 1060 1070 1080 1090 1100

Wild S AATATTACAAACTTGTGCCCCTTTGGTGAAGTTTTTAACGCCACCAGATTTGCATCTGTTTTATGCTTTGGAACAGGAAGAGAATCAGCAACTGTGTTGCTGATTATTCTGT  
Vac S AATATTACAAACTTGTGCCCCTTTGGTGAAGTTTTTAACGCCACCAGATTTGCATCTGTTTTATGCTTTGGAACAGGAAGAGAATCAGCAACTGTGTTGCTGATTATTCTGT

CCTATATAAATCCGCATCATTTTCCACTTTTAAAGTGTATGGAGTGTCTCCTACTAAATTTAAATGATCTCTGCTTTACTAATGTCTATGCAGATTCATTTGTAATTAGAG  
1110 1120 1130 1140 1150 1160 1170 1180 1190 1200 1210

Wild S CCTATATAAATCCGCATCATTTTCCACTTTTAAAGTGTATGGAGTGTCTCCTACTAAATTTAAATGATCTCTGCTTTACTAATGTCTATGCAGATTCATTTGTAATTAGAG  
Vac S CCTATATAAATCCGCATCATTTTCCACTTTTAAAGTGTATGGAGTGTCTCCTACTAAATTTAAATGATCTCTGCTTTACTAATGTCTATGCAGATTCATTTGTAATTAGAG

GTGATGAAGTCAGACAAATCGCTCCAGGGCAAACCTGGAAAGATTGCTGATTATAAATTTATAAAATACCAGATGATTTTACAGGCTGCGTTATAGCTTTGGAATTTCTAACAAT  
1220 1230 1240 1250 1260 1270 1280 1290 1300 1310 1320

Wild S GTGATGAAGTCAGACAAATCGCTCCAGGGCAAACCTGGAAAGATTGCTGATTATAAATTTATAAAATACCAGATGATTTTACAGGCTGCGTTATAGCTTTGGAATTTCTAACAAT  
Vac S GTGATGAAGTCAGACAAATCGCTCCAGGGCAAACCTGGAAAGATTGCTGATTATAAATTTATAAAATACCAGATGATTTTACAGGCTGCGTTATAGCTTTGGAATTTCTAACAAT

CTTGATTCTAAGGTTGGTGGTAATTATAAATACCCTGTATAGATTGTTTAGGAAGTCTAATCTCAAACCTTTTGGAGAGAGATATTTCAACTGAAATCTATCAGGCCGGTAG  
1330 1340 1350 1360 1370 1380 1390 1400 1410 1420 1430

Wild S CTTGATTCTAAGGTTGGTGGTAATTATAAATACCCTGTATAGATTGTTTAGGAAGTCTAATCTCAAACCTTTTGGAGAGAGATATTTCAACTGAAATCTATCAGGCCGGTAG  
Vac S CTTGATTCTAAGGTTGGTGGTAATTATAAATACCCTGTATAGATTGTTTAGGAAGTCTAATCTCAAACCTTTTGGAGAGAGATATTTCAACTGAAATCTATCAGGCCGGTAG

CACACCTTGTAAATGGTGTGAAGTTTTAATTTGTTACTTTCCCTTTACAATCATATGGTTTCCAACCCACTAATGGTGTGGTTACCAACCATAACAGAGTAGTAGTACTTT  
1440 1450 1460 1470 1480 1490 1500 1510 1520 1530 1540

Wild S CACACCTTGTAAATGGTGTGAAGTTTTAATTTGTTACTTTCCCTTTACAATCATATGGTTTCCAACCCACTAATGGTGTGGTTACCAACCATAACAGAGTAGTAGTACTTT  
Vac S CACACCTTGTAAATGGTGTGAAGTTTTAATTTGTTACTTTCCCTTTACAATCATATGGTTTCCAACCCACTAATGGTGTGGTTACCAACCATAACAGAGTAGTAGTACTTT

CTTTTGAAC TTC TACATGC ACCAGCAACTG TTTGTGGACCTAAAAAGTCTACTAATTTGGTTAAAAACAAATG TGTCAATTTCAACTTCAATGGTTTAACAGGCACAGGT

1550 1560 1570 1580 1590 1600 1610 1620 1630 1640 1650

Wild S CTTTGTGAAC TTC TACATGC ACCAGCAACTG TTTGTGGACCTAAAAAGTCTACTAATTTGGTTAAAAACAAATG TGTCAATTTCAACTTCAATGGTTTAACAGGCACAGGT

Vac S CTTTGTGAAC TTC TACATGC ACCAGCAACTG TTTGTGGACCTAAAAAGTCTACTAATTTGGTTAAAAACAAATG TGTCAATTTCAACTTCAATGGTTTAACAGGCACAGGT

GTTCTTACTGAGICTAACAAAAAGTTTCGCTTTCCAACAATTTGGCAGAGACATTTGCTGACACTACTGATGCTGTCGGTGATCCACAGACACTTGAGATTCTTGACAT

1660 1670 1680 1690 1700 1710 1720 1730 1740 1750 1760

Wild S GTTCTTACTGAGICTAACAAAAAGTTTCGCTTTCCAACAATTTGGCAGAGACATTTGCTGACACTACTGATGCTGTCGGTGATCCACAGACACTTGAGATTCTTGACAT

Vac S GTTCTTACTGAGICTAACAAAAAGTTTCGCTTTCCAACAATTTGGCAGAGACATTTGCTGACACTACTGATGCTGTCGGTGATCCACAGACACTTGAGATTCTTGACAT

TACACCATGTTCTTTTGGTGGTGTG CAGTGTATAACACCAGGAACAAATACTTCTAACCAGGTTGCTGTTCTTTATCAGGATGTTAACTGCACAGAAGTCCCTGTTGCTA

1770 1780 1790 1800 1810 1820 1830 1840 1850 1860 1870

Wild S TACACCATGTTCTTTTGGTGGTGTG CAGTGTATAACACCAGGAACAAATACTTCTAACCAGGTTGCTGTTCTTTATCAGGATGTTAACTGCACAGAAGTCCCTGTTGCTA

Vac S TACACCATGTTCTTTTGGTGGTGTG CAGTGTATAACACCAGGAACAAATACTTCTAACCAGGTTGCTGTTCTTTATCAGGATGTTAACTGCACAGAAGTCCCTGTTGCTA

TTCATGCAGATCAACTTACTCCTACTTGGCGTGTATTATCTACAGGTTCTAATGTTTTTCAAACACGTGCAGGCTGTTAATAGGGGCTGAACATGTCAACAACATCATAT

1880 1890 1900 1910 1920 1930 1940 1950 1960 1970 1980

Wild S TTCATGCAGATCAACTTACTCCTACTTGGCGTGTATTATCTACAGGTTCTAATGTTTTTCAAACACGTGCAGGCTGTTAATAGGGGCTGAACATGTCAACAACATCATAT

Vac S TTCATGCAGATCAACTTACTCCTACTTGGCGTGTATTATCTACAGGTTCTAATGTTTTTCAAACACGTGCAGGCTGTTAATAGGGGCTGAACATGTCAACAACATCATAT

GAGTGTGACATACCCATTTGGTGCAGGTATATGCGCTAGTTATCAGACTCAGACTAATTTCTCCTCGGCGGGCACGTAGTGTAGCTAGTCAATCCATCATTGCTTACACTAT

1990 2000 2010 2020 2030 2040 2050 2060 2070 2080 2090

Wild S GAGTGTGACATACCCATTTGGTGCAGGTATATGCGCTAGTTATCAGACTCAGACTAATTTCTCCTCGGCGGGCACGTAGTGTAGCTAGTCAATCCATCATTGCTTACACTAT

Vac S GAGTGTGACATACCCATTTGGTGCAGGTATATGCGCTAGTTATCAGACTCAGACTAATTTCTCCTCGGCGGGCACGTAGTGTAGCTAGTCAATCCATCATTGCTTACACTAT

GTCACTTGGTGCAGAAAATTCAGTTGCTTACTCTAATAACTCTATTGCCATACCCACAAAATTTTACTATTAGTGTACCACAGAAAATCTACCAGTGTCTATGACCAAGA

2100 2110 2120 2130 2140 2150 2160 2170 2180 2190 2200

Wild S GTCACTTGGTGCAGAAAATTCAGTTGCTTACTCTAATAACTCTATTGCCATACCCACAAAATTTTACTATTAGTGTACCACAGAAAATCTACCAGTGTCTATGACCAAGA

Vac S GTCACTTGGTGCAGAAAATTCAGTTGCTTACTCTAATAACTCTATTGCCATACCCACAAAATTTTACTATTAGTGTACCACAGAAAATCTACCAGTGTCTATGACCAAGA

CATCAGTAGATTGTACAATGTACATTTGTTGGTGGTGTG CAGTGTATAACACCAGGAACAAATACTTCTAACCAGGTTGCTGTTCTTTATCAGGATGTTAACTGCACAGAAGTCCCTGTTGCTA

2210 2220 2230 2240 2250 2260 2270 2280 2290 2300 2310

Wild S CATCAGTAGATTGTACAATGTACATTTGTTGGTGGTGTG CAGTGTATAACACCAGGAACAAATACTTCTAACCAGGTTGCTGTTCTTTATCAGGATGTTAACTGCACAGAAGTCCCTGTTGCTA

Vac S CATCAGTAGATTGTACAATGTACATTTGTTGGTGGTGTG CAGTGTATAACACCAGGAACAAATACTTCTAACCAGGTTGCTGTTCTTTATCAGGATGTTAACTGCACAGAAGTCCCTGTTGCTA

GCTGTTGAACAAGACAAAAACACCCAAGAGTTTTTGCACAAGTCAAAACAAATTTACAAAAACACCACCAATTAAGATTTTTGGTGGTTTTTAATTTTTTCACAAATATTACC  
2320 2330 2340 2350 2360 2370 2380 2390 2400 2410 2420

Wild S GCTGTTGAACAAGACAAAAACACCCAAGAGTTTTTGCACAAGTCAAAACAAATTTACAAAAACACCACCAATTAAGATTTTTGGTGGTTTTTAATTTTTTCACAAATATTACC  
Vac S GCTGTTGAACAAGACAAAAACACCCAAGAGTTTTTGCACAAGTCAAAACAAATTTACAAAAACACCACCAATTAAGATTTTTGGTGGTTTTTAATTTTTTCACAAATATTACC

AGATCCATCAAACCAAGCAAGAGGTCATTTATTGAAGATCTACTTTTCAACAAAGTGACACTTGCAGATGCTGGCTTCATCAAACAATATGGTGGATTGCCTTGGTGATA  
2430 2440 2450 2460 2470 2480 2490 2500 2510 2520 2530

Wild S AGATCCATCAAACCAAGCAAGAGGTCATTTATTGAAGATCTACTTTTCAACAAAGTGACACTTGCAGATGCTGGCTTCATCAAACAATACGGTGGATTGCCTTGGTGATA  
Vac S AGATCCATCAAACCAAGCAAGAGGTCATTTATTGAAGATCTACTTTTCAACAAAGTGACACTTGCAGATGCTGGCTTCATCAAACAATATGGTGGATTGCCTTGGTGATA

TTGCTGCTAGAGACCTCATTTGTGCACAAAAGTTTTAACGGCCTTACTGTTTTGGCCACCTTTGCTCACAGATGAAATGATTGCTCAATACACTTCTGCACCTGTTAGCGGGT  
2540 2550 2560 2570 2580 2590 2600 2610 2620 2630 2640

Wild S TTGCTGCTAGAGACCTCATTTGTGCACAAAAGTTTTAACGGCCTTACTGTTTTGGCCACCTTTGCTCACAGATGAAATGATTGCTCAATACACTTCTGCACCTGTTAGCGGGT  
Vac S TTGCTGCTAGAGACCTCATTTGTGCACAAAAGTTTTAACGGCCTTACTGTTTTGGCCACCTTTGCTCACAGATGAAATGATTGCTCAATACACTTCTGCACCTGTTAGCGGGT

ACAATCACTTCTGGTTGGACCTTTGGTGCAGGTGCTGCATTACAAATACCATTGCTATGCAAATGGCTTATAGGTTTAAATGGTATTTGGAGTTACACAGAATGTTCTCTA  
2650 2660 2670 2680 2690 2700 2710 2720 2730 2740 2750

Wild S ACAATCACTTCTGGTTGGACCTTTGGTGCAGGTGCTGCATTACAAATACCATTGCTATGCAAATGGCTTATAGGTTTAAATGGTATTTGGAGTTACACAGAATGTTCTCTA  
Vac S ACAATCACTTCTGGTTGGACCTTTGGTGCAGGTGCTGCATTACAAATACCATTGCTATGCAAATGGCTTATAGGTTTAAATGGTATTTGGAGTTACACAGAATGTTCTCTA

TGAGAACCAAAAATTGATTGCCAACCAATTTAATAGTGTATTGGCAAAATTTCAAGACTCCTTTCTTCCACAGCAAGTGCCTTTGGAAAACCTTCAAGATGTGGTCAACC  
2760 2770 2780 2790 2800 2810 2820 2830 2840 2850 2860

Wild S TGAGAACCAAAAATTGATTGCCAACCAATTTAATAGTGTATTGGCAAAATTTCAAGACTCCTTTCTTCCACAGCAAGTGCCTTTGGAAAACCTTCAAGATGTGGTCAACC  
Vac S TGAGAACCAAAAATTGATTGCCAACCAATTTAATAGTGTATTGGCAAAATTTCAAGACTCCTTTCTTCCACAGCAAGTGCCTTTGGAAAACCTTCAAGATGTGGTCAACC

AAAATGCACAAGCTTTAAACACGCTTGTAAACAACCTTAGCTCCAAATTTGGTGCATTTCAAGTGTPTTAAATGATATCCTTTTCACGTCCTTGACAAAAGTTGAGGCTGAA  
2870 2880 2890 2900 2910 2920 2930 2940 2950 2960 2970

Wild S AAAATGCACAAGCTTTAAACACGCTTGTAAACAACCTTAGCTCCAAATTTGGTGCATTTCAAGTGTPTTAAATGATATCCTTTTCACGTCCTTGACAAAAGTTGAGGCTGAA  
Vac S AAAATGCACAAGCTTTAAACACGCTTGTAAACAACCTTAGCGCCAAATTTGGTGCATTTCAAGTGTPTTAAATGATATCCTTTTCACGTCCTTGACAAAAGTTGAGGCTGAA

GTGCAAATTTGATAGGTTGATCACAGGCAGACTTCAAAGTTTGCAGACATATGTGACTCAACAATTAATTTAGAGCTGCAGAAATCAGAGCTTCTGCTAATCTTGTGCTAC  
2980 2990 3000 3010 3020 3030 3040 3050 3060 3070 3080

Wild S GTGCAAATTTGATAGGTTGATCACAGGCAGACTTCAAAGTTTGCAGACATATGTGACTCAACAATTAATTTAGAGCTGCAGAAATCAGAGCTTCTGCTAATCTTGTGCTAC  
Vac S GTGCAAATTTGATAGGTTGATCACAGGCAGACTTCAAAGTTTGCAGACATATGTGACTCAACAATTAATTTAGAGCTGCAGAAATCAGAGCTTCTGCTAATCTTGTGCTAC

TAAAATGTCAGAGTGTGTACTTGGACAATCAAAAAGAGTTGATTTTTTGTGGAAAAGGGCTATCATCTTATGTCCCTCCCTCAGTCAGCACCTCATGGGTAGTCTTCTTGC  
3090 3100 3110 3120 3130 3140 3150 3160 3170 3180 3190

Wild S TAAAATGTCAGAGTGTGTACTTGGACAATCAAAAAGAGTTGATTTTTTGTGGAAAAGGGCTATCATCTTATGTCCCTCCCTCAGTCAGCACCTCATGGGTAGTCTTCTTGC  
Vac S TAAAATGTCAGAGTGTGTACTTGGACAATCAAAAAGAGTTGATTTTTTGTGGAAAAGGGCTATCATCTTATGTCCCTCCCTCAGTCAGCACCTCATGGGTAGTCTTCTTGC

ATGTGACTTATGTCCCTGCACAAGAAAAGAACTTCACAACGTCTCCGCCATTTGTCATGATGGAAAAGCACACTTTCCTCGTGAAGGIGTCTTTGTTTCAAATGGCACA  
3200 3210 3220 3230 3240 3250 3260 3270 3280 3290 3300

Wild S ATGTGACTTATGTCCCTGCACAAGAAAAGAACTTCACAACGTCTCCGCCATTTGTCATGATGGAAAAGCACACTTTCCTCGTGAAGGIGTCTTTGTTTCAAATGGCACA  
Vac S ATGTGACTTATGTCCCTGCACAAGAAAAGAACTTCACAACGTCTCCGCCATTTGTCATGATGGAAAAGCACACTTTCCTCGTGAAGGIGTCTTTGTTTCAAATGGCACA

CACTGGTTTTGTAACACAAAGGAATTTTTATGAACCACAAATCATTACTACAGACAACACATTTGIGICTGGTAACTGIGATGTTGTAATAGGAATTTGTCAACAACACAGT  
3310 3320 3330 3340 3350 3360 3370 3380 3390 3400 3410

Wild S CACTGGTTTTGTAACACAAAGGAATTTTTATGAACCACAAATCATTACTACAGACAACACATTTGIGICTGGTAACTGIGATGTTGTAATAGGAATTTGTCAACAACACAGT  
Vac S CACTGGTTTTGTAACACAAAGGAATTTTTATGAACCACAAATCATTACTACAGACAACACATTTGIGICTGGTAACTGIGATGTTGTAATAGGAATTTGTCAACAACACAGT

TTATGATCCTTTGCAACCTGAATTAGACTCATTCAAGGAGGAGTTAGATAAATATTTAAGAATCATAACATCACCAGATGTTGATTTAGGTGACATCTCTGGCATTAAATG  
3420 3430 3440 3450 3460 3470 3480 3490 3500 3510 3520

Wild S TTATGATCCTTTGCAACCTGAATTAGACTCATTCAAGGAGGAGTTAGATAAATATTTAAGAATCATAACATCACCAGATGTTGATTTAGGTGACATCTCTGGCATTAAATG  
Vac S TTATGATCCTTTGCAACCTGAATTAGACTCATTCAAGGAGGAGTTAGATAAATATTTAAGAATCATAACATCACCAGATGTTGATTTAGGTGACATCTCTGGCATTAAATG

CTTCAGTTGTAAACATTCAAAAAGAAATTTGACCGCTCAATGAGGTTGCCAAGAATTTAAATGAATCTCTCATCGATCTCCAAGAACTTTGGAAAGTATGAGCAGTATATA  
3530 3540 3550 3560 3570 3580 3590 3600 3610 3620 3630

Wild S CTTCAGTTGTAAACATTCAAAAAGAAATTTGACCGCTCAATGAGGTTGCCAAGAATTTAAATGAATCTCTCATCGATCTCCAAGAACTTTGGAAAGTATGAGCAGTATATA  
Vac S CTTCAGTTGTAAACATTCAAAAAGAAATTTGACCGCTCAATGAGGTTGCCAAGAATTTAAATGAATCTCTCATCGATCTCCAAGAACTTTGGAAAGTATGAGCAGTATATA

AAATGGCCATGGTACATTTGGCTAGGTTTTATAGCTGGCTTGATTGCCATAGTAATGGTGGACAATPATGCTTTGCTGTATGACCAGTTGCTGTAGTTGTCTCAAGGGCTG  
3640 3650 3660 3670 3680 3690 3700 3710 3720 3730 3740

Wild S AAATGGCCATGGTACATTTGGCTAGGTTTTATAGCTGGCTTGATTGCCATAGTAATGGTGGACAATPATGCTTTGCTGTATGACCAGTTGCTGTAGTTGTCTCAAGGGCTG  
Vac S AAATGGCCATGGTACATTTGGCTAGGTTTTATAGCTGGCTTGATTGCCATAGTAATGGTGGACAATPATGCTTTGCTGTATGACCAGTTGCTGTAGTTGTCTCAAGGGCTG

TGTTCTTTGIGGATCCCTGCTGCAAATTTGATGAAGACGACTCTGAGCCAGTGTCTCAAAGGAGTCAAATTTACATTTACACATAA  
3750 3760 3770 3780 3790 3800 3810 3820

Wild S TGTTCTTTGIGGATCCCTGCTGCAAATTTGATGAAGACGACTCTGAGCCAGTGTCTCAAAGGAGTCAAATTTACATTTACACATAA  
Vac S TGTTCTTTGIGGATCCCTGCTGCAAATTTGATGAAGACGACTCTGAGCCAGTGTCTCAAAGGAGTCAAATTTACATTTACACATAA

ATGGATTTGTTTATGAGAATCTTCACAAATGGAACTGTAACTTTGAAGCAAGGTGAAATCAAGGATGCTACTCCTTCAGATTTTGTTCGCGCTACTGCAACGATAACCGAT  
10 20 30 40 50 60 70 80 90 100 110

Wild ORF3a ATGGATTTGTTTATGAGAATCTTCACAAATGGAACTGTAACTTTGAAGCAAGGTGAAATCAAGGATGCTACTCCTTCAGATTTTGTTCGCGCTACTGCAACGATAACCGAT  
Vac ORF3a ATGGATTTGTTTATGAGAATCTTCACAAATGGAACTGTAACTTTGAAGCAAGGTGAAATCAAGGATGCTACTCCTTCAGATTTTGTTCGCGCTACTGCAACGATAACCGAT

ACAAGCCTCACTCCCCTTTCGGATGGCTTATTTGTTGGCGTTGCACCTTCCTTGCTGTTTTTCAGAGCGCTTCCAAAATCATAACCCCTCAAAAAGAGATGGCAACTAGCACTCT  
120 130 140 150 160 170 180 190 200 210 220

Wild ORF3a ACAAGCCTCACTCCCCTTTCGGATGGCTTATTTGTTGGCGTTGCACCTTCCTTGCTGTTTTTCAGAGCGCTTCCAAAATCATAACCCCTCAAAAAGAGATGGCAACTAGCACTCT  
Vac ORF3a ACAAGCCTCACTCCCCTTTCGGATGGCTTATTTGTTGGCGTTGCACCTTCCTTGCTGTTTTTCAGAGCGCTTCCAAAATCATAACCCCTCAAAAAGAGATGGCAACTAGCACTCT

CCAAGGGTGTTCACTTTGTTTGCAACTTGCTGTTGTTGTTGTTGTAACAGTTTACTCACACCTTTTGCCTGTTGCTGCTGGCCTTGAAGCCCTTTTCTCTATCTTTATGCT  
230 240 250 260 270 280 290 300 310 320 330

Wild ORF3a CCAAGGGTGTTCACTTTGTTTGCAACTTGCTGTTGTTGTTGTTGTTGTAACAGTTTACTCACACCTTTTGCCTGTTGCTGCTGGCCTTGAAGCCCTTTTCTCTATCTTTATGCT  
Vac ORF3a CCAAGGGTGTTCACTTTGTTTGCAACTTGCTGTTGTTGTTGTTGTTGTAACAGTTTACTCACACCTTTTGCCTGTTGCTGCTGGCCTTGAAGCCCTTTTCTCTATCTTTATGCT

TTAGICTACTTCTTTCAGAGTATAAACTTTGTTAAGAATAATAATGAGGCTTTGGCTTTGCTGGAAATGCCGTTCCAAAACCCATTACTTTTATGATGCCAACTATTTTTCT  
340 350 360 370 380 390 400 410 420 430 440

Wild ORF3a TTAGICTACTTCTTTCAGAGTATAAACTTTGTTAAGAATAATAATGAGGCTTTGGCTTTGCTGGAAATGCCGTTCCAAAACCCATTACTTTTATGATGCCAACTATTTTTCT  
Vac ORF3a TTAGICTACTTCTTTCAGAGTATAAACTTTGTTAAGAATAATAATGAGGCTTTGGCTTTGCTGGAAATGCCGTTCCAAAACCCATTACTTTTATGATGCCAACTATTTTTCT

TTGCTGGCATACTAATTGTTTACGACTATTGTATACCTTACAATAGTGTAACTTCTTCAATTTGTCATTACTTTCAGGIGATGGCACAACAAGTCTATTCTTGAACATGACT  
450 460 470 480 490 500 510 520 530 540 550

Wild ORF3a TTGCTGGCATACTAATTGTTTACGACTATTGTATACCTTACAATAGTGTAACTTCTTCAATTTGTCATTACTTTCAGGIGATGGCACAACAAGTCTATTCTTGAACATGACT  
Vac ORF3a TTGCTGGCATACTAATTGTTTACGACTATTGTATACCTTACAATAGTGTAACTTCTTCAATTTGTCATTACTTTCAGGIGATGGCACAACAAGTCTATTCTTGAACATGACT

ACCAGATTGGTGGTTATACTGAAAAATGGGAATCTGGAGTAAAAGACTGTGTGTTGTTATTACACAGTTACTTCACTTCAGACTATTACCAGCTGTACTCAACTCAATTGAGT  
560 570 580 590 600 610 620 630 640 650 660

Wild ORF3a ACCAGATTGGTGGTTATACTGAAAAATGGGAATCTGGAGTAAAAGACTGTGTGTTGTTATTACACAGTTACTTCACTTCAGACTATTACCAGCTGTACTCAACTCAATTGAGT  
Vac ORF3a ACCAGATTGGTGGTTATACTGAAAAATGGGAATCTGGAGTAAAAGACTGTGTGTTGTTATTACACAGTTACTTCACTTCAGACTATTACCAGCTGTACTCAACTCAATTGAGT

ACAGACACTGGTGTGTTGAACATGTTACCTTCTTCATCTACAATAAAAAATGTTGATGAGCCTGAAGAACATGTCCAAAATTCACACAATCGACGGTTCATCCGGAGTTGTTAA  
670 680 690 700 710 720 730 740 750 760 770

Wild ORF3a ACAGACACTGGTGTGTTGAACATGTTACCTTCTTCATCTACAATAAAAAATGTTGATGAGCCTGAAGAACATGTCCAAAATTCACACAATCGACGGTTCATCCGGAGTTGTTAA  
Vac ORF3a ACAGACACTGGTGTGTTGAACATGTTACCTTCTTCATCTACAATAAAAAATGTTGATGAGCCTGAAGAACATGTCCAAAATTCACACAATCGACGGTTCATCCGGAGTTGTTAA



  
TCCAGTAATGGAACCAATTTATGATGAACCGACGACGACTACTAGCGTGCCTTTGTAA  
780 790 800 810 820

Wild ORF3a TCCAGTAATGGAACCAATTTATGATGAACCGACGACGACTACTAGCGTGCCTTTGTAA  
Vac ORF3a TCCAGTAATGGAACCAATTTATGATGAACCGACGACGACTACTAGCGTGCCTTTGTAA

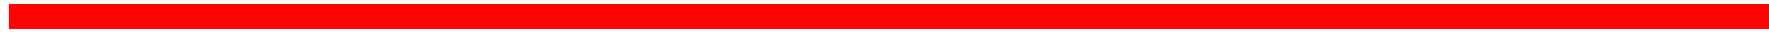

ATGTACTCATTCGTTTCGGAAGAGACAGGTACGTTAATAGTTAATAGCGTACTTCTTTTTCTTGCTTTCGGIGGTAATCTTGTCTAGTTACACTAGCCATCCTTACTGCGCT

10 20 30 40 50 60 70 80 90 100 110

Wild E ATGTA

Vac E ATGTA

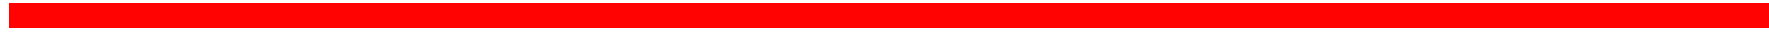

TCGATTGGIGGCGTACTGCTGCAATATTGTTAACGGAGICTTGTAAAACCTTCTTTTTACGTTTACTCTCGIGTTAAAAATCTGAATTTCTTCTAGAGTTCCTGATCTTC

120 130 140 150 160 170 180 190 200 210 220

Wild E TCGATTG

Vac E TCGATTG

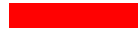

TGGICTAA

Wild E TGGICTAA

Vac E TGGICTAA

ATGGCAGATTCCAACGGTACTATTACCGTTGAAGAGCTTAAAAAGCTCCTTGAACAATGGAACCTAGTAATAGGTTTCCTATTCCTTACATGGATTGTGCTTCTACAATT  
10 20 30 40 50 60 70 80 90 100 110

Wild M ATGGCAGATTCCAACGGTACTATTACCGTTGAAGAGCTTAAAAAGCTCCTTGAACAATGGAACCTAGTAATAGGTTTCCTATTCCTTACATGGATTGTGCTTCTACAATT  
Vac M ATGGCAGATTCCAACGGTACTATTACCGTTGAAGAGCTTAAAAAGCTCCTTGAACAATGGAACCTAGTAATAGGTTTCCTATTCCTTACATGGATTGTGCTTCTACAATT

TGCCATATGCCAACAGGAATAGGTTTTTGTATATAAATTAAGTTAATTTTTCCCTCGGCTGTTATGGCCAGTAACTTTAGCTTGTFTTTGTGCTTTGCTGCTGTTACAGAATAA  
120 130 140 150 160 170 180 190 200 210 220

Wild M TGCCATATGCCAACAGGAATAGGTTTTTGTATATAAATTAAGTTAATTTTTCCCTCGGCTGTTATGGCCAGTAACTTTAGCTTGTFTTTGTGCTTTGCTGCTGTTACAGAATAA  
Vac M TGCCATATGCCAACAGGAATAGGTTTTTGTATATAAATTAAGTTAATTTTTCCCTCGGCTGTTATGGCCAGTAACTTTAGCTTGTFTTTGTGCTTTGCTGCTGTTACAGAATAA

ATTGGATCACCGGTGGAATTGCTATCGCAATGGCTTGTCTTGTAGGCTTGTATGTGGCTCAGCTACTTCATTTGCTTCTTTTCAGACTGTTTGGCGTACCGGTTCCATGTGG  
230 240 250 260 270 280 290 300 310 320 330

Wild M ATTGGATCACCGGTGGAATTGCTATCGCAATGGCTTGTCTTGTAGGCTTGTATGTGGCTCAGCTACTTCATTTGCTTCTTTTCAGACTGTTTGGCGTACCGGTTCCATGTGG  
Vac M ATTGGATCACCGGTGGAATTGCTATCGCAATGGCTTGTCTTGTAGGCTTGTATGTGGCTCAGCTACTTCATTTGCTTCTTTTCAGACTGTTTGGCGTACCGGTTCCATGTGG

TCATTC AATCCAGAACTAACATTTCTTCTCAACGIGCCACTCCATGGCACTATTTCTGACCAGACCGCTTCTAGAAAAGTGAACCTCGTAATCGGAGCTGTGATCCTTCGIGG  
340 350 360 370 380 390 400 410 420 430 440

Wild M TCATTC AATCCAGAACTAACATTTCTTCTCAACGIGCCACTCCATGGCACTATTTCTGACCAGACCGCTTCTAGAAAAGTGAACCTCGTAATCGGAGCTGTGATCCTTCGIGG  
Vac M TCATTC AATCCAGAACTAACATTTCTTCTCAACGIGCCACTCCATGGCACTATTTCTGACCAGACCGCTTCTAGAAAAGTGAACCTCGTAATCGGAGCTGTGATCCTTCGIGG

ACATCTTCGTATTGCTGGACACCATCTAGGACCGCTGTGACATCAAGGACCTGCC TAAAGAAAATCACTGTTGCTACATCACGAACGCTTTCTTATTATAAAATTGGGAGCTT  
450 460 470 480 490 500 510 520 530 540 550

Wild M ACATCTTCGTATTGCTGGACACCATCTAGGACCGCTGTGACATCAAGGACCTGCC TAAAGAAAATCACTGTTGCTACATCACGAACGCTTTCTTATTATAAAATTGGGAGCTT  
Vac M ACATCTTCGTATTGCTGGACACCATCTAGGACCGCTGTGACATCAAGGACCTGCC TAAAGAAAATCACTGTTGCTACATCACGAACGCTTTCTTATTATAAAATTGGGAGCTT

CGCAGCGTGTAGCAGGTGACTCAGGTTTTGCTGCATACAGTCGCTACAGGATTTGGCAACTATAAAATTAACACAGACCATTTCCAGTAGCAGTGACAATATTGCTTTGCTT  
560 570 580 590 600 610 620 630 640 650 660

Wild M CGCAGCGTGTAGCAGGTGACTCAGGTTTTGCTGCATACAGTCGCTACAGGATTTGGCAACTATAAAATTAACACAGACCATTTCCAGTAGCAGTGACAATATTGCTTTGCTT  
Vac M CGCAGCGTGTAGCAGGTGACTCAGGTTTTGCTGCATACAGTCGCTACAGGATTTGGCAACTATAAAATTAACACAGACCATTTCCAGTAGCAGTGACAATATTGCTTTGCTT

GTACAGTAA

Wild M GTACAGTAA  
Vac M GTACAGTAA

ATGTTTCATCTCGTTGACTTTCAGGTTACTATAGCAGAGATATTACTAATTATTATGAGGACTTTTAAAGTTTCCATTGGAATCTTGATTACATCATAAACCTCATAAT  
10 20 30 40 50 60 70 80 90 100 110

Wild ORF6 ATGTTTCATCTCGTTGACTTTCAGGTTACTATAGCAGAGATATTACTAATTATTATGAGGACTTTTAAAGTTTCCATTGGAATCTTGATTACATCATAAACCTCATAAT  
Vac ORF6 ATGTTTCATCTCGTTGACTTTCAGGTTACTATAGCAGAGATATTACTAATTATTATGAGGACTTTTAAAGTTTCCATTGGAATCTTGATTACATCATAAACCTCATAAT

TAAAAATTTATCTAAGTCACTAACTGAGAATAAATATTCTCAATTAGATGAAGAGCAACCAATGGAGATTGATTAA  
120 130 140 150 160 170 180

Wild ORF6 TAAAAATTTATCTAAGTCACTAACTGAGAATAAATATTCTCAATTAGATGAAGAGCAACCAATGGAGATTGATTAA  
Vac ORF6 TAAAAATTTATCTAAGTCACTAACTGAGAATAAATATTCTCAATTAGATGAAGAGCAACCAATGGAGATTGATTAA

ATGAAAATTATTCTTTTCTTGGCACTGATAACACTCGCTACTTGTGAGCTTTATCACTACCAAGAGTGTGTAGAGGTACAACAGTACTTTTAAAAGAACCTTGCTCTTC  
10 20 30 40 50 60 70 80 90 100 110

Wild ORF7a ATGAAAATTATTCTTTTCTTGGCACTGATAACACTCGCTACTTGTGAGCTTTATCACTACCAAGAGTGTGTAGAGGTACAACAGTACTTTTAAAAGAACCTTGCTCTTC

Vac ORF7a ATGAAAATTATTCTTTTCTTGGCACTGATAACACTCGCTACTTGTGAGCTTTATCACTACCAAGAGTGTGTAGAGGTACAACAGTACTTTTAAAAGAACCTTGCTCTTC

TGGAACATACGAGGGCAATTCACCAATTCATCCTCTAGCTGATAACAAATTTGCACCTGACTTTGCTTTAGCACTCAATTTGCTTTTGGCTTTGTCCTGACGGCGTAAAACACG  
120 130 140 150 160 170 180 190 200 210 220

Wild ORF7a TGGAACATACGAGGGCAATTCACCAATTCACCTCTAGCTGATAACAAATTTGCACCTGACTTTGCTTTAGCACTCAATTTGCTTTTGGCTTTGTCCTGACGGCGTAAAACACG

Vac ORF7a TGGAACATACGAGGGCAATTCACCAATTCATCCTCTAGCTGATAACAAATTTGCACCTGACTTTGCTTTAGCACTCAATTTGCTTTTGGCTTTGTCCTGACGGCGTAAAACACG

TCTATCAGTTACGTGCCAGATCAGTTTCACCTAAACTGTTTCATCAGACAAGAGGAAGTTCAAGAACTTTACTCTCCAATTTTCTTTATTTGTTGCGGCAATAGTGTTTATA  
230 240 250 260 270 280 290 300 310 320 330

Wild ORF7a TCTATCAGTTACGTGCCAGATCAGTTTCACCTAAACTGTTTCATCAGACAAGAGGAAGTTCAAGAACTTTACTCTCCAATTTTCTTTATTTGTTGCGGCAATAGTGTTTATA

Vac ORF7a TCTATCAGTTACGTGCCAGATCAGTTTCACCTAAACTGTTTCATCAGACAAGAGGAAGTTCAAGAACTTTACTCTCCAATTTTCTTTATTTGTTGCGGCAATAGTGTTTATA

ACACTTTGCTTTCACACTCAAAAAGAAAGACAGAAATGA  
340 350 360

Wild ORF7a ACACTTTGCTTTCACACTCAAAAAGAAAGACAGAAATGA

Vac ORF7a ACACTTTGCTTTCACACTCAAAAAGAAAGACAGAAATGA

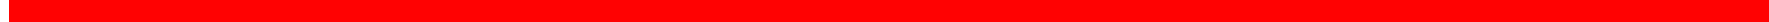

ATGATTGAACTTTCATTAATTGACTTCTATTTGIGCTTTTTAGCCTTTCIGCTATTCCTTGTTTTAAATTAATGCTTATTATCTTTTGGTTCTCACTTGAAC TGCAAGATCA  
10 20 30 40 50 60 70 80 90 100 110

Wild ORF7b ATGATTGAACTTTCATTAATTGACTTCTATTTGIGCTTTTTAGCCTTTCIGCTATTCCTTGTTTTAAATTAATGCTTATTATCTTTTGGTTCTCACTTGAAC TGCAAGATCA

Vac ORF7b ATGATTGAACTTTCATTAATTGACTTCTATTTGIGCTTTTTAGCCTTTCIGCTATTCCTTGTTTTAAATTAATGCTTATTATCTTTTGGTTCTCACTTGAAC TGCAAGATCA

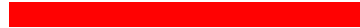

TAATGAAACTTGTACAGCCTAA  
120 130

Wild ORF7b TAATGAAACTTGTACAGCCTAA

Vac ORF7b TAATGAAACTTGTACAGCCTAA

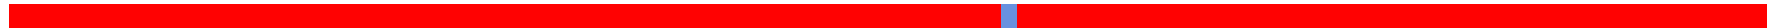

ATGAAATTTCTTGTGTTTTCTTAGGAATCATCACAACCTGTAGCTGCATTTACCCAAGAATGTAGTTTACAGTCATGFACTCAACATCAACCATATGTAGTTGATGACCCGTG  
 10 20 30 40 50 60 70 80 90 100 110

wild ORF8 ATGAAATTTCTTGTGTTTTCTTAGGAATCATCACAACCTGTAGCTGCATTTACCCAAGAATGTAGTTTACAGTCATGFACTCAACATCAACCATATGTAGTTGATGACCCGTG  
 Vac ORF8 ATGAAATTTCTTGTGTTTTCTTAGGAATCATCACAACCTGTAGCTGCATTTACCCAAGAATGTAGTTTACAGTCATGFACTCAACATCAACCATATGTAGTTGATGACCCGTG

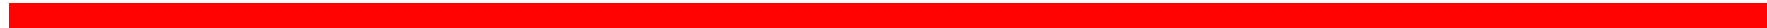

TCCTATTCACFTTCTATTTCTAAATGGTATATTAGAGTAGGAGCTAGAAAATCAGCACCTTTAATTGAATTGTGCGTGGATGAGGCTGGTTCTAAATCACCCATTCAGTACA  
 120 130 140 150 160 170 180 190 200 210 220

wild ORF8 TCCTATTCACFTTCTATTTCTAAATGGTATATTAGAGTAGGAGCTAGAAAATCAGCACCTTTAATTGAATTGTGCGTGGATGAGGCTGGTTCTAAATCACCCATTCAGTACA  
 Vac ORF8 TCCTATTCACFTTCTATTTCTAAATGGTATATTAGAGTAGGAGCTAGAAAATCAGCACCTTTAATTGAATTGTGCGTGGATGAGGCTGGTTCTAAATCACCCATTCAGTACA

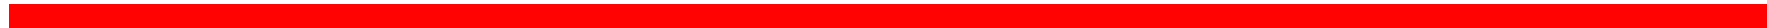

TCGATATCGGTAATTATACAGTTTCCGTTCACCTTTTACAATTAATTGCCAGGAACCTAAATTTGGGTAGTCTTGTAGTGCCTGTGTTCTATGAAGACTTTTTAGAG  
 230 240 250 260 270 280 290 300 310 320 330

wild ORF8 TCGATATCGGTAATTATACAGTTTCCGTTCACCTTTTACAATTAATTGCCAGGAACCTAAATTTGGGTAGTCTTGTAGTGCCTGTGTTCTATGAAGACTTTTTAGAG  
 Vac ORF8 TCGATATCGGTAATTATACAGTTTCCGTTCACCTTTTACAATTAATTGCCAGGAACCTAAATTTGGGTAGTCTTGTAGTGCCTGTGTTCTATGAAGACTTTTTAGAG

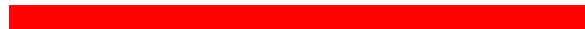

TATCATGACGTTTCGIGTTGTTTTAGATTTTCATCTAA  
 340 350 360

wild ORF8 TATCATGACGTTTCGIGTTGTTTTAGATTTTCATCTAA  
 Vac ORF8 TATCATGACGTTTCGIGTTGTTTTAGATTTTCATCTAA

ATGTC TGATAATGGACCCCAAATCAGCGAAATGCACCCCGCATTACGTTTGGTGGACCCTCAGATTCAACTGGCAGTAACCAGAATGGAGAACGCAGTGGGGCGCGATC  
10 20 30 40 50 60 70 80 90 100 110

Wild N ATGTC TGATAATGGACCCCAAATCAGCGAAATGCACCCCGCATTACGTTTGGTGGACCCTCAGATTCAACTGGCAGTAACCAGAATGGAGAACGCAGTGGGGCGCGATC  
Vac N ATGTC TGATAATGGACCCCAAATCAGCGAAATGCACCCCGCATTACGTTTGGTGGACCCTCAGATTCAACTGGCAGTAACCAGAATGGAGAACGCAGTGGGGCGCGATC

AAAACAACGTCGGCCCCAAGGTTTACCCAATAATACTGCGTCTTGGTTTACCCTCTCACTCAACATGGCAAGGAAGACCTTAAATTCCTTCGAGGACAAGGCGTTCCAA  
120 130 140 150 160 170 180 190 200 210 220

Wild N AAAACAACGTCGGCCCCAAGGTTTACCCAATAATACTGCGTCTTGGTTTACCCTCTCACTCAACATGGCAAGGAAGACCTTAAATTCCTTCGAGGACAAGGCGTTCCAA  
Vac N AAAACAACGTCGGCCCCAAGGTTTACCCAATAATACTGCGTCTTGGTTTACCCTCTCACTCAACATGGCAAGGAAGACCTTAAATTCCTTCGAGGACAAGGCGTTCCAA

TTAACACCAATAGCAGTCCAGATGACCAAATTTGGCTACTACCGAAGAGCTACCAGACGAATTCGTGGTGGTGACGGTAAAAATGAAAGATCTCAGTCCAAGATGGTATTTTC  
230 240 250 260 270 280 290 300 310 320 330

Wild N TTAACACCAATAGCAGTCCAGACGACCAAATTTGGCTACTACCGAAGAGCTACCAGACGAATTCGTGGTGGTGACGGTAAAAATGAAAGATCTCAGTCCAAGATGGTATTTTC  
Vac N TTAACACCAATAGCAGTCCAGATGACCAAATTTGGCTACTACCGAAGAGCTACCAGACGAATTCGTGGTGGTGACGGTAAAAATGAAAGATCTCAGTCCAAGATGGTATTTTC

TACTACCTAGGAACTGGGCCAGAAGCTGGACTTCCCTATGGTGTAAACAAAGACGGCATCATATGGGTTGCAACTGAGGGAGCCTTGAATACACCAAAGATCACATTGG  
340 350 360 370 380 390 400 410 420 430 440

Wild N TACTACCTAGGAACTGGGCCAGAAGCTGGACTTCCCTATGGTGTAAACAAAGACGGCATCATATGGGTTGCAACTGAGGGAGCCTTGAATACACCAAAGATCACATTGG  
Vac N TACTACCTAGGAACTGGGCCAGAAGCTGGACTTCCCTATGGTGTAAACAAAGACGGCATCATATGGGTTGCAACTGAGGGAGCCTTGAATACACCAAAGATCACATTGG

CACCCGCAATCCTGCTAACAAATGCTGCAATCGTGTACAACTTCCTCAAGGAACAACATTTGCCAAAAGGCTTCTACGCAGAAAGGAGCAGAGGCGGCAGTCAAGCCTCTTT  
450 460 470 480 490 500 510 520 530 540 550

Wild N CACCCGCAATCCTGCTAACAAATGCTGCAATCGTGTACAACTTCCTCAAGGAACAACATTTGCCAAAAGGCTTCTACGCAGAAAGGAGCAGAGGCGGCAGTCAAGCCTCTTT  
Vac N CACCCGCAATCCTGCTAACAAATGCTGCAATCGTGTACAACTTCCTCAAGGAACAACATTTGCCAAAAGGCTTCTACGCAGAAAGGAGCAGAGGCGGCAGTCAAGCCTCTTT

CTCGTTCCTCATCACGTAGTCGCAACAGTTCAAGAAATTCAACTCCAGGCAGCAGTAGGGGAACCTTCTCCTGCTAGAATGGCTGGCAATGGCGGTGATGCTGCTCTTGCT  
560 570 580 590 600 610 620 630 640 650 660

Wild N CTCGTTCCTCATCACGTAGTCGCAACAGTTCAAGAAATTCAACTCCAGGCAGCAGTAGGGGAACCTTCTCCTGCTAGAATGGCTGGCAATGGCGGTGATGCTGCTCTTGCT  
Vac N CTCGTTCCTCATCACGTAGTCGCAACAGTTCAAGAAATTCAACTCCAGGCAGCAGTAGGGGAACCTTCTCCTGCTAGAATGGCTGGCAATGGCGGTGATGCTGCTCTTGCT

TTGCTGCTGCTTTGACAGATTGAACCAGCTTGAGAGCAAAATGTTCTGGTAAAGGCCAACAAACAACAAGGCCAAAACCTGTCACTAAGAAATCTGCTGCTGAGGCTTCTAAGAA  
670 680 690 700 710 720 730 740 750 760 770

Wild N TTGCTGCTGCTTTGACAGATTGAACCAGCTTGAGAGCAAAATGTTCTGGTAAAGGCCAACAAACAACAAGGCCAAAACCTGTCACTAAGAAATCTGCTGCTGAGGCTTCTAAGAA  
Vac N TTGCTGCTGCTTTGACAGATTGAACCAGCTTGAGAGCAAAATGTTCTGGTAAAGGCCAACAAACAACAAGGCCAAAACCTGTCACTAAGAAATCTGCTGCTGAGGCTTCTAAGAA



GCCTCGGCAAAAACGTACTGCCACTAAAGCATAACAATGTAACACAAGCTTTTCGGCAGACGTTGGTCCAGAACAACCCAAGGAAATTTTGGGGACCAGGAACTAATCAGAC  
780 790 800 810 820 830 840 850 860 870 880

Wild N GCCTCGGCAAAAACGTACTGCCACTAAAGCATAACAATGTAACACAAGCTTTTCGGCAGACGTTGGTCCAGAACAACCCAAGGAAATTTTGGGGACCAGGAACTAATCAGAC  
Vac N GCCTCGGCAAAAACGTACTGCCACTAAAGCATAACAATGTAACACAAGCTTTTCGGCAGACGTTGGTCCAGAACAACCCAAGGAAATTTTGGGGACCAGGAACTAATCAGAC

AAGGAACTGATTACAAACATTTGGCCGCAAATTCACAAATTTGCCCCAGCGCTTCAGCGTTCCTTCGGAATGTCGCGCATTTGGCATGGAAGTCACACCTTCGGGAACGTGG  
890 900 910 920 930 940 950 960 970 980 990

Wild N AAGGAACTGATTACAAACATTTGGCCGCAAATTCACAAATTTGCCCCAGCGCTTCAGCGTTCCTTCGGAATGTCGCGCATTTGGCATGGAAGTCACACCTTCGGGAACGTGG  
Vac N AAGGAACTGATTACAAACATTTGGCCGCAAATTCACAAATTTGCCCCAGCGCTTCAGCGTTCCTTCGGAATGTCGCGCATTTGGCATGGAAGTCACACCTTCGGGAACGTGG

TTGACCTACACAGGTGCCATCAAATTTGGATGACAAAGATCCAAATTTCAAAGATCAAGTTCATTTTGTGAATAAGCATATTGACGCATACATAACATTTCCACCAACAGA  
1000 1010 1020 1030 1040 1050 1060 1070 1080 1090 1100

Wild N TTGACCTACACAGGTGCCATCAAATTTGGATGACAAAGATCCAAATTTCAAAGATCAAGTTCATTTTGTGAATAAGCATATTGACGCATACATAACATTTCCACCAACAGA  
Vac N TTGACCTACACAGGTGCCATCAAATTTGGATGACAAAGATCCAAATTTCAAAGATCAAGTTCATTTTGTGAATAAGCATATTGACGCATACAAAACATTTCCACCAACAGA

GCCTAAAAAGGACAAAAAGAAGAGGCTGATGAAACTCAAGCCTTACCGCAGAGACAGAAGAAACAGCAAACCTGTGACTCTTCTTCCTGCTGCAGATTTGGATGATTTCT  
1110 1120 1130 1140 1150 1160 1170 1180 1190 1200 1210

Wild N GCCTAAAAAGGACAAAAAGAAGAGGCTGATGAAACTCAAGCCTTACCGCAGAGACAGAAGAAACAGCAAACCTGTGACTCTTCTTCCTGCTGCAGATTTGGATGATTTCT  
Vac N GCCTAAAAAGGACAAAAAGAAGAGGCTGATGAAACTCAAGCCTTACCGCAGAGACAGAAGAAACAGCAAACCTGTGACTCTTCTTCCTGCTGCAGATTTGGATGATTTCT

CCAAACAATTTGCAACAATCCATGAGCAGTGTGACTCAACTCAGGCCTAA  
1220 1230 1240 1250 1260

Wild N CCAAACAATTTGCAACAATCCATGAGCAGTGTGACTCAACTCAGGCCTAA  
Vac N CCAAACAATTTGCAACAATCCATGAGCAGTGTGACTCAACTCAGGCCTAA

ATGGGGCTATATAAACGTTTTTCGCTTTTTCCGTTTACGATATATAGTCTACTCTTTGTCAGAAATGAATTCCTCGTAACTACATAGCACAAAGTAGATGTAGTTAACTTTAATCT  
10 20 30 40 50 60 70 80 90 100 110

Wild ORF10 ATGGGGCTATATAAACGTTTTTCGCTTTTTCCGTTTACGATATATAGTCTACTCTTTGTCAGAAATGAATTCCTCGTAACTACATAGCACAAAGTAGATGTAGTTAACTTTAATCT  
Vac ORF10 ATGGGGCTATATAAACGTTTTTCGCTTTTTCCGTTTACGATATATAGTCTACTCTTTGTCAGAAATGAATTCCTCGTAACTACATAGCACAAAGTAGATGTAGTTAACTTTAATCT

CACATAG

Wild ORF10 CACATAG  
Vac ORF10 CACATAG

**Fig. S10. Nucleotide alignment of cold-adapted live attenuated SARS-CoV-2 vaccine strain.** Full nucleotide sequences of cold-adapted live attenuated SARS-CoV-2 vaccine strain (CoV-2-CNUHV 03-CA22°C) were aligned with that of wild-type SARS-CoV-2 (CoV-2-CNUHV03) using DNASTAR Lasergene.

MESLVPGFNEKTHVOLSLPVLQVRDVLVRGFGDSVEEVLSEARQHLKDGTCGLVEVEKGVLPQLEQPYVFIKRSDARTAPHGHVWVVELVAELEGIOYGRSGETLGLVLPVH  
10 20 30 40 50 60 70 80 90 100 110

Wild ORFlab MESLVPGFNEKTHVOLSLPVLQVRDVLVRGFGDSVEEVLSEARQHLKDGTCGLVEVEKGVLPQLEQPYVFIKRSDARTAPHGHVWVVELVAELEGIOYGRSGETLGLVLPVH  
Vac ORFlab MESLVPGFNEKTHVOLSLPVLQVRDVLVRGFGDSVEEVLSEARQHLKDGTCGLVEVEKGVLPQLEQPYVFIKRSDARTAPH---VVELVAELEGIOYGRSGETLGLVLPVH

VGEIPVAYRKVLLRKNKNGKAGGHSYGADLKSFDLGDDELGTDPYEDFOENWNWIKHSSGVITRELMRELNGGAYTRYVDNMFVCGPDGYPLECTIKDLLARAGKASCTLSEQLD  
120 130 140 150 160 170 180 190 200 210 220

Wild ORFlab VGEIPVAYRKVLLRKNKNGKAGGHSYGADLKSFDLGDDELGTDPYEDFOENWNWIKHSSGVITRELMRELNGGAYTRYVDNMFVCGPDGYPLECTIKDLLARAGKASCTLSEQLD  
Vac ORFlab VGEIPVAYRKVLLRKNKNGKAGGHSYGADLKSFDLGDDELGTDPYEDFOENWNWIKHSSGVITRELMRELNGGAYTRYVDNMFVCGPDGYPLECTIKDLLARAGKASCTLSEQLD

FIDTKRGVYCCRGHEHEILAWYTERSEKSYELQTPFEIKLAKKFDTFNGECPNFVFPPLNSIIKTIQPRVEKKKLDGFMGRIRSVYPVASPNECNQMCLSTLMKCDHCGETS  
230 240 250 260 270 280 290 300 310 320 330

Wild ORFlab FIDTKRGVYCCRGHEHEILAWYTERSEKSYELQTPFEIKLAKKFDTFNGECPNFVFPPLNSIIKTIQPRVEKKKLDGFMGRIRSVYPVASPNECNQMCLSTLMKCDHCGETS  
Vac ORFlab FIDTKRGVYCCREHEHEILAWYTERSEKSYELQTPFEIKLAKKFDTFNGECPNFVFPPLNSIIKTIQPRVEKKKLDGFMGRIRSVYPVASPNECNQMCLSTLMKCDHCGETS

WQTGDFVKATCFEFCGTENLTKEGATTCGYLPQNAVVKIYCPACHNSEVGPESHSLAEYHNEISGLKTIILRKGGRTIAFGGCVFSYVVGCHNKAYWVPRASANIGCNHTIGVVG  
340 350 360 370 380 390 400 410 420 430 440

Wild ORFlab WQTGDFVKATCFEFCGTENLTKEGATTCGYLPQNAVVKIYCPACHNSEVGPESHSLAEYHNEISGLKTIILRKGGRTIAFGGCVFSYVVGCHNKAYWVPRASANIGCNHTIGVVG  
Vac ORFlab WQTGDFVKATCFEFCGTENLTKEGATTCGYLPQNAVVKIYCPACHNSEVGPESHSLAEYHNEISGLKTIILRKGGRTIAFGGCVFSYVVGCHNKAYWVPRASANIGCNHTIGVVG

EGSEGLNDNLLLEILOKEKVNINIVGDFKLNNEEIAIILASFSASTSFAFVEIVKGLDYKAFKQIVESCNGFVKIKGKAKKGAWNIGEOKSILSPLYAFASEAARVVRISIFSR  
450 460 470 480 490 500 510 520 530 540 550

Wild ORFlab EGSEGLNDNLLLEILOKEKVNINIVGDFKLNNEEIAIILASFSASTSFAFVEIVKGLDYKAFKQIVESCNGFVKIKGKAKKGAWNIGEOKSILSPLYAFASEAARVVRISIFSR  
Vac ORFlab EGSEGLNDNLLLEILOKEKVNINIVGDFKLNNEEIAIILASFSASTSFAFVEIVKGLDYKAFKQIVESCNGFVKIKGKAKKGAWNIGEOKSILSPLYAFASEAARVVRISIFSR

TLETAQNSVRVLQKAAITILDGISOYSLRLIDAMMFTSDLATNNLVVMAYITGGVVQLTSQWLINIFGIVYEKLPVLDWLEEKFKEGVEFLRDGWEIVKFLSTCACEIV  
560 570 580 590 600 610 620 630 640 650 660

Wild ORFlab TLETAQNSVRVLQKAAITILDGISOYSLRLIDAMMFTSDLATNNLVVMAYITGGVVQLTSQWLINIFGIVYEKLPVLDWLEEKFKEGVEFLRDGWEIVKFLSTCACEIV  
Vac ORFlab TLETAQNSVRVLQKAAITILDGISOYSLRLIDAMMFTSDLATNNLVVMAYITGGVVQLTSQWLINIFGIVYEKLPVLDWLEEKFKEGVEFLRDGWEIVKFLSTCACEIV

GGQIVTCAKEIKESVQTFKLVNKFALCADSIIIGGAKLKALNLGETFVTHSKGLYRKC VKSREETGLIMPLKAPKEIIFLEGETLPTEVLTTEEVLKTDGLOPLEOPT  
670 680 690 700 710 720 730 740 750 760 770

Wild ORFlab GGQIVTCAKEIKESVQTFKLVNKFALCADSIIIGGAKLKALNLGETFVTHSKGLYRKC VKSREETGLIMPLKAPKEIIFLEGETLPTEVLTTEEVLKTDGLOPLEOPT  
Vac ORFlab GGQIVTCAKEIKESVQTFKLVNKFALCADSIIIGGAKLKALNLGETFVTHSKGLYRKC VKSREETGLIMPLKAPKEIIFLEGETLPTEVLTTEEVLKTDGLOPLEOPT

SEAVEAPLVGTPVCINGLMLEIKDTEKYCALAPNMMV~~TNNFTL~~KGGAPTKVIFGDDIVIEVQGYKSVNITFELDERIDKVLNEKCSAYTVELGTEVNEFACVVADAVI  
780 790 800 810 820 830 840 850 860 870 880

Wild ORF1ab SEAVEAPLVGTPVCINGLMLEIKDTEKYCALAPNMMV~~TNNFTL~~KGGAPTKVIFGDDIVIEVQGYKSVNITFELDERIDKVLNEKCSAYTVELGTEVNEFACVVADAVI  
Vac ORF1ab SEAVEAPLVGTPVCINGLMLEIKDTEKYCALAPNMMV~~TNNFTL~~KGGAPTKVIFGDDIVIEVQGYKSVNITFELDERIDKVLNEKCSAYTVELGTEVNEFACVVADAVI

KTLQPVSELLTPLGIDLDEWSMATYYLFD~~ESGEF~~KLASHMYCSFYPPDEDEEEGDC~~EEEEFF~~EPSTQY~~EYGT~~EDDYQ~~GKPLE~~FGATSAAALQPEEEQEEDWLDDDSQQIVGQ  
890 900 910 920 930 940 950 960 970 980 990

Wild ORF1ab KTLQPVSELLTPLGIDLDEWSMATYYLFD~~ESGEF~~KLASHMYCSFYPPDEDEEEGDC~~EEEEFF~~EPSTQY~~EYGT~~EDDYQ~~GKPLE~~FGATSAAALQPEEEQEEDWLDDDSQQIVGQ  
Vac ORF1ab KTLQPVSELLTPLGIDLDEWSMATYYLFD~~ESGEF~~KLASHMYCSFYPPDEDEEEGDC~~EEEEFF~~EPSTQY~~EYGT~~EDDYQ~~GKPLE~~FGATSAAALQPEEEQEEDWLDDDSQQIVGQ

QDGS~~EDNQT~~TTTIQTIVEVQ~~PQ~~LEMELTPV~~VQT~~IEVNSFSGYLKLTDNVYIKNADIVEEAKKVKPTVVVNAANVYLKHGGGVAGALNKATNNAMQVESDDYIATNGPLKVG  
1000 1010 1020 1030 1040 1050 1060 1070 1080 1090 1100

Wild ORF1ab QDGS~~EDNQT~~TTTIQTIVEVQ~~PQ~~LEMELTPV~~VQT~~IEVNSFSGYLKLTDNVYIKNADIVEEAKKVKPTVVVNAANVYLKHGGGVAGALNKATNNAMQVESDDYIATNGPLKVG  
Vac ORF1ab QDGS~~EDNQT~~TTTIQTIVEVQ~~PQ~~LEMELTPV~~VQT~~IEVNSFSGYLKLTDNVYIKNADIVEEAKKVKPTVVVNAANVYLKHGGGVAGALNKATNNAMQVESDDYIATNGPLKVG

GSCVLSGHNLAKHCLHVVGPNNV~~NGEDIQ~~LLKSAYENFNQHEVLLAPLLSAGIFGADPIHSLRVCVDIVRINNVYLAVFDKNLYDKLVSSFLEMKSEKQVEQKIAEIPKEE  
1110 1120 1130 1140 1150 1160 1170 1180 1190 1200 1210

Wild ORF1ab GSCVLSGHNLAKHCLHVVGPNNV~~NGEDIQ~~LLKSAYENFNQHEVLLAPLLSAGIFGADPIHSLRVCVDIVRINNVYLAVFDKNLYDKLVSSFLEMKSEKQVEQKIAEIPKEE  
Vac ORF1ab GSCVLSGHNLAKHCLHVVGPNNV~~NGEDIQ~~LLKSAYENFNQHEVLLAPLLSAGIFGADPIHSLRVCVDIVRINNVYLAVFDKNLYDKLVSSFLEMKSEKQVEQKIAEIPKEE

VKPFITESKPSVEQRKQDDKKIKACVEEV~~TTTLEET~~KFLTENLLLYIDINGNLHPDSATLVSDIDITFLK~~KDAPY~~IVGDVVOEGVLTAVWIPTKKAGGITTEMLAKALRKV  
1220 1230 1240 1250 1260 1270 1280 1290 1300 1310 1320

Wild ORF1ab VKPFITESKPSVEQRKQDDKKIKACVEEV~~TTTLEET~~KFLTENLLLYIDINGNLHPDSATLVSDIDITFLK~~KDAPY~~IVGDVVOEGVLTAVWIPTKKAGGITTEMLAKALRKV  
Vac ORF1ab VKPFITESKPSVEQRKQDDKKIKACVEEV~~TTTLEET~~KFLTENLLLYIDINGNLHPDSATLVSDIDITFLK~~KDAPY~~IVGDVVOEGVLTAVWIPTKKAGGITTEMLAKALRKV

PTDNYIT~~TTYPG~~QGLNGYTV~~E~~EAKTVLKKCKSAFYILPSIISNEKQEILGTVSWNLREMLAHAE~~E~~TRKLMFVCVETKAI~~V~~STIQ~~R~~KYKGIKIQEGVVDYGARFYFYTSKIT  
1330 1340 1350 1360 1370 1380 1390 1400 1410 1420 1430

Wild ORF1ab PTDNYIT~~TTYPG~~QGLNGYTV~~E~~EAKTVLKKCKSAFYILPSIISNEKQEILGTVSWNLREMLAHAE~~E~~TRKLMFVCVETKAI~~V~~STIQ~~R~~KYKGIKIQEGVVDYGARFYFYTSKIT  
Vac ORF1ab PTDNYIT~~TTYPG~~QGLNGYTV~~E~~EAKTVLKKCKSAFYILPSIISNEKQEILGTVSWNLREMLAHAE~~E~~TRKLMFVCVETKAI~~V~~STIQ~~R~~KYKGIKIQEGVVDYGARFYFYTSKIT

VASLINTLNDLNETLVIMPLGYVTHGLNLEEAARYM~~RS~~LKVPATVSVSSPD~~AVTAY~~NGYLTSSSKTPEEHFIE~~T~~ISLAGSYK~~D~~WSYSGQSTQLGIEFLKRGDKSVYYTSN  
1440 1450 1460 1470 1480 1490 1500 1510 1520 1530 1540

Wild ORF1ab VASLINTLNDLNETLVIMPLGYVTHGLNLEEAARYM~~RS~~LKVPATVSVSSPD~~AVTAY~~NGYLTSSSKTPEEHFIE~~T~~ISLAGSYK~~D~~WSYSGQSTQLGIEFLKRGDKSVYYTSN  
Vac ORF1ab VASLINTLNDLNETLVIMPLGYVTHGLNLEEAARYM~~RS~~LKVPATVSVSSPD~~AVTAY~~NGYLTSSSKTPEEHFIE~~T~~ISLAGSYK~~D~~WSYSGQSTQLGIEFLKRGDKSVYYTSN

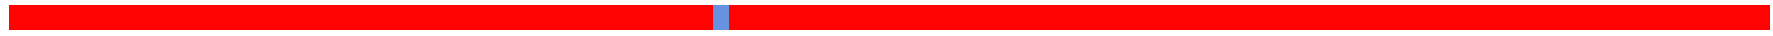

PTTFHLDGEVITFDNLKTLTLLSLREVVRTIKVFTTVDNINLHTQVVGMSTFYGOQFGPTYFDGADVTKIKPHNSHEGKTFYVLPNDLTLRVEAFEYHYHTDPSFLGRYMSAL  
 1550 1560 1570 1580 1590 1600 1610 1620 1630 1640 1650

Wild ORFlab PTTFHLDGEVITFDNLKTLTLLSLREVVRTIKVFTTVDNINLHTQVVGMSTFYGOQFGPTYFDGADVTKIKPHNSHEGKTFYVLPNDLTLRVEAFEYHYHTDPSFLGRYMSAL  
 Vac ORFlab PTTFHLDGEVITFDNLKTLTLLSLREVVRTIKVFTTVDNINLHTQVVDMSTFYGOQFGPTYFDGADVTKIKPHNSHEGKTFYVLPNDLTLRVEAFEYHYHTDPSFLGRYMSAL

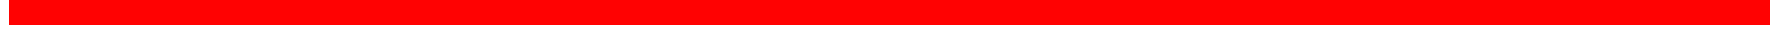

NHTKKWKYPQVNGLTSLKWADNNCYLATALLTLOQIELKFNPPALQDAYRARAGEAANFCALILAYCNKTVGELGDVRETIMSYLFOHANLDSCKRVLNVVCKTCGQQQT  
 1660 1670 1680 1690 1700 1710 1720 1730 1740 1750 1760

Wild ORFlab NHTKKWKYPQVNGLTSLKWADNNCYLATALLTLOQIELKFNPPALQDAYRARAGEAANFCALILAYCNKTVGELGDVRETIMSYLFOHANLDSCKRVLNVVCKTCGQQQT  
 Vac ORFlab NHTKKWKYPQVNGLTSLKWADNNCYLATALLTLOQIELKFNPPALQDAYRARAGEAANFCALILAYCNKTVGELGDVRETIMSYLFOHANLDSCKRVLNVVCKTCGQQQT

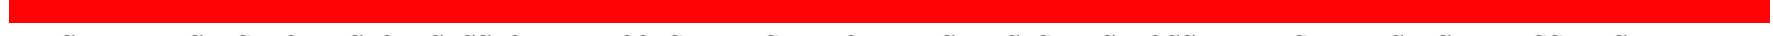

TLKGVEAVMYMGTILSYEQFKKGVQIPCTCGKQATKYLVOQESPFVMSAPPAQYELKHGTFTCASEYTGNYQCGHYKHITSKETLYCIDGALLTKSSEYKGPITDVFYKE  
 1770 1780 1790 1800 1810 1820 1830 1840 1850 1860 1870

Wild ORFlab TLKGVEAVMYMGTILSYEQFKKGVQIPCTCGKQATKYLVOQESPFVMSAPPAQYELKHGTFTCASEYTGNYQCGHYKHITSKETLYCIDGALLTKSSEYKGPITDVFYKE  
 Vac ORFlab TLKGVEAVMYMGTILSYEQFKKGVQIPCTCGKQATKYLVOQESPFVMSAPPAQYELKHGTFTCASEYTGNYQCGHYKHITSKETLYCIDGALLTKSSEYKGPITDVFYKE

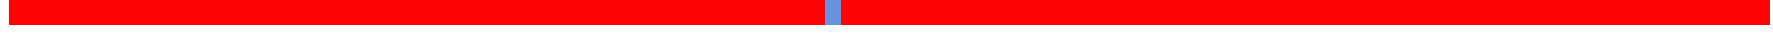

NSYTTTTIKPVTYKLDGVVCTEIDPKLDNYKKDNSYFTEQPIDLVPNQYPSASFDFNFKFCVCDNIKFAADDLNQLTGYYKPPASRELKVITFFPDLNGDVVAIDYKHYTPSFK  
 1880 1890 1900 1910 1920 1930 1940 1950 1960 1970 1980

Wild ORFlab NSYTTTTIKPVTYKLDGVVCTEIDPKLDNYKKDNSYFTEQPIDLVPNQYPSASFDFNFKFCVCDNIKFAADDLNQLTGYYKPPASRELKVITFFPDLNGDVVAIDYKHYTPSFK  
 Vac ORFlab NSYTTTTIKPVTYKLDGVVCTEIDPKLDNYKKDNSYFTEQPIDLVPNQYPNASFDFNFKFCVCDNIKFAADDLNQLTGYYKPPASRELKVITFFPDLNGDVVAIDYKHYTPSFK

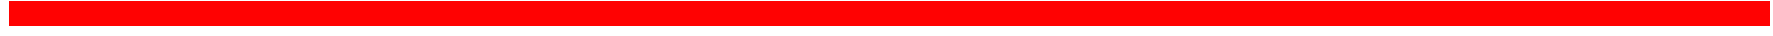

KGAKLLHKPIVWHVNNATNKATYKPNIWCI RCLWSTKPVETSNSFDVLKSEDAQGMNDLACEDLKPVSEEVVENPTIQKDVLECNVKTTEVVGDIILKPANNSLKITTEEV  
 1990 2000 2010 2020 2030 2040 2050 2060 2070 2080 2090

Wild ORFlab KGAKLLHKPIVWHVNNATNKATYKPNIWCI RCLWSTKPVETSNSFDVLKSEDAQGMNDLACEDLKPVSEEVVENPTIQKDVLECNVKTTEVVGDIILKPANNSLKITTEEV  
 Vac ORFlab KGAKLLHKPIVWHVNNATNKATYKPNIWCI RCLWSTKPVETSNSFDVLKSEDAQGMNDLACEDLKPVSEEVVENPTIQKDVLECNVKTTEVVGDIILKPANNSLKITTEEV

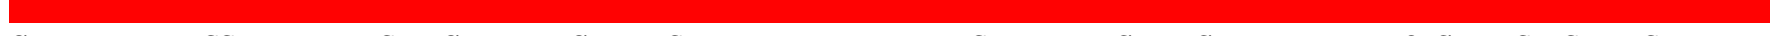

GHTDLMAAYVDNSSLTIKKPNELSRVLGLKTLATHGLAAVNSVPWDTIANYAKPFLNKVVSTTINIVTRCLNRCVINYMPYFFTLILLQLCTFTRSTNSRIKASMPPTIAK  
 2100 2110 2120 2130 2140 2150 2160 2170 2180 2190 2200

Wild ORFlab GHTDLMAAYVDNSSLTIKKPNELSRVLGLKTLATHGLAAVNSVPWDTIANYAKPFLNKVVSTTINIVTRCLNRCVINYMPYFFTLILLQLCTFTRSTNSRIKASMPPTIAK  
 Vac ORFlab GHTDLMAAYVDNSSLTIKKPNELSRVLGLKTLATHGLAAVNSVPWDTIANYAKPFLNKVVSTTINIVTRCLNRCVINYMPYFFTLILLQLCTFTRSTNSRIKASMPPTIAK

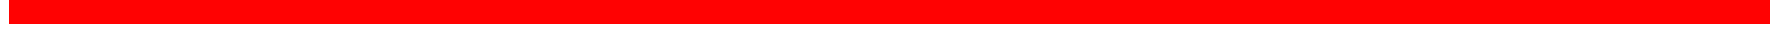

NIVKSVGKFCLEASFNYLKSPNFSKLNII IWFLLLSVCLGSLIYSTAALGVMSNLGMPSYCTGYREGYLNSTINVTIATYCTGSIPCSVCLSGLDSLDTYPSLETTQIT  
 2210 2220 2230 2240 2250 2260 2270 2280 2290 2300 2310

Wild ORFlab NIVKSVGKFCLEASFNYLKSPNFSKLNII IWFLLLSVCLGSLIYSTAALGVMSNLGMPSYCTGYREGYLNSTINVTIATYCTGSIPCSVCLSGLDSLDTYPSLETTQIT  
 Vac ORFlab NIVKSVGKFCLEASFNYLKSPNFSKLNII IWFLLLSVCLGSLIYSTAALGVMSNLGMPSYCTGYREGYLNSTINVTIATYCTGSIPCSVCLSGLDSLDTYPSLETTQIT

ISSFKWDLTAFGLVAEWFLAYILFTRFFVYVGLAAIMQLFFSYFAVHFISNSWLMWLIINLAQMAPISAMVRMYIFFASFYYVWKSYPVHVVDGCNSSTCMCYKRNRATR  
2320 2330 2340 2350 2360 2370 2380 2390 2400 2410 2420

Wild ORFlab ISSFKWDLTAFGLVAEWFLAYILFTRFFVYVGLAAIMQLFFSYFAVHFISNSWLMWLIINLAQMAPISAMVRMYIFFASFYYVWKSYPVHVVDGCNSSTCMCYKRNRATR  
Vac ORFlab ISSFKWDLTAFGLVAEWFLAYILFTRFFVYVGLAAIMQLFFSYFAVHFISNSWLMWLIINLVQMAPISAMVRMYIFFASFYYVWKSYPVHVVDGCNSSTCMCYKRNRATR

VECTTIVNGVRRSFYVYANGGKGFCKLHNWNCVNCDTFCAGSTFISDEVARDLSTLOFKRPIPNTDQSSYIVDSVIVKNGSIHLYFDKAGQKTYERHSLSHFVNLDNLRAN  
2430 2440 2450 2460 2470 2480 2490 2500 2510 2520 2530

Wild ORFlab VECTTIVNGVRRSFYVYANGGKGFCKLHNWNCVNCDTFCAGSTFISDEVARDLSTLOFKRPIPNTDQSSYIVDSVIVKNGSIHLYFDKAGQKTYERHSLSHFVNLDNLRAN  
Vac ORFlab VECTTIVNGVRRSFYVYANGGKGFCKLHNWNCVNCDTFCAGSTFISDEVARDLSTLOFKRPIPNTDQSSYIVDSVIVKNGSIHLYFDKAGQKTYERHSLSHFVNLDNLRAN

NTKGSLPINVIVFDGKSKCEESSAKSASVYYSQIMCQPIILLLDQALVSDVGDSEAVAVKMFDAYVNTFSSTFNVMEKLIKTLVATAEAEELAKNVSLDNVLSSTFISAARQG  
2540 2550 2560 2570 2580 2590 2600 2610 2620 2630 2640

Wild ORFlab NTKGSLPINVIVFDGKSKCEESSAKSASVYYSQIMCQPIILLLDQALVSDVGDSEAVAVKMFDAYVNTFSSTFNVMEKLIKTLVATAEAEELAKNVSLDNVLSSTFISAARQG  
Vac ORFlab NTKGSLPINVIVFDGKSKCEESSAKSASVYYSQIMCQPIILLLDQALVSDVGDSEAVAVKMFDAYVNTFSSTFNVMEKLIKTLVATAEAEELAKNVSLDNVLSSTFISAARQG

FVDSVETKDVVECLKLSHQSDIEVTGDCSNNYMLTYNKVENMTPRDLGACIDCSARHINAQVAKSHNIALIWNVKDFMSLSEQLRKQIRSAAKKNLPPFKLTCATTRQV  
2650 2660 2670 2680 2690 2700 2710 2720 2730 2740 2750

Wild ORFlab FVDSVETKDVVECLKLSHQSDIEVTGDCSNNYMLTYNKVENMTPRDLGACIDCSARHINAQVAKSHNIALIWNVKDFMSLSEQLRKQIRSAAKKNLPPFKLTCATTRQV  
Vac ORFlab FVDSVETKDVVECLKLSHQSDIEVTGDCSNNYMLTYNKVENMTPRDLGACIDCSARHINAQVAKSHNIALIWNVKDFMSLSEQLRKQIRSAAKKNLPPFKLTCATTRQV

VNAVITKIALKGGKIVNNWLKOLIKVTLVFLFVAALFYLLTPVHVMSKHIDFSSEIIGYKAIDGGVTRDIASTDTICFANKHADFDTWFSQRGGSYTNDKACPLIAAVITR  
2760 2770 2780 2790 2800 2810 2820 2830 2840 2850 2860

Wild ORFlab VNAVITKIALKGGKIVNNWLKOLIKVTLVFLFVAALFYLLTPVHVMSKHIDFSSEIIGYKAIDGGVTRDIASTDTICFANKHADFDTWFSQRGGSYTNDKACPLIAAVITR  
Vac ORFlab VNAVITKIALKGGKIVNNWLKOLIKVTLVFLFVAALFYLLTPVHVMSKHIDFSSEIIGYKAIDGGVTRDIASTDTICFANKHADFDTWFSQRGGSYTNDKACPLIAAVITR

EVGFVVPGLPGTILRTTNGDFLHFLPRVFSAVGNICYTPSKLIEYTDFAVSACVLAECTIFKDASGKPVPCYDITNVLEGSVAYESLRPDTRYVLMDGSLIQFPNTYLE  
2870 2880 2890 2900 2910 2920 2930 2940 2950 2960 2970

Wild ORFlab EVGFVVPGLPGTILRTTNGDFLHFLPRVFSAVGNICYTPSKLIEYTDFAVSACVLAECTIFKDASGKPVPCYDITNVLEGSVAYESLRPDTRYVLMDGSLIQFPNTYLE  
Vac ORFlab EVGFVVPGLPGTILRTTNGDFLHFLPRVFSAVGNICYTPSKLIEYTDFAVSACVLAECTIFKDASGKPVPCYDITNVLEGSVAYESLRPDTRYVLMDGSLIQFPNTYLE

GSVRVVTTFDSEYCGHGICERSEAGVCVSTSGRWLNNDYRSLPGVFCGVDAVNLLTNMFTPLIQPIGALDISASIVAGGIVAVITCLAYYFMRFRRAFGEYSHVAF  
2980 2990 3000 3010 3020 3030 3040 3050 3060 3070 3080

Wild ORFlab GSVRVVTTTFDSEYCGHGICERSEAGVCVSTSGRWLNNDYRSLPGVFCGVDAVNLLTNMFTPLIQPIGALDISASIVAGGIVAVITCLAYYFMRFRRAFGEYSHVAF  
Vac ORFlab GSVRVVTTTFDSEYCRHGICERSEAGVCVSTSGRWLNNDYRSLPGVFCGVDAVNLLTNMFTPLIQPIGALDISASIVAGGIVAVITCLAYYFMRFRRAFGEYSHVAF

N T L L F T M S F T V L C L T P V Y S F L P G V Y S V I Y L Y L T F Y L T N D V S F L A H I Q W M V M F T P L V P F W I T I A Y I I C I S T K H F Y W F F S N Y L K R R V V F N G V S F S T F F E E A A L C T F L L N K E M Y  
3090 3100 3110 3120 3130 3140 3150 3160 3170 3180 3190

Wild ORF1ab N T L L F T M S F T V L C L T P V Y S F L P G V Y S V I Y L Y L T F Y L T N D V S F L A H I Q W M V M F T P L V P F W I T I A Y I I C I S T K H F Y W F F S N Y L K R R V V F N G V S F S T F F E E A A L C T F L L N K E M Y  
Vac ORF1ab N T L L F T M S F T V L C L T P V Y S F L P G V Y S V I Y L Y L T F Y L T N D V S F L A H I Q W M V M F T P L V P F W I T I A Y I I C I S T K H F Y W F F S N Y L K R R V V F N G V S F S T F F E E A A L C T F L L N K E M Y

L K L R S D V L L P L T Q Y N R Y L A L Y N K Y K Y F S G A M D T T S Y R E A A C C H L A K A L N D F S N S G S D V L Y Q P P Q T S I T S A V L Q S G F R K M A F P S G K V E G C M V Q V T C G T T T L N G L W L D D V V Y  
3200 3210 3220 3230 3240 3250 3260 3270 3280 3290 3300

Wild ORF1ab L K L R S D V L L P L T Q Y N R Y L A L Y N K Y K Y F S G A M D T T S Y R E A A C C H L A K A L N D F S N S G S D V L Y Q P P Q T S I T S A V L Q S G F R K M A F P S G K V E G C M V Q V T C G T T T L N G L W L D D V V Y  
Vac ORF1ab L K L R S D V L L P L T Q Y N R Y L A L Y N K Y K Y F S G A M D T T S Y R E A A C C H L A K A L N D F S N S G S D V L Y Q P P Q T S I T S A V L Q S G F R K M A F P S G K V E G C M V Q V T C G T T T L N G L W L D D V V Y

C P R H V I C T S E D M L N P N Y E D L L I R K S N H N F L V Q A G N V Q L R V I G H S M Q N C V L K L K V D T A N P K T P K Y K F V R I Q P G Q T F S V L A C Y N G S P S G V Y Q C A M R P N F T I K G S F L N G S C G S  
3310 3320 3330 3340 3350 3360 3370 3380 3390 3400 3410

Wild ORF1ab C P R H V I C T S E D M L N P N Y E D L L I R K S N H N F L V Q A G N V Q L R V I G H S M Q N C V L K L K V D T A N P K T P K Y K F V R I Q P G Q T F S V L A C Y N G S P S G V Y Q C A M R P N F T I K G S F L N G S C G S  
Vac ORF1ab C P R H V I C T S E D M L N P N Y E D L L I R K S N H N F L V Q A G N V Q L R V I G H S M Q N C V L K L K V D T A N P K T P K Y K F V R I Q P G Q T F S V L A C Y N G S P S G V Y Q C A M R P N F T I K G S F L N G S C G S

V G F N I D Y D C V S F C Y M H H M E L P T G V H A G T D L E G N F Y G P F V D R Q T A Q A A G I D T T T V N V L A W L Y A A V I N G D R W F L N R F T T T L N D F N L V A M K Y N Y E P L T Q D H V D I L G P L S A Q T  
3420 3430 3440 3450 3460 3470 3480 3490 3500 3510 3520

Wild ORF1ab V G F N I D Y D C V S F C Y M H H M E L P T G V H A G T D L E G N F Y G P F V D R Q T A Q A A G I D T T T V N V L A W L Y A A V I N G D R W F L N R F T T T L N D F N L V A M K Y N Y E P L T Q D H V D I L G P L S A Q T  
Vac ORF1ab V G F N I D Y D C V S F C Y M H H M E L P T G V H A G T D L E G N F Y G P F V D R Q T A Q A A G I D T T T V N V L A W L Y A A V I N G D R W F L N R F T T T L N D F N L V A M K Y N Y E P L T Q D H V D I L G P L S A Q T

G I A V L D M C A S L K E L L Q N G M N G R T I L G S A L L E D E F T P F D V V R Q C S G V T F Q S A V K R T I K G T H H W L L L T I L T S L L V L V Q S T Q W S L F F F Y E N A F L P F A M G I I A M S A F A M M F V K  
3530 3540 3550 3560 3570 3580 3590 3600 3610 3620 3630

Wild ORF1ab G I A V L D M C A S L K E L L Q N G M N G R T I L G S A L L E D E F T P F D V V R Q C S G V T F Q S A V K R T I K G T H H W L L L T I L T S L L V L V Q S T Q W S L F F F Y E N A F L P F A M G I I A M S A F A M M F V K  
Vac ORF1ab G I A V L D M C A S L K E L L Q N G M N G R T I L G S A L L E D E F T P F D V V R Q C S G V T F Q S A V K R T I K G T H H W L L L T I L T S L L V L V Q S T Q W S L F F F Y E K A F L P F A M G I I A M S A F A M M F V K

H K H A F L C L F L L P S L A T V A Y F N M V Y M P A S W M R I M I W L D M V I T S L S G F K L K D C V M Y A S A V V L L I L M T A R T V Y D D G A R R V W I L M N V L T L V Y K V Y Y G N A L D Q A I S M W A L I I S V  
3640 3650 3660 3670 3680 3690 3700 3710 3720 3730 3740

Wild ORF1ab H K H A F L C L F L L P S L A T V A Y F N M V Y M P A S W M R I M I W L D M V I T S L S G F K L K D C V M Y A S A V V L L I L M T A R T V Y D D G A R R V W I L M N V L T L V Y K V Y Y G N A L D Q A I S M W A L I I S V  
Vac ORF1ab H K H A F L C L F L L P S L A T V A Y F N M V Y M P A S W M R I M I W L D M V I T S L S G F K L K D C V M Y A S A V V L L I L M T A R T V Y D D G A R R V W I L M N V L T L V Y K V Y Y G N A L D Q A I S M W A L I I S V

T S N Y S G V V T I V M F L A R G I V F M C V E Y C P I F F T I G N T L Q C I M L V Y C F L G Y F C T C Y F G L F C L L N R Y F R L T L G V Y D Y L V S T Q E F R Y M N S O G L I P P K N S I D A F K L N I K L I L G V G G K  
3750 3760 3770 3780 3790 3800 3810 3820 3830 3840 3850

Wild ORF1ab T S N Y S G V V T I V M F L A R G I V F M C V E Y C P I F F T I G N T L Q C I M L V Y C F L G Y F C T C Y F G L F C L L N R Y F R L T L G V Y D Y L V S T Q E F R Y M N S O G L I P P K N S I D A F K L N I K L I L G V G G K  
Vac ORF1ab T S N Y S G V V T I V M F L A R G I V F M C V E Y C P I F F T I G N T L Q C I M L V Y C F L G Y F C T C Y F G L F C L L N R Y F R L T L G V Y D Y L V S T Q E F R Y M N S O G L I P P K N S I D A F K L N I K L I L G V G G K

PCIKVATVQSKMSDVKCTSVVLLSVLQQLRVSESSSKLWAQCQVQLHNDILLAKDTTEAFEKVMVSLLSVLLSMOGAVAINKLCEEMLDNRATLQATASEFSSSLPSYAAFATA  
3860 3870 3880 3890 3900 3910 3920 3930 3940 3950 3960

Wild ORF1ab PCIKVATVQSKMSDVKCTSVVLLSVLQQLRVSESSSKLWAQCQVQLHNDILLAKDTTEAFEKVMVSLLSVLLSMOGAVDINKLCEEMLDNRATLQATASEFSSSLPSYAAFATA  
Vac ORF1ab PCIKVATVQSKMSDVKCTSVVLLSVLQQLRVSESSSKLWAQCQVQLHNDILLAKDTTEAFEKVMVSLLSVLLSMOGAVAINKLCEEMLDNRATLQATASEFSSSLPSYAAFATA

QEAYEQAVANGDSEVVLKLLKSLNVAKSEFDRDAAMORKLEKMDQAMTQMYKQARSEDKRAKVT'SAMQIMLF\*IMLRKLDNDALNNIINNARDGCVPLNIIPLIITTAAKL  
3970 3980 3990 4000 4010 4020 4030 4040 4050 4060 4070

Wild ORF1ab QEAYEQAVANGDSEVVLKLLKSLNVAKSEFDRDAAMORKLEKMDQAMTQMYKQARSEDKRAKVT'SAMQIMLF\*IMLRKLDNDALNNIINNARDGCVPLNIIPLIITTAAKL  
Vac ORF1ab QEAYEQAVANGDSEVVLKLLKSLNVAKSEFDRDAAMORKLEKMDQAMTQMYKQARSEDKRAKVT'SAMQIMLF\*IMLRKLDNDALNNIINNARDGCVPLNIIPLIITTAAKL

MVVIPDYNITYKNITCDGITFTYASALWEIQQVVDADSKIVQLSEISMDNSPNLAWPLIVTALRANSVAVKLQNNELSPVALRQMSCAAGITQTACTDDNALAYYNIITKGGRF  
4080 4090 4100 4110 4120 4130 4140 4150 4160 4170 4180

Wild ORF1ab MVVIPDYNITYKNITCDGITFTYASALWEIQQVVDADSKIVQLSEISMDNSPNLAWPLIVTALRANSVAVKLQNNELSPVALRQMSCAAGITQTACTDDNALAYYNIITKGGRF  
Vac ORF1ab MVVIPDYNITYKNITCDGITFTYASALWEIQQVVDADSKIVQLSEISMDNSPNLAWPLIVTALRANSVAVKLQNNELSPVALRQMSCAAGITQTACTDDNALAYYNIITKGGRF

VLALLSDLQDLKWARFPKSDGIGTIYTELEPPCRFVIDTPKGPKVKYLYF'IKGLNNLNRGMVLGSLAATVRLQAGNATEVPANSTVLSFCAFAVDAAKAYKDYLASGGQP  
4190 4200 4210 4220 4230 4240 4250 4260 4270 4280 4290

Wild ORF1ab VLALLSDLQDLKWARFPKSDGIGTIYTELEPPCRFVIDTPKGPKVKYLYF'IKGLNNLNRGMVLGSLAATVRLQAGNATEVPANSTVLSFCAFAVDAAKAYKDYLASGGQP  
Vac ORF1ab VLALLSDLQDLKWARFPKSDGIGTIYTELEPPCRFVIDTPKGPKVKYLYF'IKGLNNLNRGMVLGSLAATVRLQAGNATEVPANSTVLSFCAFAVDAAKAYKDYLASGGQP

ITNCVKMLCTHTIGTGOAITVTPKANMDOESFSGGASCCLYCRCHIDHPNPKGFCDLKGKYVQIPTTCANDPVGF'TLKNIVCTVCGMWKGYGCSCDQLREPMLQSADAQSFL  
4300 4310 4320 4330 4340 4350 4360 4370 4380 4390 4400

Wild ORF1ab ITNCVKMLCTHTIGTGOAITVTPKANMDOESFSGGASCCLYCRCHIDHPNPKGFCDLKGKYVQIPTTCANDPVGF'TLKNIVCTVCGMWKGYGCSCDQLREPMLQSADAQSFL  
Vac ORF1ab ITNCVKMLCTHTIGTGOAITVTPKANMDOESFSGGASCCLYCRCHIDHPNPKGFCDLKGKYVQIPTTCANDPVGF'TLKNIVCTVCGMWKGYGCSCDQLREPMLQSADAQSFL

NRVCGVSAARLTPCGTGTSTDVVYRAFDTIYNDKVAGFAKFLK'TNCCRFQEKDEDDNLIDSYFVVKRHITFSNYQHEETIYNLLKDCPAVAKHDFFKFRIDGDMVPHLSRQR  
4410 4420 4430 4440 4450 4460 4470 4480 4490 4500 4510

Wild ORF1ab NRVCGVSAARLTPCGTGTSTDVVYRAFDTIYNDKVAGFAKFLK'TNCCRFQEKDEDDNLIDSYFVVKRHITFSNYQHEETIYNLLKDCPAVAKHDFFKFRIDGDMVPHLSRQR  
Vac ORF1ab NRVCGVSAARLTPCGTGTSTDVVYRAFDTIYNDKVAGFAKFLK'TNCCRFQEKDEDDNLIDSYFVVKRHITFSNYQHEETIYNLLKDCPAVAKHDFFKFRIDGDMVPHLSRQR

LTKYIMADLVYALRHFDEGNCDTLKEILLVTYNCCDDDYFNKKDWYDFVENPDILRVYANLGERVROALLKTVQFCDAMRNAGIVGVLTLDNQDLNNGNRYDFGDFIQITTPG  
4520 4530 4540 4550 4560 4570 4580 4590 4600 4610 4620

Wild ORF1ab LTKYIMADLVYALRHFDEGNCDTLKEILLVTYNCCDDDYFNKKDWYDFVENPDILRVYANLGERVROALLKTVQFCDAMRNAGIVGVLTLDNQDLNNGNRYDFGDFIQITTPG  
Vac ORF1ab LTKYIMADLVYALRHFDEGNCDTLKEILLVTYNCCDDDYFNKKDWYDFVENPDILRVYANLGERVROALLKTVQFCDAMRNAGIVGVLTLDNQDLNNGNRYDFGDFIQITTPG



SGVPVDSYYSLLMPILLTLTRALTAESHVDTDLTKPYIKWDLKLYDFTEERLKLFDRIYFKYWDQTYHPNCVNCLDDRCILHCANFNVLFSVFPPTSFGLVVRKIFVDGV  
4630 4640 4650 4660 4670 4680 4690 4700 4710 4720 4730

Wild ORF1ab SGVPVDSYYSLLMPILLTLTRALTAESHVDTDLTKPYIKWDLKLYDFTEERLKLFDRIYFKYWDQTYHPNCVNCLDDRCILHCANFNVLFSVFPPTSFGLVVRKIFVDGV  
Vac ORF1ab SGVPVDSYYSLLMPILLTLTRALTAESHVDTDLTKPYIKWDLKLYDFTEERLKLFDRIYFKYWDQTYHPNCVNCLDDRCILHCANFNVLFSVFPPTSFGLVVRKIFVDGV

PFVWSTGYHFRELGVVHNQDVNLHSSRLSFKELLVYAADPAMHAASGNLLLDKRTTCF'SVAALINNVAFOIVKPGSEFNKDFYDFAVSKGFFKEGSSVELKHFFFAODGNA  
4740 4750 4760 4770 4780 4790 4800 4810 4820 4830 4840

Wild ORF1ab PFVWSTGYHFRELGVVHNQDVNLHSSRLSFKELLVYAADPAMHAASGNLLLDKRTTCF'SVAALINNVAFOIVKPGSEFNKDFYDFAVSKGFFKEGSSVELKHFFFAODGNA  
Vac ORF1ab PFVWSTGYHFRELGVVHNQDVNLHSSRLSFKELLVYAADPAMHAASGNLLLDKRTTCF'SVAALINNVAFOIVKPGSEFNKDFYDFAVSKGFFKEGSSVELKHFFFAODGNA

AISDYDYRYNLPIMCDIRQLLFVVEVVDKYFDCYDGGCINANQVIVNNLDKSAGFPFNKVGKARLYYDSMSYEDODALFAYTKRNVIPITITQMNLYAISAKNRARTVA  
4850 4860 4870 4880 4890 4900 4910 4920 4930 4940 4950

Wild ORF1ab AISDYDYRYNLPIMCDIRQLLFVVEVVDKYFDCYDGGCINANQVIVNNLDKSAGFPFNKVGKARLYYDSMSYEDODALFAYTKRNVIPITITQMNLYAISAKNRARTVA  
Vac ORF1ab AISDYDYRYNLPIMCDIRQLLFVVEVVDKYFDCYDGGCINANQVIVNNLDKSAGFPFNKVGKARLYYDSMSYEDODALFAYTKRNVIPITITQMNLYAISAKNRARTVA

GVSICSTMNROFHQKLLKSLAATRGAIVVIGTSKIFYGGWHNMLKTVYSDVENPHLMGWDYPKCDRAMPNMLRIMASLVLARKHTTCCSLSHRFYRLANECAQVLSSEMVM  
4960 4970 4980 4990 5000 5010 5020 5030 5040 5050 5060

Wild ORF1ab GVSICSTMNROFHQKLLKSLAATRGAIVVIGTSKIFYGGWHNMLKTVYSDVENPHLMGWDYPKCDRAMPNMLRIMASLVLARKHTTCCSLSHRFYRLANECAQVLSSEMVM  
Vac ORF1ab GVSICSTMNROFHQKLLKSLAATRGAIVVIGTSKIFYGGWHNMLKTVYSDVENPHLMGWDYPKCDRAMPNMLRIMASLVLARKHTTCCSLSHRFYRLANECAQVLSSEMVM

CGGSLYVKPGGTSSGDATTAYANSVFNICQAVTANVNALLSTDGINKIADKYVRNLQHRLYECLYRNRDVTDFVNEFYAYLRKHF'SMMILSDDAAVCFNSTYASQGLVAS  
5070 5080 5090 5100 5110 5120 5130 5140 5150 5160 5170

Wild ORF1ab CGGSLYVKPGGTSSGDATTAYANSVFNICQAVTANVNALLSTDGINKIADKYVRNLQHRLYECLYRNRDVTDFVNEFYAYLRKHF'SMMILSDDAAVCFNSTYASQGLVAS  
Vac ORF1ab CGGSLYVKPGGTSSGDATTAYANSVFNICQAVTANVNALLSTDGINKIADKYVRNLQHRLYECLYRNRDVTDFVNEFYAYLRKHF'SMMILSDDAAVCFNSTYASQGLVAS

IKNFKSVLYYQNNVFMSEAKCWTFETDLTKGPHEFCSQHTMLVKQGDDYVYLPYPDPSPRILGAGCFVDDIVKTDGTLMIERFVSLAIDAYPLTKHPNQEYADVHLYLQYI  
5180 5190 5200 5210 5220 5230 5240 5250 5260 5270 5280

Wild ORF1ab IKNFKSVLYYQNNVFMSEAKCWTFETDLTKGPHEFCSQHTMLVKQGDDYVYLPYPDPSPRILGAGCFVDDIVKTDGTLMIERFVSLAIDAYPLTKHPNQEYADVHLYLQYI  
Vac ORF1ab IKNFKSVLYYQNNVFMSEAKCWTFETDLTKGPHEFCSQHTMLVKQGDDYVYLPYPDPSPRILGAGCFVDDIVKTDGTLMIERFVSLAIDAYPLTKHPNQEYADVHLYLQYI

RKLHDELIGHMLDMYSVMLINDNISRWEPEFYEAMYTPHIVLQAVGACVLCNSQTSIRCGACIRRPFLLCCKCCYDHVISTSHKLVLSVNPYVCNAPGCDVTDVTQLYLG  
5290 5300 5310 5320 5330 5340 5350 5360 5370 5380 5390

Wild ORF1ab RKLHDELIGHMLDMYSVMLINDNISRWEPEFYEAMYTPHIVLQAVGACVLCNSQTSIRCGACIRRPFLLCCKCCYDHVISTSHKLVLSVNPYVCNAPGCDVTDVTQLYLG  
Vac ORF1ab RKLHDELIGHMLDMYSVMLINDNISRWEPEFYEAMYTPHIVLQAVGACVLCNSQTSIRCGACIRRPFLLCCKCCYDHVISTSHKLVLSVNPYVCNAPGCDVTDVTQLYLG

GMSYYCKSHKPPISFPLCANGQVFLYKNTCVGSDNVTDFNAIATCDWINAGDYILANICTERLKLFAAETLKATEETFKLSYGIATVREVLSDRELHLSWEV GKPRPPL  
5400 5410 5420 5430 5440 5450 5460 5470 5480 5490 5500

Wild ORF1ab GMSYYCKSHKPPISFPLCANGQVFLYKNTCVGSDNVTDFNAIATCDWINAGDYILANICTERLKLFAAETLKATEETFKLSYGIATVREVLSDRELHLSWEV GKPRPPL  
Vac ORF1ab GMSYYCKSHKPPISFPLCANGQVFLYKNTCVGSDNVTDFNAIATCDWINAGDYILANICTERLKLFAAETLKATEETFKLSYGIATVREVLSDRELHLSWEV GKPRPPL

NRNYVFTGYRVTKNSKVQIGEYTFEKGDYGDVAVYRGITTYKLVNGDYFVLTSHIVMPLSAPTLVPOEHYVRIITGLYPTLNLSDEFSSNVANYQKVGMOQKYSTLOGPPGI  
5510 5520 5530 5540 5550 5560 5570 5580 5590 5600 5610

Wild ORF1ab NRNYVFTGYRVTKNSKVQIGEYTFEKGDYGDVAVYRGITTYKLVNGDYFVLTSHIVMPLSAPTLVPOEHYVRIITGLYPTLNLSDEFSSNVANYQKVGMOQKYSTLOGPPGI  
Vac ORF1ab NRNYVFTGYRVTKNSKVQIGEYTFEKGDYGDVAVYRGITTYKLVNGDYFVLTSHIVMPLSAPTLVPOEHYVRIITGLYPTLNLSDEFSSNVANYQKVGMOQKYSTFOGPPGI

GKSHFAIGLALYYPSARIVYTACSHAAVDALCEKALKYLPIDKCSRIIPARARVECFDKFKVNSTLEQYVFCVNALPETTADIVVFDEISMATNYDLSVNVNARLRAKHY  
5620 5630 5640 5650 5660 5670 5680 5690 5700 5710 5720

Wild ORF1ab GKSHFAIGLALYYPSARIVYTACSHAAVDALCEKALKYLPIDKCSRIIPARARVECFDKFKVNSTLEQYVFCVNALPETTADIVVFDEISMATNYDLSVNVNARLRAKHY  
Vac ORF1ab GKSHFAIGLALYYPSARIVYTACSHAAVDALCEKALKYLPIDKCSRIIPARARVECFDKFKVNSTLEQYVFCVNALPETTADIVVFDEISMATNYDLSVNVNARLRAKHY

VYIGDPAQLPAPRTLLTKGTLEPEYFNVSVCRLMKITIGPDMFLGTCRRCPAEIVDITVSALVYDNKLAHKDKSAQCFKMFYKGVITHDVSSAINRPQIGVVREFLTRNPAW  
5730 5740 5750 5760 5770 5780 5790 5800 5810 5820 5830

Wild ORF1ab VYIGDPAQLPAPRTLLTKGTLEPEYFNVSVCRLMKITIGPDMFLGTCRRCPAEIVDITVSALVYDNKLAHKDKSAQCFKMFYKGVITHDVSSAINRPQIGVVREFLTRNPAW  
Vac ORF1ab VYIGDPAQLPAPRTLLTKGTLEPEYFNVSVCRLMKITIGPDMFLGTCRRCPAEIVDITVSALVYDNKLAHKDKSAQCFKMFYKGVITHDVSSAINRPQIGVVREFLTRNPAW

RKAVFISPYNSONAVASKVLGLPTQIVDSSQGSEYDYVIFITQITETAHSCNVNRFNVAITRAKVGILCIMS DRDLYDKLOFTSLEIPRRNVATLQAENVITGLFKDCSKVI  
5840 5850 5860 5870 5880 5890 5900 5910 5920 5930 5940

Wild ORF1ab RKAVFISPYNSONAVASKVLGLPTQIVDSSQGSEYDYVIFITQITETAHSCNVNRFNVAITRAKVGILCIMS DRDLYDKLOFTSLEIPRRNVATLQAENVITGLFKDCSKVI  
Vac ORF1ab RKAVFISPYNSONAVASKVLGLPTQIVDSSQGSEYDYVIFITQITETAHSCNVNRFNVAITRAKVGILCIMS DRDLYDKLOFTSLEIPRRNVATLQAENVITGLFKDCSKVI

TGLHPTQAPTHLSVDTKFKTEGLCVDIPGIPKDMTYRRLISMGMFKMNYQVNGYPNMFITREEAIRHVRAWIGFDVEGCHATREAVGINLPLQLGFSTGVNLVAVPTGYV  
5950 5960 5970 5980 5990 6000 6010 6020 6030 6040 6050

Wild ORF1ab TGLHPTQAPTHLSVDTKFKTEGLCVDIPGIPKDMTYRRLISMGMFKMNYQVNGYPNMFITREEAIRHVRAWIGFDVEGCHATREAVGINLPLQLGFSTGVNLVAVPTGYV  
Vac ORF1ab TGLHPTQAPTHLSVDTKFKTEGLCVDIPGIPKDMTYRRLISMGMFKMNYQVNGYPNMFITREEAIRHVRAWIGFDVEGCHATREAVGINLPLQLGFSTGVNLVAVPTGYV

DTPNNIDFSRVSAPPPGDFKHLIPLMYKGLPWNVVRKIVQMLSDTLKNLSDRVVFVLAHGFELTSMKYFVKIGPERTCCLDRRATCFSTASDTYACWHHSIGFDY  
6060 6070 6080 6090 6100 6110 6120 6130 6140 6150 6160

Wild ORF1ab DTPNNIDFSRVSAPPPGDFKHLIPLMYKGLPWNVVRKIVQMLSDTLKNLSDRVVFVLAHGFELTSMKYFVKIGPERTCCLDRRATCFSTASDTYACWHHSIGFDY  
Vac ORF1ab DTPNNIDFSRVSAPPPGDFKHLIPLMYKGLPWNVVRKIVQMLSDTLKNLSDRVVFVLAHGFELTSMKYFVKIGPERTCCLDRRATCFSTASDTYACWHHSIGFDY

VYNPFMIDVQOWGFTGNLQSNHDLVYCVHGNNAHVASCDAIMTRCLAVHECFVKRVDWTFIEYPIIGDELKINAACRKVQHMVKAALLADKFPVLHDIGNPKAIKCVPOAD  
6170 6180 6190 6200 6210 6220 6230 6240 6250 6260 6270

Wild ORF1ab VYNPFMIDVQOWGFTGNLQSNHDLVYCVHGNNAHVASCDAIMTRCLAVHECFVKRVDWTFIEYPIIGDELKINAACRKVQHMVKAALLADKFPVLHDIGNPKAIKCVPOAD  
Vac ORF1ab VYNPFMIDVQOWGFTGNLQSNHDLVYCVHGNNAHVASCDAIMTRCLAVHECFVKRVDWTFIEYPIIGDELKINAACRKVQHMVKAALLADKFPVLHDIGNPKAIKCVPOAD

VEWKFYDAQPCSDKAYKIEELFYASYATHSDKFIDGVCLFWNCNVDRYPANSIVCRFDTRVLSNINLPGCDGGSLYVKNKHAFTTPAFDKSAFVNLKQLPFFYYSDSPCESH  
6280 6290 6300 6310 6320 6330 6340 6350 6360 6370 6380

Wild ORF1ab VEWKFYDAQPCSDKAYKIEELFYASYATHSDKFIDGVCLFWNCNVDRYPANSIVCRFDTRVLSNINLPGCDGGSLYVKNKHAFTTPAFDKSAFVNLKQLPFFYYSDSPCESH  
Vac ORF1ab VEWKFYDAQPCSDKAYKIEELFYASYATHSDKFIDGVCLFWNCNVDRYPANSIVCRFDTRVLSNINLPGCDGGSLYVKNKHAFTTPAFDKSAFVNLKQLPFFYYSDSPCESH

GKQVSDIDYVPLKSATCITRCNLGGAVCRHHANEYRLYLDAYNMMISAGFSLWVYKQFDTYNLWNTFTRLQSLNVAFNVVKGHFDGQOGEVVPVSIINNIVYTKVDGV  
6390 6400 6410 6420 6430 6440 6450 6460 6470 6480 6490

Wild ORF1ab GKQVSDIDYVPLKSATCITRCNLGGAVCRHHANEYRLYLDAYNMMISAGFSLWVYKQFDTYNLWNTFTRLQSLNVAFNVVKGHFDGQOGEVVPVSIINNIVYTKVDGV  
Vac ORF1ab GKQVSDIDYVPLKSATCITRCNLGGAVCRHHANEYRLYLDAYNMMISAGFSLWVYKQFDTYNLWNTFTRLQSLNVAFNVVKGHFDGQOGEVVPVSIINNIVYTKVDGV

DVELFENKTTLFVNVAFELWAKRNIKPVPEVKILNNLGVDIAANIVWIDYKRDAPAHISTIGVCSMIDIACKPTEFTICAPLTVFFDGRVDGQVDLFRNARNGVLIITEGSV  
6500 6510 6520 6530 6540 6550 6560 6570 6580 6590 6600

Wild ORF1ab DVELFENKTTLFVNVAFELWAKRNIKPVPEVKILNNLGVDIAANIVWIDYKRDAPAHISTIGVCSMIDIACKPTEFTICAPLTVFFDGRVDGQVDLFRNARNGVLIITEGSV  
Vac ORF1ab DVELFENKTTLFVNVAFELWAKRNIKPVPEVKILNNLGVDIAANIVWIDYKRDAPAHISTIGVCSMIDIACKPTEFTICAPLTVFFDGRVDGQVDLFRNARNGVLIITEGSV

KGLQPSVGPQASLNGVTLIGEAVKTOFNYYKKVDGVVQQLPETYFTQSRNLQEFKPRSOMEIDFLELAMDEFIERYKLEGYAFEHIVYGDFSHSOLGGLHLIIGLAKRF  
6610 6620 6630 6640 6650 6660 6670 6680 6690 6700 6710

Wild ORF1ab KGLQPSVGPQASLNGVTLIGEAVKTOFNYYKKVDGVVQQLPETYFTQSRNLQEFKPRSOMEIDFLELAMDEFIERYKLEGYAFEHIVYGDFSHSOLGGLHLIIGLAKRF  
Vac ORF1ab KGLQPSVGPQASLNGVTLIGEAVKTOFNYYKKVDGVVQQLPETYFTQSRNLQEFKPRSOMEIDFLELAMDEFIERYKLEGYAFEHIVYGDFSHSOLGGLHLIIGLAKRF

KESPFELEDFFIPMDSTVKNYFITDAQTGSSKCVCSVIDLLIIDDVFEI IKSQDLSVSVKVKVTIDYTEISFMLWCKDGHVETTFYPKLQSSQAWQPGVAMPNLYKMORMLI  
6720 6730 6740 6750 6760 6770 6780 6790 6800 6810 6820

Wild ORF1ab KESPFELEDFFIPMDSTVKNYFITDAQTGSSKCVCSVIDLLIIDDVFEI IKSQDLSVSVKVKVTIDYTEISFMLWCKDGHVETTFYPKLQSSQAWQPGVAMPNLYKMORMLI  
Vac ORF1ab KESPFELEDFFIPMDSTVKNYFITDAQTGSSKCVCSVIDLLIIDDVFEI IKSQDLSVSVKVKVTIDYTEISFMLWCKDGHVETTFYPKLQSSQAWQPGVAMPNLYKMORMLI

EKCDLQNYGDSATLPGIMNVAKYTQLCQYLNLTLLAVPYNMRVIHFGAGSDKGAVPGTAVLRQWLPTGTLVDSDLNDFVSDADSTLIGDCATVHTANKWDLIISDMY  
6830 6840 6850 6860 6870 6880 6890 6900 6910 6920 6930

Wild ORF1ab EKCDLQNYGDSATLPGIMNVAKYTQLCQYLNLTLLAVPYNMRVIHFGAGSDKGAVPGTAVLRQWLPTGTLVDSDLNDFVSDADSTLIGDCATVHTANKWDLIISDMY  
Vac ORF1ab EKCDLQNYGDSATLPGIMNVAKYTQLCQYLNLTLLAVPYNMRVIHFGAGSDKGAVPGTAVLRQWLPTGTLVDSDLNDFVSDADSTLIGDCATVHTANKWDLIISDMY

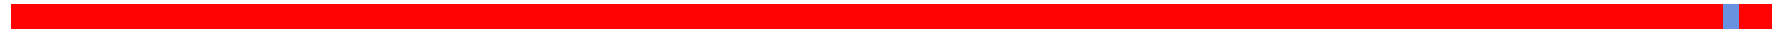

DPKTKNVTKENDSKEGFFTYICGFIOQKLALGGSVAIKITEHSWNADLYKLMGHFAWWTAFVINVNASSEAFLLIGCNYLGKPREQIDGYVMHANYIFWRNINPIQLSSY

6940 6950 6960 6970 6980 6990 7000 7010 7020 7030 7040

Wild ORF1ab DPKTKNVTKENDSKEGFFTYICGFIOQKLALGGSVAIKITEHSWNADLYKLMGHFAWWTAFVINVNASSEAFLLIGCNYLGKPREQIDGYVMHANYIFWRNINPIQLSSY

Vac ORF1ab DPKTKNVTKENDSKEGFFTYICGFIOQKLALGGSVAIKITEHSWNADLYKLMGHFAWWTAFVINVNASSEAFLLIGCNYLGKPREQIDGYVMHANYIFWRNINPIQLSSY

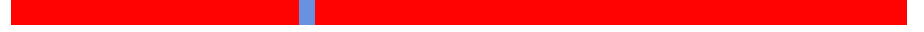

SLFDMSKFPLKLRGTAVMSLKEGQINDMILSLLSKGRLIIRENNRVVISSDVLVNN-

7050 7060 7070 7080 7090

Wild ORF1ab SLFDMSKFPLKLRGTAVMSLKEGQINDMILSLLSKGRLIIRENNRVVISSDVLVNN.

Vac ORF1ab SLFDMSKFPLKLRGTAVMSLKEGQINDMILSLLSKGRLIIRENNRVVISSDVLVNN.

MFVFLVLLPLVSSQCVNLTTRTQLPPAYTNSFTRGVYYPDKVFRSSVLHSTQDLFLPFFSNVTWFHAIHVSGINGIKRFDNPFVLPVPSNDGVYFASIGKSNIRGWIFGTTL  
10 20 30 40 50 60 70 80 90 100 110

Wild S MFVFLVLLPLVSSQCVNLTTRTQLPPAYTNSFTRGVYCPDKVFRSSVLHSTQDLFLPFFSNVTWFHAIHVSGINGIKRFDNPFVLPVPSNDGVYFASIGKSNIRGWIFGTTL  
Vac S MFVFLVLLPLVSSQCVNLTTRTQLPPAYTNSFTRGVYYPDKVFRSSVLHSTQDLFLPFFSNVTWFHAIHVSGINGIKRFDNPFVLPVPSNDGVYFASIEKSNIRGWIFGTTL

DSKTQSLLIVNNATNVVTKVCEFOFCNDPFLGVYYHKNNKGMWMESEFRVYSSANNCTFEYVSOPFLMDLEGGKQKFKNLREFVFKNIDGYFKIYSKHPTINLVRDLPOGF  
120 130 140 150 160 170 180 190 200 210 220

Wild S DSKTQSLLIVNNATNVVTKVCEFOFCNDPFLGVYYHKNNKGMWMESEFRVYSSANNCTFEYVSOPFLMDLEGGKQKFKNLREFVFKNIDGYFKIYSKHPTINLVRDLPOGF  
Vac S DSKTQSLLIVNNATNVVTKVCEFOFCNDPFLGVYYHKNNKSWMESEFRVYSSANNCTFEYVSOPFLMDLEGGKQKFKNLREFVFKNIDGYFKIYSKHPTINLVRDLPOGF

SALEPLVDLPIGINITRFQTLALHRSYLTPGDSSSGWTAGAAAYVGYLQPRTFLLKYNENGTITDAVDCALDPLSETKCTLKSFIVEKGIYQTSNFRVQPTESIVRFP  
230 240 250 260 270 280 290 300 310 320 330

Wild S SALEPLVDLPIGINITRFQTLALHRSYLTPGDSSSGWTAGAAAYVGYLQPRTFLLKYNENGTITDAVDCALDPLSETKCTLKSFIVEKGIYQTSNFRVQPTESIVRFP  
Vac S SALEPLVDLPIGINITRFQTLALHRSYLTPGDSSSGWTAGAAAYVGYLQPRTFLLKYNENGTITDAVDCALDPLSETKCTLKSFIVEKGIYQTSNFRVQPTESIVRFP

NIITNLCPFGEVFNATRFASVYAWNKRKISNCVADYSVLVNSASFSTFKCYGVSPITKLNLDLCFINVYADSFVIRGDEFVROIPAGQTGKLADYNYKLPDDFTGCVIAWNSNN  
340 350 360 370 380 390 400 410 420 430 440

Wild S NIITNLCPFGEVFNATRFASVYAWNKRKISNCVADYSVLVNSASFSTFKCYGVSPITKLNLDLCFINVYADSFVIRGDEFVROIPAGQTGKLADYNYKLPDDFTGCVIAWNSNN  
Vac S NIITNLCPFGEVFNATRFASVYAWNKRKISNCVADYSVLVNSASFSTFKCYGVSPITKLNLDLCFINVYADSFVIRGDEFVROIPAGQTGKLADYNYKLPDDFTGCVIAWNSNN

LDSKVGNNYNYLRYLFRKSNLKPFFERDISTEYQAGSTPCNGVEGFNCYFPLQSYGFQPTINGVGYQPYRVVLSFELLHAPATVCGPKKSTNLVKNKCVNFENGLITGIG  
450 460 470 480 490 500 510 520 530 540 550

Wild S LDSKVGNNYNYLRYLFRKSNLKPFFERDISTEYQAGSTPCNGVEGFNCYFPLQSYGFQPTINGVGYQPYRVVLSFELLHAPATVCGPKKSTNLVKNKCVNFENGLITGIG  
Vac S LDSKVGNNYNYLRYLFRKSNLKPFFERDISTEYQAGSTPCNGVEGFNCYFPLQSYGFQPTINGVGYQPYRVVLSFELLHAPATVCGPKKSTNLVKNKCVNFENGLITGIG

VLTESNKKFLPFQOQFRDIADITDAVRDPQTLLEILDITPCSFGGVSVITPGINISNOVAVLYQDVNCTEVPVAIHADQLTPTWRVYSTGNSNVFQTRAGCLIGAETHVNSY  
560 570 580 590 600 610 620 630 640 650 660

Wild S VLTESNKKFLPFQOQFRDIADITDAVRDPQTLLEILDITPCSFGGVSVITPGINISNOVAVLYQDVNCTEVPVAIHADQLTPTWRVYSTGNSNVFQTRAGCLIGAETHVNSY  
Vac S VLTESNKKFLPFQOQFRDIADITDAVRDPQTLLEILDITPCSFGGVSVITPGINISNOVAVLYQDVNCTEVPVAIHADQLTPTWRVYSTGNSNVFQTRAGCLIGAETHVNSY

ECDIPIGAGICASYOTQINSRRARSVASQSI IAYTMSLGAENSVAYSNNISIAIPINFTISVITTEILPVSMIKTSVDCIMYICGDSTECSNLLLOYGSFCTQLNRLITGI  
670 680 690 700 710 720 730 740 750 760 770

Wild S ECDIPIGAGICASYOTQINSRRARSVASQSI IAYTMSLGAENSVAYSNNISIAIPINFTISVITTEILPVSMIKTSVDCIMYICGDSTECSNLLLOYGSFCTQLNRLITGI  
Vac S ECDIPIGAGICASYOTQINSRRARSVASQSI IAYTMSLGAENSVAYSNNISIAIPINFTISVITTEILPVSMIKTSVDCIMYICGDSTECSNLLLOYGSFCTQLNRLITGI

AVEQDKNTQEVFAQVKQIYKTPPIKDFGGFNFSQILPDPSKPSKRSFIEDLLFNKVTILADAGFIKQYGDCLGDLAARDLICAQKFNGLITVLPPLLLTDEMTAQYTSALLAG  
780 790 800 810 820 830 840 850 860 870 880

Wild S AVEQDKNTQEVFAQVKQIYKTPPIKDFGGFNFSQILPDPSKPSKRSFIEDLLFNKVTILADAGFIKQYGDCLGDLAARDLICAQKFNGLITVLPPLLLTDEMTAQYTSALLAG  
Vac S AVEQDKNTQEVFAQVKQIYKTPPIKDFGGFNFSQILPDPSKPSKRSFIEDLLFNKVTILADAGFIKQYGDCLGDLAARDLICAQKFNGLITVLPPLLLTDEMTAQYTSALLAG

TITSGWTFGAGAALQIPFAMQMAYRFNGIGVTONVLYENOKLIANQFNNSAIGKIQDSLSSSTASALGKLQDVVNQNAQALNITLVKQLSANFGALSSVINDILSRDKVEAE  
890 900 910 920 930 940 950 960 970 980 990

Wild S TITSGWTFGAGAALQIPFAMQMAYRFNGIGVTONVLYENOKLIANQFNNSAIGKIQDSLSSSTASALGKLQDVVNQNAQALNITLVKQLSSNFGALSSVINDILSRDKVEAE  
Vac S TITSGWTFGAGAALQIPFAMQMAYRFNGIGVTONVLYENOKLIANQFNNSAIGKIQDSLSSSTASALGKLQDVVNQNAQALNITLVKQLSANFGALSSVINDILSRDKVEAE

VOIDRLITGRLOSLOTYVVTQQLIRAAEIRASANLAATKMSECVLGQSKRVDFCGKGYHLMSPPOSAPHGCVVFLHVTYVPAQEKNFITAPAI CHDGAHFPREGVFVSNGT  
1000 1010 1020 1030 1040 1050 1060 1070 1080 1090 1100

Wild S VQIDRLITGRLOSLOTYVVTQQLIRAAEIRASANLAATKMSECVLGQSKRVDFCGKGYHLMSPPOSAPHGCVVFLHVTYVPAQEKNFITAPAI CHDGAHFPREGVFVSNGT  
Vac S VQIDRLITGRLOSLOTYVVTQQLIRAAEIRASANLAATKMSECVLGQSKRVDFCGKGYHLMSPPOSAPHGCVVFLHVTYVPAQEKNFITAPAI CHDGAHFPREGVFVSNGT

HWFVTQRNFYEPQIITTDNITFVSGNCDVVIGIVNNIVYDPLQPELDSFKEELDKYFKNHTSPDVDLGDISGINASVVNIQKEIDRLNEVAKNLNESLIDLQELGKYEQYI  
1110 1120 1130 1140 1150 1160 1170 1180 1190 1200 1210

Wild S HWFVTQRNFYEPQIITTDNITFVSGNCDVVIGIVNNIVYDPLQPELDSFKEELDKYFKNHTSPDVDLGDISGINASVVNIQKEIDRLNEVAKNLNESLIDLQELGKYEQYI  
Vac S HWFVTQRNFYEPQIITTDNITFVSGNCDVVIGIVNNIVYDPLQPELDSFKEELDKYFKNHTSPDVDLGDISGINASVVNIQKEIDRLNEVAKNLNESLIDLQELGKYEQYI

KWPWYIWLGFIAGLIAIVMVTIMLCCMTSCCSCCLKGCCSCGSCCKFDEDDSEPVKGVKLYHT-  
1220 1230 1240 1250 1260 1270

Wild S KWPWYIWLGFIAGLIAIVMVTIMLCCMTSCCSCCLKGCCSCGSCCKFDEDDSEPVKGVKLYHT.  
Vac S KWPWYIWLGFIAGLIAIVMVTIMLCCMTSCCSCCLKGCCSCGSCCKFDEDDSEPVKGVKLYHT.

MDLFMRIFTTIGIVTLKQGEIKDATPSDFVRATATIPIQASLPFGWLVGVALLAVFQSASKIITLKKRWQLALSKGVHFVCNLLLLFVIVYSHLLLVAAGLEAPFLYLYA  
10 20 30 40 50 60 70 80 90 100 110

Wild ORF3a MDLFMRIFTTIGIVTLKQGEIKDATPSDFVRATATIPIQASLPFGWLVGVALLAVFQSASKIITLKKRWQLALSKGVHFVCNLLLLFVIVYSHLLLVAAGLEAPFLYLYA  
Vac ORF3a MDLFMRIFTTIGIVTLKQGEIKDATPSDFVRATATIPIQASLPFGWLVGVALLAVFQSASKIITLKKRWQLALSKGVHFVCNLLLLFVIVYSHLLLVAAGLEAPFLYLYA

LVYFLOSINFVRIIMRLWLCWKCRSKNPLLYDANYFLCWHINCYDYCIPYNSVTSSIVITTSGDGTTSPISEHDYQIGGYTEKWESGVKDCVVLHSYFTSDYYQLYSTQLS  
120 130 140 150 160 170 180 190 200 210 220

Wild ORF3a LVYFLOSINFVRIIMRLWLCWKCRSKNPLLYDANYFLCWHINCYDYCIPYNSVTSSIVITTSGDGTTSPISEHDYQIGGYTEKWESGVKDCVVLHSYFTSDYYQLYSTQLS  
Vac ORF3a LVYFLOSINFVRIIMRLWLCWKCRSKNPLLYDANYFLCWHINCYDYCIPYNSVTSSIVITTSGDGTTSPISEHDYQIGGYTEKWESGVKDCVVLHSYFTSDYYQLYSTQLS

TDIGVEHVITFFIYNKIVDEPEEHVQIHTIDGSSGVVNPVMEPIYDEPTTTTSVPL-  
230 240 250 260 270

Wild ORF3a TDIGVEHVITFFIYNKIVDEPEEHVQIHTIDGSSGVVNPVMEPIYDEPTTTTSVPL.  
Vac ORF3a TDIGVEHVITFFIYNKIVDEPEEHVQIHTIDGSSGVVNPVMEPIYDEPTTTTSVPL.

  
MYSFVSEETGTLIVNSVLLFLAFVVFLLVTLAALLTALRLCAYCCNIVNVSLVKPSFYVYSRVKNLNSSRVPELLV-  
10 20 30 40 50 60 70

Wild E MYSFVSEETGTLIVNSVLLFLAFVVFLLVTLAALLTALRLCAYCCNIVNVSLVKPSFYVYSRVKNLNSSRVPELLV.  
Vac E MYSFVSEETGTLIVNSVLLFLAFVVFLLVTLAALLTALRLCAYCCNIVNVSLVKPSFYVYSRVKNLNSSRVPELLV.



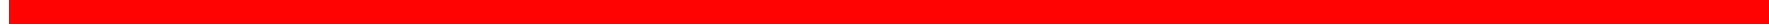

MADSNGTTTVEELKKLLEQWNLVIGFLFLTWICLLQFAYANRNRFLYIIKLIFLWLLWPVLACFVLAAVYRINWITGGIAIAMACLVGLMWLSYFIASFRLFARTRSMW

10 20 30 40 50 60 70 80 90 100 110

Wild M MADSN GTT TVEEL KKLL EQW NLV IG F L F L TW IC LL Q F A Y A N R N R F L Y I I K L I F L W L L W P V L A C F V L A A V Y R I N W I T G G I A I A M A C L V G L M W L S Y F I A S F R L F A R T R S M W  
 Vac M MADSN GTT TVEEL KKLL EQW NLV IG F L F L TW IC LL Q F A Y A N R N R F L Y I I K L I F L W L L W P V L A C F V L A A V Y R I N W I T G G I A I A M A C L V G L M W L S Y F I A S F R L F A R T R S M W

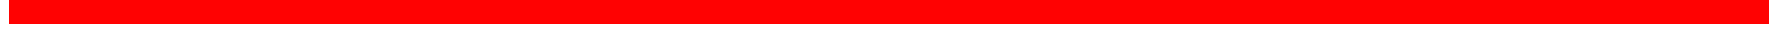

SFNPETNILLNVPLHGTILTRPLLESELVIGAVILRGHLRIAGHLGRCDIKDLPKEITVATSRTLSYKLGASORVAGDSGFAAYSRYRIGNYKLNIDHSSSDNIALL

120 130 140 150 160 170 180 190 200 210 220

Wild M SFNPE TNILLNVPLHGTILTRPLLESELVIGAVILRGHLRIAGHHLGRCDIKDLPKEITVATSRTL SYYKLGASORVAGDSGFAAYSRYRIGNYKLNIDHSSSSDNIALL  
 Vac M SFNPE TNILLNVPLHGTILTRPLLESELVIGAVILRGHLRIAGHHLGRCDIKDLPKEITVATSRTL SYYKLGASORVAGDSGFAAYSRYRIGNYKLNIDHSSSSDNIALL

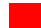

VQ-

Wild M VQ.  
 Vac M VQ.



MFHLVDFQVTIAEILLIIMRTFKVSIWNLDYIINLI IKNLSKSLTENKYSQLDEEQPMEID-

10 20 30 40 50 60

Wild ORF6 MFHLVDFQVTIAEILLIIMRTFKVSIWNLDYIINLI IKNLSKSLTENKYSQLDEEQPMEID.

Vac ORF6 MFHLVDFQVTIAEILLIIMRTFKVSIWNLDYIINLI IKNLSKSLTENKYSQLDEEQPMEID.

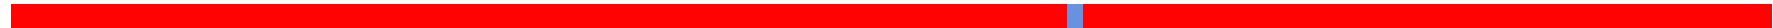

MKIIILFLALITLATCELYHYQECVRGTTVLLKEPCSSGTIEGNSPFHPLADNKFALTCFSTQFAFAYPDGVKHVYQLRARSVSPKLFIRQEEVQELYSPIFLIVAIVFI  
10 20 30 40 50 60 70 80 90 100 110

Wild ORF7a MKIIILFLALITLATCELYHYQECVRGTTVLLKEPCSSGTIEGNSPFHPLADNKFALTCFSTQFAFAYPDGVKHVYQLRARSVSPKLFIRQEEVQELYSPIFLIVAIVFI  
Vac ORF7a MKIIILFLALITLATCELYHYQECVRGTTVLLKEPCSSGTIEGNSPFHPLADNKFALTCFSTQFAFACPDGVKHVYQLRARSVSPKLFIRQEEVQELYSPIFLIVAIVFI

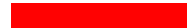

TLCFTLKRKTE-  
120

Wild ORF7a TLCFTLKRKTE.  
Vac ORF7a TLCFTLKRKTE.

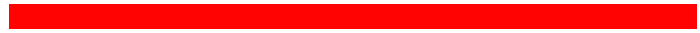

MIELSLIDFYLCFLAFLLEFLVLIIMLIIFWFSLEIQDHNETCHA-

10            20            30            40

Wild ORF7b MIELSLIDFYLCFLAFLLEFLVLIIMLIIFWFSLEIQDHNETCHA.

Vac ORF7b MIELSLIDFYLCFLAFLLEFLVLIIMLIIFWFSLEIQDHNETCHA.

  
MKFLVFLGLIITIVAAFHQECSLQSC<sup>T</sup>QHQP<sup>Y</sup>VVDDPCPIHF<sup>Y</sup>SKWYIRVGARKSAPLI<sup>E</sup>ELCVDEAGSKSPIQYIDIGNYTVSCSPFT<sup>T</sup>INCQEPKLGSLVWRCSFYEDFLE  
10 20 30 40 50 60 70 80 90 100 110

wild ORF8 MKFLVFLGLIITIVAAFHQECSLQSC<sup>T</sup>QHQP<sup>Y</sup>VVDDPCPIHF<sup>Y</sup>SKWYIRVGARKSAPLI<sup>E</sup>ELCVDEAGSKSPIQYIDIGNYTVSCSPFT<sup>T</sup>INCQEPKLGSLVWRCSFYEDFLE  
Vac ORF8 MKFLVFLGLIITIVAAFHQECSLQSC<sup>T</sup>QHQP<sup>Y</sup>VVDDPCPIHF<sup>Y</sup>SKWYIRVGARKSAPLI<sup>E</sup>ELCVDEAGSKSPIQYIDIGNYTVSCSPFT<sup>T</sup>INCQEPKLGSLVWRCSFYEDFLE

  
YHDVRVLD<sup>F</sup>I-  
120

wild ORF8 YHDVRVLD<sup>F</sup>I.  
Vac ORF8 YHDVRVLD<sup>F</sup>I.

MSDNGPQNQRNAPRITFGGSPDSTGSNONGERSGARSKORRPOGLPNNTASWF'TALTOHGKEDLKF'PRGQGVPIININSSPDDQIGYYRRATRRIIRGGDGKMKDLSRWYF  
10 20 30 40 50 60 70 80 90 100 110

Wild N MSDNGPQNQRNAPRITFGGSPDSTGSNONGERSGARSKORRPOGLPNNTASWF'TALTOHGKEDLKF'PRGQGVPIININSSPDDQIGYYRRATRRIIRGGDGKMKDLSRWYF  
Vac N MSDNGPQNQRNAPRITFGGSPDSTGSNONGERSGARSKORRPOGLPNNTASWF'TALTOHGKEDLKF'PRGQGVPIININSSPDDQIGYYRRATRRIIRGGDGKMKDLSRWYF

YYLGTGPEAGLPYGANKDGI IWWATEGALNTPKDHIGTRNPANNAATVLOLPOG'ITLTPKGF'YAEFSRGGSOASSRSSSRSRNSSRNSTPGSSRGTSPARMAGNGGDAALA  
120 130 140 150 160 170 180 190 200 210 220

Wild N YYLGTGPEAGLPYGANKDGI IWWATEGALNTPKDHIGTRNPANNAATVLOLPOG'ITLTPKGF'YAEFSRGGSOASSRSSSRSRNSSRNSTPGSSRGTSPARMAGNGGDAALA  
Vac N YYLGTGPEAGLPYGANKDGI IWWATEGALNTPKDHIGTRNPANNAATVLOLPOG'ITLTPKGF'YAEFSRGGSOASSRSSSRSRNSSRNSTPGSSRGTSPARMAGNGGDAALA

LLLLDRLNQLESKMSGKGQQQQGQIVTKKSAAEASKKPRQKR'TATKAYNVTQAFGRRGPEQTQGNFGDQELIRQGTIDYKHWPOIAQFAPSASAFFGMSRIGMEVTPSGTW  
230 240 250 260 270 280 290 300 310 320 330

Wild N LLLLLDRLNQLESKMSGKGQQQQGQIVTKKSAAEASKKPRQKR'TATKAYNVTQAFGRRGPEQTQGNFGDQELIRQGTIDYKHWPOIAQFAPSASAFFGMSRIGMEVTPSGTW  
Vac N LLLLLDRLNQLESKMSGKGQQQQGQIVTKKSAAEASKKPRQKR'TATKAYNVTQAFGRRGPEQTQGNFGDQELIRQGTIDYKHWPOIAQFAPSASAFFGMSRIGMEVTPSGTW

LTYTGAIKLLDDKDPNFKDQVILLNKHIDAYIT'FPPT'EPKKDKKKKADFTQALPQRQKKQQTIVTLLPAADLDDFSKQLQQSMSSADSTQA-  
340 350 360 370 380 390 400 410 420

Wild N LTYTGAIKLLDDKDPNFKDQVILLNKHIDAYIT'FPPT'EPKKDKKKKADFTQALPQRQKKQQTIVTLLPAADLDDFSKQLQQSMSSADSTQA.  
Vac N LTYTGAIKLLDDKDPNFKDQVILLNKHIDAYIT'FPPT'EPKKDKKKKADFTQALPQRQKKQQTIVTLLPAADLDDFSKQLQQSMSSADSTQA.

  
MGYINVFAPFPTIYSLLLCRMNSRNYIAQVDVVNFNLT-  
10 20 30

Wild ORF10 MGYINVFAPFPTIYSLLLCRMNSRNYIAQVDVVNFNLT.  
Vac ORF10 MGYINVFAPFPTIYSLLLCRMNSRNYIAQVDVVNFNLT.

**Fig. S11. Amino acid alignment of cold-adapted live attenuated SARS-CoV-2 vaccine strain.** Full amino acid sequences of cold-adapted live attenuated SARS-CoV-2 vaccine strain (CoV-2-CNUHV03-CA22°C) were aligned with that of wild-type SARS-CoV-2 (CoV-2-CNUHV03) using DNASTAR Lasergene.
